# Supplementary material for: Automated analysis of long-term grooming behavior in Drosophila using a k-nearest neighbors classifier
Source: eLife. 2018 Feb 27;7:e34497. doi: 10.7554/eLife.34497 (PMC5860874; doi:10.7554/eLife.34497)
Supplement: Figure 2—source data 1. [file elife-34497-fig2-data1.xlsx]

## Sheet: F2A
Figure 2A
Noise fluctuation	Probability
0	0.89094
1	0.06511
2	0.02711
3	0.01016
4	0.0041
5	0.00163
6	0.000624919
7	0.000228597
8	5.72103e-05
9	2.19726e-05
10	7.24284e-06
11	3.17383e-06
12	5.69662e-07
13	7.32421e-07
14	2.4414e-07
15	8.13802e-08
16	0
17	8.13802e-08
18	0
19	8.13802e-08

## Sheet: F2B
Figure 2B
Threshold C0	Max noise area
1	3073
2	467
3	147
4	169
5	73
6	49
7	32
8	23
9	21
10	21
11	18
12	15
13	12
14	11
15	6
16	5
17	4
18	3
19	2
20	2

## Sheet: F2C
Figure 2C
Grayscale	Porbability
24	0.000173581
26	0.000694323
28	0.00495
30	0.00816
32	0.01249
34	0.02109
36	0.03854
38	0.03714
40	0.03841
42	0.03523
44	0.02951
46	0.02695
48	0.02751
50	0.02118
52	0.01684
54	0.01914
56	0.01718
58	0.01875
60	0.0151
62	0.01484
64	0.01528
66	0.01354
68	0.01428
70	0.01579
72	0.01606
74	0.01618
76	0.01857
78	0.01953
80	0.01918
82	0.01857
84	0.01988
86	0.02274
88	0.01831
90	0.02231
92	0.02378
94	0.02179
96	0.02265
98	0.02196
100	0.01762
102	0.02092
104	0.02152
106	0.01762
108	0.01874
110	0.01836
112	0.01796
114	0.0151
116	0.01588
118	0.01245
120	0.01268
122	0.01224
124	0.00981
126	0.00989
128	0.0079
130	0.00937
132	0.00669
134	0.00451
136	0.00442
138	0.003
140	0.00122
142	0.00182
144	0.00191
146	0.000650928
148	0.000347162

## Sheet: F2D
Figure 2D
Fluctuation of position	Probability
0	0.85415
0.1	0.11649
0.2	0.01827
0.3	0.00954
0.4	0.00155
