# Supplementary material for: Automated analysis of long-term grooming behavior in Drosophila using a k-nearest neighbors classifier
Source: eLife. 2018 Feb 27;7:e34497. doi: 10.7554/eLife.34497 (PMC5860874; doi:10.7554/eLife.34497)
Supplement: Figure 2—source data 2. [file elife-34497-fig2-data2.xlsx]

## Sheet: F2-S1A
Fig 2-supplement 1A
Time	Fraction of time in locomotion	Relative humidity	Temperature
(hours)		(%)	(celcius)
0.08333	0.912666	77.65	26.3
0.16667	0.901	77.515	26.3
0.25	0.869112	77.705	26.3
0.33333	0.919666	77.675	26.3
0.41667	0.922222	77.645	26.3
0.5	0.894222	77.495	26.3
0.58333	0.789778	77.555	26.3
0.66667	0.860222	77.62	26.3
0.75	0.779888	77.635	26.3
0.83333	0.673	77.555	26.3
0.91667	0.663778	77.355	26.3
1	0.611112	77.33	26.3
1.08333	0.780222	77.37	26.3
1.16667	0.806444	77.34	26.3
1.25	0.829334	77.395	26.3
1.33333	0.775222	77.55	26.3
1.41667	0.698888	77.625	26.3
1.5	0.677222	77.555	26.3
1.58333	0.793556	77.62	26.3
1.66667	0.793334	77.76	26.3
1.75	0.628	77.795	26.3
1.83333	0.452556	77.33	26.3
1.91667	0.439444	77.48	26.3
2	0.520778	77.505	26.3
2.08333	0.536112	77.575	26.3
2.16667	0.646334	77.62	26.3
2.25	0.635222	77.685	26.3
2.33333	0.61	77.795	26.3
2.41667	0.456112	77.745	26.3
2.5	0.502	77.77	26.3
2.58333	0.370888	77.485	26.3
2.66667	0.487666	77.41	26.3
2.75	0.380222	77.375	26.3
2.83333	0.354112	77.525	26.3
2.91667	0.236112	77.565	26.3
3	0.412556	77.675	26.3
3.08333	0.549888	77.725	26.3
3.16667	0.501556	77.745	26.3
3.25	0.448444	77.75	26.3
3.33333	0.120444	77.625	26.3
3.41667	0.087334	77.65	26.3
3.5	0.330778	77.705	26.3
3.58333	0.372778	77.415	26.3
3.66667	0.248222	77.355	26.3
3.75	0.094222	77.395	26.3
3.83333	0.166	77.375	26.3
3.91667	0.282222	77.395	26.3
4	0.387556	77.405	26.3
4.08333	0.332112	77.555	26.3
4.16667	0.377112	77.495	26.3
4.25	0.320222	77.64	26.3
4.33333	0.331666	77.61	26.3
4.41667	0.287556	77.565	26.3
4.5	0.182	77.6	26.3
4.58333	0.172778	77.63	26.3
4.66667	0.237112	77.715	26.3
4.75	0.283	77.63	26.3
4.83333	0.224222	77.495	26.3
4.91667	0.533778	77.215	26.35
5	0.632	77.215	26.4
5.08333	0.596778	77.34	26.4
5.16667	0.504	77.395	26.4
5.25	0.499334	77.335	26.4
5.33333	0.418556	77.35	26.4
5.41667	0.391334	77.39	26.4
5.5	0.275222	77.425	26.3
5.58333	0.373666	77.555	26.3
5.66667	0.340666	77.6	26.4
5.75	0.337888	77.55	26.3
5.83333	0.345	77.52	26.3
5.91667	0.300444	77.5	26.3
6	0.394888	77.575	26.3
6.08333	0.396222	77.415	26.3
6.16667	0.355112	77.53	26.3
6.25	0.472778	77.535	26.3
6.33333	0.701334	77.52	26.3
6.41667	0.810778	77.575	26.3
6.5	0.761888	77.605	26.3
6.58333	0.551334	77.6	26.3
6.66667	0.536888	77.71	26.3
6.75	0.610222	77.63	26.3
6.83333	0.647112	77.555	26.3
6.91667	0.511	77.63	26.3
7	0.680222	77.54	26.3
7.08333	0.685	77.55	26.3
7.16667	0.793666	77.615	26.3
7.25	0.799334	77.615	26.3
7.33333	0.929556	77.515	26.3
7.41667	0.914	77.575	26.3
7.5	0.749444	77.57	26.3
7.58333	0.655888	77.525	26.3
7.66667	0.823112	77.495	26.3
7.75	0.837888	77.56	26.3
7.83333	0.792666	77.545	26.3
7.91667	0.938444	77.575	26.3
8	0.952	77.605	26.3
8.08333	0.951444	77.54	26.3
8.16667	0.801222	77.53	26.3
8.25	0.818444	77.485	26.3
8.33333	0.766888	77.555	26.3
8.41667	0.895444	77.455	26.3
8.5	0.924444	77.455	26.3
8.58333	0.876334	77.55	26.3
8.66667	0.931334	77.45	26.3
8.75	0.947778	77.445	26.3
8.83333	0.926666	77.575	26.3
8.91667	0.859666	77.595	26.3
9	0.900334	77.26	26.3
9.08333	0.943334	77.265	26.3
9.16667	0.905778	77.155	26.3
9.25	0.930888	77.265	26.3
9.33333	0.907	77.325	26.3
9.41667	0.900112	77.265	26.3
9.5	0.943	77.235	26.3
9.58333	0.890778	77.395	26.3
9.66667	0.946222	77.37	26.3
9.75	0.939444	77.4	26.3
9.83333	0.960444	77.365	26.3
9.91667	0.932888	77.05	26.3
10	0.898112	77.125	26.35
10.0833	0.933666	77.21	26.35
10.1667	0.941	77.18	26.4
10.25	0.958556	77.17	26.3
10.3333	0.864888	77.21	26.3
10.4167	0.944222	77.265	26.3
10.5	0.940444	77.23	26.3
10.5833	0.933112	77.325	26.3
10.6667	0.902112	77.265	26.3
10.75	0.951778	77.325	26.3
10.8333	0.925112	77.4	26.3
10.9167	0.949666	77.28	26.3
11	0.955888	77.41	26.3
11.0833	0.944888	77.175	26.3
11.1667	0.949222	77.195	26.3
11.25	0.967556	77.25	26.4
11.3333	0.932556	77.155	26.4
11.4167	0.944222	77.19	26.3
11.5	0.936888	77.175	26.3
11.5833	0.949334	77.2	26.3
11.6667	0.951778	77.14	26.3
11.75	0.948112	77.15	26.3
11.8333	0.949112	77.23	26.3
11.9167	0.959666	77.345	26.3
12	0.966222	77.31	26.3
12.0833	0.936222	77.3	26.3
12.1667	0.958222	77.28	26.3
12.25	0.942222	77.255	26.3
12.3333	0.924556	77.31	26.3
12.4167	0.944556	77.235	26.3
12.5	0.960112	77.005	26.3
12.5833	0.938	76.96	26.3
12.6667	0.955888	77.035	26.3
12.75	0.937	77.05	26.3
12.8333	0.959556	77.125	26.3
12.9167	0.942112	77.105	26.3
13	0.949778	77.21	26.3
13.0833	0.949666	77.205	26.3
13.1667	0.940778	77.26	26.3
13.25	0.940222	77.17	26.3
13.3333	0.937666	77.085	26.3
13.4167	0.921888	77.36	26.3
13.5	0.913334	77.29	26.3
13.5833	0.928112	77.275	26.3
13.6667	0.866334	77.325	26.3
13.75	0.823778	77.245	26.3
13.8333	0.776334	77.285	26.3
13.9167	0.778444	77.26	26.3
14	0.691334	77.265	26.3
14.0833	0.781222	77.34	26.3
14.1667	0.849222	77.28	26.3
14.25	0.938334	77.215	26.3
14.3333	0.849666	77.3	26.3
14.4167	0.740888	77.28	26.3
14.5	0.707	77.325	26.3
14.5833	0.613112	77.23	26.3
14.6667	0.705	77.375	26.3
14.75	0.809778	77.445	26.3
14.8333	0.656556	77.215	26.3
14.9167	0.710556	77.265	26.3
15	0.546556	77.24	26.3
15.0833	0.624666	77.31	26.3
15.1667	0.744888	77.33	26.3
15.25	0.501112	77.28	26.3
15.3333	0.608666	77.26	26.3
15.4167	0.474888	77.37	26.3
15.5	0.498556	77.435	26.3
15.5833	0.675778	77.475	26.3
15.6667	0.619	77.355	26.3
15.75	0.551	77.46	26.3
15.8333	0.631666	77.415	26.3
15.9167	0.536888	77.41	26.3
16	0.666778	77.46	26.3
16.0833	0.554778	77.49	26.3
16.1667	0.370444	77.435	26.3
16.25	0.511	77.465	26.3
16.3333	0.411666	77.475	26.3
16.4167	0.433	77.48	26.3
16.5	0.425334	77.44	26.3
16.5833	0.354666	77.28	26.3
16.6667	0.357778	77.35	26.3
16.75	0.495222	77.43	26.3
16.8333	0.333666	77.44	26.3
16.9167	0.197778	77.38	26.3
17	0.192666	77.38	26.3
17.0833	0.169222	77.475	26.3
17.1667	0.293112	77.445	26.3
17.25	0.399666	77.4	26.3
17.3333	0.420334	77.425	26.3
17.4167	0.255666	77.455	26.3
17.5	0.204556	77.445	26.3
17.5833	0.118556	77.36	26.3
17.6667	0.184222	77.43	26.3
17.75	0.307334	77.41	26.3
17.8333	0.213334	77.28	26.3
17.9167	0.098666	77.29	26.3
18	0.051444	77.38	26.3
18.0833	0.090778	77.37	26.3
18.1667	0.191222	77.355	26.3
18.25	0.086222	77.385	26.3
18.3333	0.049888	77.385	26.3
18.4167	0.032556	77.465	26.3
18.5	0.084	77.51	26.3
18.5833	0.18	77.34	26.3
18.6667	0.212334	77.39	26.3
18.75	0.125112	77.44	26.3
18.8333	0.078556	77.39	26.3
18.9167	0.274888	77.44	26.3
19	0.289556	77.385	26.3
19.0833	0.148666	77.27	26.3
19.1667	0.046666	77.305	26.3
19.25	0.018112	77.285	26.3
19.3333	0.026888	77.395	26.3
19.4167	0.014888	77.35	26.3
19.5	0.016556	77.38	26.3
19.5833	0.023	77.395	26.3
19.6667	0.029778	77.38	26.3
19.75	0.275444	77.505	26.3
19.8333	0.322334	77.37	26.3
19.9167	0.117556	77.405	26.3
20	0.291	77.37	26.3
20.0833	0.233556	77.43	26.3
20.1667	0.144888	77.42	26.3
20.25	0.029888	77.395	26.3
20.3333	0.013888	77.47	26.3
20.4167	0.034334	77.215	26.3
20.5	0.105778	77.24	26.3
20.5833	0.257888	77.2	26.3
20.6667	0.368556	77.23	26.3
20.75	0.266	77.215	26.3
20.8333	0.138112	77.155	26.3
20.9167	0.051666	77.27	26.3
21	0.060444	77.39	26.3
21.0833	0.068444	77.335	26.3
21.1667	0.272	77.235	26.3
21.25	0.349444	77.23	26.3
21.3333	0.327778	77.23	26.3
21.4167	0.240778	77.365	26.3
21.5	0.186556	77.37	26.3
21.5833	0.288	77.34	26.3
21.6667	0.393334	77.08	26.3
21.75	0.283556	77.09	26.35
21.8333	0.210112	77.115	26.3
21.9167	0.341666	77.175	26.3
22	0.326556	77.23	26.3
22.0833	0.484666	77.175	26.3
22.1667	0.390778	77.28	26.3
22.25	0.490112	77.22	26.3
22.3333	0.369112	77.275	26.3
22.4167	0.457112	77.225	26.3
22.5	0.626778	77.295	26.3
22.5833	0.557	77.255	26.3
22.6667	0.464334	77.255	26.3
22.75	0.481222	77.335	26.3
22.8333	0.529556	77.33	26.3
22.9167	0.482334	77.365	26.3
23	0.554334	77.38	26.3
23.0833	0.482334	77.375	26.3
23.1667	0.636778	77.465	26.3
23.25	0.705334	77.445	26.3
23.3333	0.748222	77.155	26.3
23.4167	0.586888	77.08	26.3
23.5	0.499	77.08	26.4
23.5833	0.708778	77.105	26.4
23.6667	0.728888	77.135	26.3
23.75	0.888888	77.165	26.3
23.8333	0.743334	77.175	26.3
23.9167	0.655666	77.18	26.3
24	0.833556	77.255	26.3
24.0833	0.934334	77.385	26.3
24.1667	0.882666	77.415	26.3
24.25	0.731222	77.38	26.3
24.3333	0.705	77.395	26.3
24.4167	0.634334	77.355	26.3
24.5	0.605112	77.4	26.3
24.5833	0.662888	77.465	26.25
24.6667	0.729444	77.495	26.3
24.75	0.487112	77.405	26.25
24.8333	0.500112	77.525	26.2
24.9167	0.638444	77.615	26.2
25	0.629444	77.25	26.3
25.0833	0.545444	77.195	26.3
25.1667	0.456666	77.33	26.3
25.25	0.512888	77.29	26.3
25.3333	0.452888	77.34	26.3
25.4167	0.562222	77.395	26.3
25.5	0.588	77.315	26.3
25.5833	0.570222	77.465	26.3
25.6667	0.466222	77.39	26.3
25.75	0.310112	77.485	26.3
25.8333	0.258	77.635	26.3
25.9167	0.297666	77.575	26.3
26	0.405222	77.6	26.3
26.0833	0.471222	77.61	26.3
26.1667	0.336888	77.625	26.25
26.25	0.384888	77.675	26.3
26.3333	0.252778	77.71	26.3
26.4167	0.207888	77.87	26.2
26.5	0.164666	77.735	26.2
26.5833	0.080888	77.865	26.2
26.6667	0.157444	77.845	26.2
26.75	0.287444	77.695	26.2
26.8333	0.103112	77.9	26.2
26.9167	0.045888	78.015	26.2
27	0.161778	78.015	26.15
27.0833	0.178888	77.72	26.15
27.1667	0.232444	77.695	26.2
27.25	0.282556	77.65	26.2
27.3333	0.322222	77.64	26.2
27.4167	0.236334	77.47	26.2
27.5	0.209556	77.555	26.15
27.5833	0.236888	77.42	26.1
27.6667	0.178	77.19	26.2
27.75	0.187112	77.15	26.2
27.8333	0.250444	77.075	26.2
27.9167	0.405778	77.13	26.1
28	0.341222	76.975	26.2
28.0833	0.260888	76.705	26.2
28.1667	0.222888	76.71	26.2
28.25	0.210778	76.715	26.2
28.3333	0.311666	76.625	26.2
28.4167	0.352222	76.655	26.15
28.5	0.326888	76.8	26.1
28.5833	0.214888	76.735	26.1
28.6667	0.188778	76.445	26.2
28.75	0.189334	76.375	26.15
28.8333	0.380444	76.425	26.1
28.9167	0.322556	76.46	26.1
29	0.304222	76.61	26.1
29.0833	0.261222	76.3	26.1
29.1667	0.282888	76.125	26.2
29.25	0.332444	76.22	26.15
29.3333	0.295112	76.265	26.1
29.4167	0.154666	76.21	26.1
29.5	0.161	76.255	26.1
29.5833	0.143778	76.335	26.1
29.6667	0.163	76.07	26.1
29.75	0.280666	76.01	26.15
29.8333	0.329888	76.095	26.2
29.9167	0.338112	76.045	26.1
30	0.498556	76.345	26.1
30.0833	0.568222	75.995	26.1
30.1667	0.556778	75.96	26.2
30.25	0.662334	75.98	26.2
30.3333	0.451556	75.88	26.15
30.4167	0.227778	76.02	26.1
30.5	0.350778	75.975	26.1
30.5833	0.352222	75.8	26.15
30.6667	0.628778	75.765	26.2
30.75	0.661888	75.71	26.2
30.8333	0.721	75.78	26.15
30.9167	0.780334	75.785	26.1
31	0.655556	76.095	26.1
31.0833	0.665778	75.75	26.1
31.1667	0.591222	75.74	26.1
31.25	0.608556	75.735	26.1
31.3333	0.804778	75.77	26.1
31.4167	0.787112	75.805	26.1
31.5	0.780778	75.885	26.1
31.5833	0.894334	75.885	26.1
31.6667	0.919778	75.635	26.1
31.75	0.762888	75.735	26.1
31.8333	0.692888	75.765	26.1
31.9167	0.693778	75.825	26.1
32	0.744444	75.75	26.1
32.0833	0.744222	75.57	26.1
32.1667	0.744556	75.7	26.1
32.25	0.789334	75.775	26.1
32.3333	0.947778	75.68	26.1
32.4167	0.960778	75.91	26.1
32.5	0.924	75.63	26.1
32.5833	0.745222	75.705	26.1
32.6667	0.822556	75.74	26.1
32.75	0.967334	75.8	26.1
32.8333	0.886	75.91	26.1
32.9167	0.750112	75.795	26.1
33	0.907556	75.56	26.1
33.0833	0.946556	75.615	26.1
33.1667	0.969888	75.84	26.1
33.25	0.946222	75.535	26.1
33.3333	0.907334	75.53	26.1
33.4167	0.911444	75.615	26.1
33.5	0.941112	75.755	26.1
33.5833	0.917556	75.89	26.1
33.6667	0.913112	75.77	26.1
33.75	0.855444	75.525	26.1
33.8333	0.940666	75.565	26.1
33.9167	0.899888	75.84	26.1
34	0.898222	75.68	26.1
34.0833	0.969556	75.4	26.1
34.1667	0.911666	75.45	26.1
34.25	0.931	75.525	26.1
34.3333	0.897222	75.58	26.1
34.4167	0.937	75.3	26.1
34.5	0.876778	75.35	26.1
34.5833	0.891112	75.415	26.1
34.6667	0.950888	75.67	26.1
34.75	0.950222	75.425	26.1
34.8333	0.925778	75.29	26.1
34.9167	0.935112	75.34	26.1
35	0.964334	75.52	26.1
35.0833	0.937222	75.325	26.1
35.1667	0.921444	75.23	26.1
35.25	0.924666	75.335	26.1
35.3333	0.920444	75.62	26.1
35.4167	0.938444	75.505	26.1
35.5	0.917112	75.475	26.1
35.5833	0.941222	75.53	26.1
35.6667	0.960888	75.57	26.1
35.75	0.934778	75.35	26.1
35.8333	0.942	75.295	26.1
35.9167	0.941334	75.465	26.1
36	0.932778	75.585	26.1
36.0833	0.939888	75.625	26.1
36.1667	0.925222	75.5	26.1
36.25	0.943888	75.475	26.1
36.3333	0.942222	75.6	26.1
36.4167	0.970666	75.85	26.1
36.5	0.883888	76.04	26.05
36.5833	0.962222	75.755	26.1
36.6667	0.950556	75.79	26.1
36.75	0.938556	75.87	26.1
36.8333	0.935	76.06	26.1
36.9167	0.965112	76.09	26.05
37	0.929888	75.905	26.1
37.0833	0.908112	75.835	26.1
37.1667	0.911444	75.99	26.1
37.25	0.946334	76.235	26.1
37.3333	0.843	76.155	26.1
37.4167	0.801222	76.305	26.1
37.5	0.897444	76.175	26.1
37.5833	0.827888	76.18	26.1
37.6667	0.796222	76.25	26.1
37.75	0.783778	76.43	26.1
37.8333	0.691222	76.48	26.1
37.9167	0.791	76.255	26.1
38	0.755112	76.22	26.1
38.0833	0.817112	76.42	26.1
38.1667	0.747888	76.425	26.1
38.25	0.755222	76.605	26.1
38.3333	0.856666	76.55	26.1
38.4167	0.806112	76.48	26.1
38.5	0.733556	76.615	26.1
38.5833	0.671888	76.595	26.1
38.6667	0.639666	76.84	26.1
38.75	0.641334	76.84	26.1
38.8333	0.579778	76.54	26.1
38.9167	0.321888	76.58	26.1
39	0.486	76.605	26.1
39.0833	0.506	76.705	26.1
39.1667	0.546112	76.915	26.1
39.25	0.494556	76.985	26.1
39.3333	0.624444	76.965	26.1
39.4167	0.574334	76.78	26.1
39.5	0.295778	76.825	26.1
39.5833	0.421888	76.915	26.1
39.6667	0.386556	77.045	26.1
39.75	0.423778	77.105	26.1
39.8333	0.423112	77.035	26.1
39.9167	0.232112	76.82	26.1
40	0.395666	76.845	26.1
40.0833	0.376	76.91	26.1
40.1667	0.298112	77.105	26.1
40.25	0.126444	77.245	26.1
40.3333	0.155556	77.165	26.1
40.4167	0.144334	77.03	26.1
40.5	0.106444	77.055	26.1
40.5833	0.219222	77.22	26.1
40.6667	0.318778	77.24	26.1
40.75	0.159888	77.3	26.1
40.8333	0.109112	77.145	26.1
40.9167	0.079222	77.12	26.2
41	0.023888	77.145	26.15
41.0833	0.129334	77.25	26.1
41.1667	0.241666	77.39	26.1
41.25	0.226112	77.38	26.1
41.3333	0.152888	77.55	26.1
41.4167	0.228	77.255	26.1
41.5	0.121334	77.24	26.1
41.5833	0.206	77.255	26.1
41.6667	0.344	77.275	26.1
41.75	0.305334	77.4	26.1
41.8333	0.152444	77.43	26.1
41.9167	0.041334	77.265	26.15
42	0.053888	77.185	26.2
42.0833	0.177556	77.27	26.1
42.1667	0.299888	77.375	26.1
42.25	0.342222	77.455	26.1
42.3333	0.271778	77.36	26.1
42.4167	0.178334	77.105	26.1
42.5	0.046	77.07	26.2
42.5833	0.189666	77.245	26.15
42.6667	0.327	77.255	26.1
42.75	0.252556	77.315	26.1
42.8333	0.224888	77.265	26.1
42.9167	0.031112	77.17	26.1
43	0.02	77.225	26.2
43.0833	0.091334	77.16	26.1
43.1667	0.072222	77.32	26.1
43.25	0.177222	77.365	26.1
43.3333	0.330444	77.53	26.1
43.4167	0.025556	77.385	26.15
43.5	0.02	77.215	26.2
43.5833	0.053556	77.36	26.2
43.6667	0.046556	77.445	26.2
43.75	0.241	77.45	26.15
43.8333	0.281666	77.615	26.1
43.9167	0.062666	77.615	26.1
44	0.022556	77.405	26.1
44.0833	0.013112	77.385	26.2
44.1667	0.158222	77.35	26.2
44.25	0.060666	77.36	26.2
44.3333	0.041112	77.4	26.1
44.4167	0.137112	77.42	26.1
44.5	0.109112	77.2	26.1
44.5833	0.197666	77.065	26.2
44.6667	0.320222	77.105	26.2
44.75	0.199	77.165	26.2
44.8333	0.187666	77.325	26.2
44.9167	0.183334	77.23	26.15
45	0.179666	76.945	26.15
45.0833	0.316666	77.035	26.25
45.1667	0.109666	77.12	26.3
45.25	0.103112	77.105	26.3
45.3333	0.231556	77.035	26.2
45.4167	0.180666	77.05	26.2
45.5	0.343556	77.195	26.2
45.5833	0.350444	77.35	26.2
45.6667	0.439888	77.34	26.15
45.75	0.473888	77.015	26.2
45.8333	0.362666	77.08	26.2
45.9167	0.369334	76.97	26.2
46	0.398112	77.175	26.2
46.0833	0.363222	77.19	26.15
46.1667	0.535666	77.265	26.1
46.25	0.492778	76.925	26.25
46.3333	0.396222	76.96	26.25
46.4167	0.370666	77	26.2
46.5	0.495666	77.04	26.2
46.5833	0.357222	77.115	26.2
46.6667	0.411556	77.305	26.1
46.75	0.503112	77.26	26.2
46.8333	0.528556	77.055	26.2
46.9167	0.444888	77.12	26.2
47	0.442888	77.095	26.2
47.0833	0.397556	77.205	26.2
47.1667	0.451334	77.335	26.1
47.25	0.447	77.46	26.1
47.3333	0.450778	77.46	26.1
47.4167	0.432556	77.295	26.2
47.5	0.547778	77.2	26.2
47.5833	0.715556	77.245	26.2
47.6667	0.671666	77.31	26.2
47.75	0.788222	77.49	26.1
47.8333	0.783	77.45	26.1
47.9167	0.731444	77.545	26.1
48	0.684	77.37	26.1
48.0833	0.528334	77.34	26.15
48.1667	0.672	77.31	26.15
48.25	0.66	77.29	26.15
48.3333	0.527444	77.295	26.15
48.4167	0.522222	77.35	26.1
48.5	0.698	77.52	26.1
48.5833	0.678222	77.645	26.1
48.6667	0.707222	77.595	26.1
48.75	0.644112	77.305	26.1
48.8333	0.522888	77.255	26.1
48.9167	0.506666	77.25	26.1
49	0.511334	77.425	26.1
49.0833	0.500778	77.185	26.1
49.1667	0.455222	76.99	26.1
49.25	0.321556	76.855	26.1
49.3333	0.377556	76.975	26.1
49.4167	0.312334	77.105	26.1
49.5	0.301222	76.795	26.1
49.5833	0.316778	76.725	26.1
49.6667	0.151112	76.795	26.1
49.75	0.165778	76.84	26.1
49.8333	0.188112	76.47	26.1
49.9167	0.284778	76.435	26.1
50	0.319778	76.605	26.1
50.0833	0.321888	76.64	26.1
50.1667	0.570666	76.34	26.1
50.25	0.536222	76.135	26.1
50.3333	0.470888	76.365	26.1
50.4167	0.426222	76.315	26.1
50.5	0.363334	76.555	26.1
50.5833	0.285222	76.375	26.1
50.6667	0.239888	76.35	26.1
50.75	0.192112	76.225	26.1
50.8333	0.212444	76.345	26.1
50.9167	0.386888	76.46	26.1
51	0.365666	76.035	26.1
51.0833	0.339	76.06	26.1
51.1667	0.330778	76.055	26.1
51.25	0.260222	76.135	26.1
51.3333	0.198444	76.42	26.1
51.4167	0.259556	76.025	26.1
51.5	0.3	76.07	26.1
51.5833	0.233334	75.96	26.1
51.6667	0.230334	75.975	26.1
51.75	0.204	76.085	26.1
51.8333	0.237666	75.965	26.1
51.9167	0.224778	75.75	26.1
52	0.174888	75.77	26.1
52.0833	0.185556	76.055	26.1
52.1667	0.182888	75.925	26.1
52.25	0.212666	75.685	26.1
52.3333	0.393	76.14	26.1
52.4167	0.306556	76.33	26.1
52.5	0.339556	76.595	26.1
52.5833	0.273556	76.725	26.1
52.6667	0.196444	76.51	26.1
52.75	0.134888	76.52	26.1
52.8333	0.171666	76.565	26.1
52.9167	0.048	76.585	26.05
53	0.132112	76.515	26
53.0833	0.257888	76.365	26
53.1667	0.356888	76.285	26.05
53.25	0.366222	76.31	26
53.3333	0.379666	76.345	26
53.4167	0.370112	76.11	25.95
53.5	0.392222	75.935	26
53.5833	0.475556	75.88	26.05
53.6667	0.519222	76.005	26
53.75	0.476888	76.05	25.95
53.8333	0.358556	75.985	25.9
53.9167	0.292888	75.895	26
54	0.456888	75.795	26
54.0833	0.549222	75.835	26
54.1667	0.349334	75.785	26
54.25	0.200556	75.795	25.9
54.3333	0.222	75.81	25.95
54.4167	0.444778	75.675	26
54.5	0.647556	75.735	26
54.5833	0.777222	75.775	25.95
54.6667	0.733222	75.74	25.9
54.75	0.714666	75.685	26
54.8333	0.637888	75.535	26
54.9167	0.687334	75.54	26
55	0.318444	75.52	25.95
55.0833	0.410666	75.54	25.9
55.1667	0.58	75.48	25.95
55.25	0.646778	75.425	26
55.3333	0.638222	75.475	26
55.4167	0.738888	75.51	25.95
55.5	0.689888	75.52	25.9
55.5833	0.63	75.455	26
55.6667	0.681	75.365	26
55.75	0.641556	75.31	25.95
55.8333	0.754556	75.43	26
55.9167	0.773222	75.31	26
56	0.818	75.245	26
56.0833	0.797112	75.285	26
56.1667	0.750222	75.335	25.95
56.25	0.720778	75.4	25.95
56.3333	0.751778	75.26	26
56.4167	0.863	75.22	26
56.5	0.963778	75.2	25.9
56.5833	0.940444	75.295	25.95
56.6667	0.908666	75.22	26
56.75	0.838666	75.185	26
56.8333	0.830666	75.21	25.95
56.9167	0.912112	75.375	25.9
57	0.952112	75.265	25.9
57.0833	0.938112	75.16	25.9
57.1667	0.796444	75.25	25.9
57.25	0.827334	75.25	25.9
57.3333	0.922334	75.355	25.9
57.4167	0.927	75.245	26
57.5	0.860666	75.205	26
57.5833	0.911222	75.195	25.9
57.6667	0.848222	75.26	25.9
57.75	0.824888	75.25	26
57.8333	0.939	75.2	26
57.9167	0.949	75.2	25.95
58	0.944556	75.335	25.9
58.0833	0.916222	75.395	25.9
58.1667	0.936778	75.46	25.95
58.25	0.917888	75.395	26
58.3333	0.915778	75.42	26
58.4167	0.916	75.58	25.95
58.5	0.938444	75.51	25.9
58.5833	0.82	75.7	25.9
58.6667	0.951666	75.69	25.95
58.75	0.913444	75.695	26
58.8333	0.924	75.655	26
58.9167	0.947444	75.76	26
59	0.903334	75.63	25.9
59.0833	0.923888	75.75	25.95
59.1667	0.949112	75.69	26
59.25	0.897334	75.73	26
59.3333	0.928666	75.815	26
59.4167	0.923666	75.89	25.95
59.5	0.906556	75.86	25.9
59.5833	0.917666	75.85	26
59.6667	0.964334	75.78	26.1
59.75	0.895222	75.825	26
59.8333	0.907112	75.945	26
59.9167	0.937	76.075	26
60	0.899444	76.285	25.95
60.0833	0.946556	76.425	25.95
60.1667	0.893666	76.215	26
60.25	0.960334	76.315	26
60.3333	0.933778	76.37	26
60.4167	0.876112	76.445	26
60.5	0.942778	76.44	25.95
60.5833	0.912222	76.525	25.95
60.6667	0.898222	76.35	26.05
60.75	0.938	76.495	26.05
60.8333	0.867556	76.545	26.05
60.9167	0.884334	76.605	26
61	0.790778	76.775	26
61.0833	0.813666	76.785	25.95
61.1667	0.782778	76.615	26.05
61.25	0.770666	76.72	26.1
61.3333	0.779556	76.795	26.1
61.4167	0.701	76.81	26.05
61.5	0.689444	76.85	26
61.5833	0.775112	76.95	26
61.6667	0.810334	77.03	26
61.75	0.686888	76.825	26.1
61.8333	0.722444	76.61	26.1
61.9167	0.661444	76.625	26.1
62	0.658778	76.785	26.1
62.0833	0.576112	76.81	26.1
62.1667	0.621666	76.98	26.1
62.25	0.670334	76.78	26.1
62.3333	0.630888	76.545	26.2
62.4167	0.495334	76.445	26.1
62.5	0.380444	76.65	26.1
62.5833	0.494	76.64	26.1
62.6667	0.562112	76.65	26.1
62.75	0.447556	76.68	26.1
62.8333	0.356556	76.895	26.1
62.9167	0.500666	76.84	26.15
63	0.456112	76.515	26.25
63.0833	0.467112	76.48	26.2
63.1667	0.357888	76.445	26.2
63.25	0.274222	76.48	26.2
63.3333	0.485112	76.58	26.2
63.4167	0.413334	76.65	26.2
63.5	0.295778	76.625	26.15
63.5833	0.297	76.855	26.15
63.6667	0.222222	76.615	26.2
63.75	0.326556	76.405	26.3
63.8333	0.333334	76.44	26.3
63.9167	0.357444	76.55	26.3
64	0.248444	76.51	26.3
64.0833	0.116778	76.58	26.2
64.1667	0.071888	76.73	26.2
64.25	0.040666	76.845	26.2
64.3333	0.441334	76.94	26.2
64.4167	0.173112	77.065	26.2
64.5	0.031888	76.83	26.3
64.5833	0.136666	76.625	26.3
64.6667	0.142334	76.695	26.3
64.75	0.121222	76.765	26.3
64.8333	0.151888	76.59	26.3
64.9167	0.240666	76.63	26.3
65	0.232112	76.635	26.3
65.0833	0.123	76.745	26.25
65.1667	0.138778	76.865	26.2
65.25	0.294778	76.905	26.2
65.3333	0.100334	76.99	26.2
65.4167	0.029334	77.01	26.25
65.5	0.150888	76.71	26.3
65.5833	0.199112	76.68	26.3
65.6667	0.159888	76.56	26.3
65.75	0.107666	76.705	26.3
65.8333	0.231778	76.67	26.3
65.9167	0.145444	76.805	26.3
66	0.159334	76.865	26.25
66.0833	0.088	76.97	26.25
66.1667	0.140556	77.065	26.2
66.25	0.082112	77.155	26.25
66.3333	0.139334	76.895	26.3
66.4167	0.039666	76.77	26.3
66.5	0.121444	76.7	26.3
66.5833	0.174778	76.725	26.3
66.6667	0.099444	76.65	26.3
66.75	0.066666	76.66	26.3
66.8333	0.014444	76.92	26.25
66.9167	0.023	77.05	26.2
67	0.118888	77.105	26.2
67.0833	0.194112	77	26.3
67.1667	0.159112	76.905	26.3
67.25	0.182222	76.845	26.3
67.3333	0.153334	76.69	26.3
67.4167	0.093112	76.69	26.3
67.5	0.038	76.79	26.3
67.5833	0.133888	76.79	26.3
67.6667	0.020556	76.89	26.3
67.75	0.085556	77.08	26.25
67.8333	0.198112	77.185	26.2
67.9167	0.150112	77.22	26.25
68	0.090334	76.91	26.3
68.0833	0.034888	77	26.3
68.1667	0.029888	77.045	26.3
68.25	0.007444	76.855	26.3
68.3333	0.196	76.775	26.3
68.4167	0.261222	76.975	26.3
68.5	0.078112	76.895	26.3
68.5833	0.031	76.84	26.3
68.6667	0.045444	77.035	26.25
68.75	0.077334	77.215	26.2
68.8333	0.097888	77.035	26.3
68.9167	0.336444	76.905	26.3
69	0.397556	76.79	26.3
69.0833	0.402666	76.585	26.3
69.1667	0.481222	76.72	26.3
69.25	0.219666	76.69	26.3
69.3333	0.108556	76.75	26.3
69.4167	0.055112	76.77	26.3
69.5	0.194888	77.04	26.3
69.5833	0.208334	77.21	26.3
69.6667	0.206	77.115	26.3
69.75	0.231888	76.85	26.3
69.8333	0.349778	76.6	26.3
69.9167	0.406	76.655	26.3
70	0.366	76.745	26.3
70.0833	0.410778	76.755	26.3
70.1667	0.566222	76.9	26.3
70.25	0.378666	76.805	26.3
70.3333	0.297112	76.79	26.3
70.4167	0.376222	77.16	26.3
70.5	0.371444	77.165	26.2
70.5833	0.355	77.4	26.2
70.6667	0.385778	77.23	26.3
70.75	0.289556	76.955	26.3
70.8333	0.350666	76.94	26.3
70.9167	0.325444	76.93	26.3
71	0.454222	76.9	26.3
71.0833	0.548666	76.95	26.3
71.1667	0.528112	77.135	26.3
71.25	0.446444	77.065	26.3
71.3333	0.311666	77.11	26.3
71.4167	0.440222	77.16	26.25
71.5	0.328112	77.145	26.25
71.5833	0.430778	76.92	26.3
71.6667	0.656334	77.35	26.2
71.75	0.542112	77.575	26.2
71.8333	0.379666	77.48	26.2
71.9167	0.304	77.125	26.3
72	0.376112	77.065	26.3

## Sheet: F2-S1D
Fig 2-supplement 1D
k-value	Cross validation loss
1	0.194
2	0.20808
3	0.17648
4	0.17464
5	0.16564
6	0.1628
7	0.15896
8	0.15704
9	0.15536
10	0.1528
11	0.1518
12	0.151
13	0.14948
14	0.14792
15	0.149
16	0.14748
17	0.14736
18	0.14612
19	0.14644
20	0.1474
21	0.14488
22	0.14524
23	0.14684
24	0.1454
25	0.14612
26	0.14572
27	0.14604
28	0.14536
29	0.14564
30	0.14596
31	0.147
32	0.14588
33	0.14592
34	0.14552
35	0.14636
36	0.14532
37	0.1464
38	0.14612
39	0.14592
40	0.1458
41	0.14728
42	0.14544
43	0.14544
44	0.14436
45	0.14516
46	0.145
47	0.14456
48	0.14472
49	0.14492
50	0.14516
