# Supplementary material for: Automated analysis of long-term grooming behavior in Drosophila using a k-nearest neighbors classifier
Source: eLife. 2018 Feb 27;7:e34497. doi: 10.7554/eLife.34497 (PMC5860874; doi:10.7554/eLife.34497)
Supplement: Figure 3—source data 1. [file elife-34497-fig3-data1.xlsx]

## Sheet: F3B
Figure 3B
filter_size	Accuracy	sensitivity
4_5	0.661	0.962
8_10	0.755	0.93
8_15	0.662	0.966
10_15	0.73	0.955
10_20	0.707	0.936
12_15	0.909	0.905
14_15	0.944	0.753
15_20	0.807	0.928
