# Supplementary material for: Automated analysis of long-term grooming behavior in Drosophila using a k-nearest neighbors classifier
Source: eLife. 2018 Feb 27;7:e34497. doi: 10.7554/eLife.34497 (PMC5860874; doi:10.7554/eLife.34497)
Supplement: Figure 4—source data 1. [file elife-34497-fig4-data1.xlsx]

## Sheet: F4A
Figure 4A
Time	grooming	locomotion	feed	short rest	sleep	wakeful
0	0	0	0	1	0	1
0.2	0	0	0	1	0	1
0.4	0	0	0	1	0	1
0.6	0	0	0	1	0	1
0.8	0	0	0	1	0	1
1	0	0	0	1	0	1
1.2	0	0	0	1	0	1
1.4	0	0	0	1	0	1
1.6	0	0	0	1	0	1
1.8	0	0	0	1	0	1
2	0	0	0	1	0	1
2.2	0	0	0	1	0	1
2.4	0	0	0	1	0	1
2.6	0	0	0	1	0	1
2.8	0	0	0	1	0	1
3	0	0	0	1	0	1
3.2	0	0	0	1	0	1
3.4	0	0	0	1	0	1
3.6	0	0	0	1	0	1
3.8	1	0	0	0	0	1
4	1	0	0	0	0	1
4.2	1	0	0	0	0	1
4.4	1	0	0	0	0	1
4.6	1	0	0	0	0	1
4.8	1	0	0	0	0	1
5	1	0	0	0	0	1
5.2	1	0	0	0	0	1
5.4	1	0	0	0	0	1
5.6	1	0	0	0	0	1
5.8	1	0	0	0	0	1
6	1	0	0	0	0	1
6.2	1	0	0	0	0	1
6.4	1	0	0	0	0	1
6.6	1	0	0	0	0	1
6.8	1	0	0	0	0	1
7	1	0	0	0	0	1
7.2	1	0	0	0	0	1
7.4	1	0	0	0	0	1
7.6	1	0	0	0	0	1
7.8	1	0	0	0	0	1
8	1	0	0	0	0	1
8.2	1	0	0	0	0	1
8.4	1	0	0	0	0	1
8.6	1	0	0	0	0	1
8.8	1	0	0	0	0	1
9	1	0	0	0	0	1
9.2	1	0	0	0	0	1
9.4	1	0	0	0	0	1
9.6	1	0	0	0	0	1
9.8	1	0	0	0	0	1
10	1	0	0	0	0	1
10.2	1	0	0	0	0	1
10.4	1	0	0	0	0	1
10.6	1	0	0	0	0	1
10.8	1	0	0	0	0	1
11	1	0	0	0	0	1
11.2	1	0	0	0	0	1
11.4	1	0	0	0	0	1
11.6	1	0	0	0	0	1
11.8	1	0	0	0	0	1
12	1	0	0	0	0	1
12.2	1	0	0	0	0	1
12.4	1	0	0	0	0	1
12.6	1	0	0	0	0	1
12.8	1	0	0	0	0	1
13	1	0	0	0	0	1
13.2	1	0	0	0	0	1
13.4	1	0	0	0	0	1
13.6	1	0	0	0	0	1
13.8	1	0	0	0	0	1
14	1	0	0	0	0	1
14.2	1	0	0	0	0	1
14.4	1	0	0	0	0	1
14.6	1	0	0	0	0	1
14.8	1	0	0	0	0	1
15	1	0	0	0	0	1
15.2	1	0	0	0	0	1
15.4	1	0	0	0	0	1
15.6	1	0	0	0	0	1
15.8	0	0	0	1	0	1
16	0	0	0	1	0	1
16.2	0	0	0	1	0	1
16.4	0	1	0	0	0	1
16.6	0	0	0	1	0	1
16.8	0	0	0	1	0	1
17	0	0	0	1	0	1
17.2	0	0	0	1	0	1
17.4	0	0	0	1	0	1
17.6	0	1	0	0	0	1
17.8	0	1	0	0	0	1
18	0	1	0	0	0	1
18.2	0	0	0	1	0	1
18.4	0	1	0	0	0	1
18.6	0	1	0	0	0	1
18.8	0	1	0	0	0	1
19	0	0	0	1	0	1
19.2	0	1	0	0	0	1
19.4	0	1	0	0	0	1
19.6	0	0	0	1	0	1
19.8	0	1	0	0	0	1
20	0	1	0	0	0	1
20.2	0	1	0	0	0	1
20.4	0	1	0	0	0	1
20.6	0	1	0	0	0	1
20.8	0	0	0	1	0	1
21	0	1	0	0	0	1
21.2	0	1	0	0	0	1
21.4	0	0	0	1	0	1
21.6	0	0	0	1	0	1
21.8	0	0	0	1	0	1
22	0	0	0	1	0	1
22.2	0	0	0	1	0	1
22.4	0	0	0	1	0	1
22.6	0	0	0	1	0	1
22.8	0	0	0	1	0	1
23	0	0	0	1	0	1
23.2	0	0	0	1	0	1
23.4	0	0	0	1	0	1
23.6	0	0	0	1	0	1
23.8	0	0	0	1	0	1
24	0	0	0	1	0	1
24.2	0	0	0	1	0	1
24.4	0	0	0	1	0	1
24.6	0	0	0	1	0	1
24.8	0	0	0	1	0	1
25	0	0	0	1	0	1
25.2	0	0	0	1	0	1
25.4	0	0	0	1	0	1
25.6	0	0	0	1	0	1
25.8	0	0	0	1	0	1
26	0	0	0	1	0	1
26.2	0	0	0	1	0	1
26.4	0	0	0	1	0	1
26.6	0	0	0	1	0	1
26.8	0	0	0	1	0	1
27	0	0	0	1	0	1
27.2	0	0	0	1	0	1
27.4	0	0	0	1	0	1
27.6	0	0	0	1	0	1
27.8	0	0	0	1	0	1
28	0	0	0	1	0	1
28.2	0	0	0	1	0	1
28.4	0	0	0	1	0	1
28.6	0	0	0	1	0	1
28.8	0	0	0	1	0	1
29	0	0	0	1	0	1
29.2	0	0	0	1	0	1
29.4	0	0	0	1	0	1
29.6	0	0	0	1	0	1
29.8	0	0	0	1	0	1
30	0	0	0	1	0	1
30.2	0	0	0	1	0	1
30.4	0	0	0	1	0	1
30.6	0	0	0	1	0	1
30.8	0	0	0	1	0	1
31	0	0	0	1	0	1
31.2	0	0	0	1	0	1
31.4	0	0	0	1	0	1
31.6	0	0	0	1	0	1
31.8	0	0	0	1	0	1
32	0	0	0	1	0	1
32.2	0	0	0	1	0	1
32.4	0	0	0	1	0	1
32.6	0	0	0	1	0	1
32.8	0	0	0	1	0	1
33	0	0	0	1	0	1
33.2	0	0	0	1	0	1
33.4	0	0	0	1	0	1
33.6	0	0	0	1	0	1
33.8	0	0	0	1	0	1
34	0	0	0	1	0	1
34.2	0	0	0	1	0	1
34.4	0	0	0	1	0	1
34.6	0	0	0	1	0	1
34.8	0	0	0	1	0	1
35	0	0	0	1	0	1
35.2	0	0	0	1	0	1
35.4	0	0	0	1	0	1
35.6	0	0	0	1	0	1
35.8	0	0	0	1	0	1
36	0	0	0	1	0	1
36.2	0	0	0	1	0	1
36.4	0	0	0	1	0	1
36.6	0	0	0	1	0	1
36.8	0	0	0	1	0	1
37	0	0	0	1	0	1
37.2	0	0	0	1	0	1
37.4	0	0	0	1	0	1
37.6	0	0	0	1	0	1
37.8	0	0	0	1	0	1
38	0	0	0	1	0	1
38.2	0	0	0	1	0	1
38.4	0	0	0	1	0	1
38.6	0	0	0	1	0	1
38.8	0	0	0	1	0	1
39	0	0	0	1	0	1
39.2	0	0	0	1	0	1
39.4	0	0	0	1	0	1
39.6	0	0	0	1	0	1
39.8	0	0	0	1	0	1
40	0	0	0	1	0	1
40.2	0	0	0	1	0	1
40.4	0	0	0	1	0	1
40.6	0	0	0	1	0	1
40.8	0	0	0	1	0	1
41	0	0	0	1	0	1
41.2	1	0	0	0	0	1
41.4	1	0	0	0	0	1
41.6	1	0	0	0	0	1
41.8	1	0	0	0	0	1
42	1	0	0	0	0	1
42.2	1	0	0	0	0	1
42.4	1	0	0	0	0	1
42.6	1	0	0	0	0	1
42.8	1	0	0	0	0	1
43	1	0	0	0	0	1
43.2	1	0	0	0	0	1
43.4	1	0	0	0	0	1
43.6	1	0	0	0	0	1
43.8	1	0	0	0	0	1
44	1	0	0	0	0	1
44.2	1	0	0	0	0	1
44.4	1	0	0	0	0	1
44.6	1	0	0	0	0	1
44.8	0	0	0	0	1	0
45	0	0	0	0	1	0
45.2	0	0	0	0	1	0
45.4	0	0	0	0	1	0
45.6	0	0	0	0	1	0
45.8	0	0	0	0	1	0
46	0	0	0	0	1	0
46.2	0	0	0	0	1	0
46.4	0	0	0	0	1	0
46.6	0	0	0	0	1	0
46.8	0	0	0	0	1	0
47	0	0	0	0	1	0
47.2	0	0	0	0	1	0
47.4	0	0	0	0	1	0
47.6	0	0	0	0	1	0
47.8	0	0	0	0	1	0
48	0	0	0	0	1	0
48.2	0	0	0	0	1	0
48.4	0	0	0	0	1	0
48.6	0	0	0	0	1	0
48.8	0	0	0	0	1	0
49	0	0	0	0	1	0
49.2	0	0	0	0	1	0
49.4	0	0	0	0	1	0
49.6	0	0	0	0	1	0
49.8	0	0	0	0	1	0
50	0	0	0	0	1	0
50.2	0	0	0	0	1	0
50.4	0	0	0	0	1	0
50.6	0	0	0	0	1	0
50.8	0	0	0	0	1	0
51	0	0	0	0	1	0
51.2	0	0	0	0	1	0
51.4	0	0	0	0	1	0
51.6	0	0	0	0	1	0
51.8	0	0	0	0	1	0
52	0	0	0	0	1	0
52.2	0	0	0	0	1	0
52.4	0	0	0	0	1	0
52.6	0	0	0	0	1	0
52.8	0	0	0	0	1	0
53	0	0	0	0	1	0
53.2	0	0	0	0	1	0
53.4	0	0	0	0	1	0
53.6	0	0	0	0	1	0
53.8	0	0	0	0	1	0
54	0	0	0	0	1	0
54.2	0	0	0	0	1	0
54.4	0	0	0	0	1	0
54.6	0	0	0	0	1	0
54.8	0	0	0	0	1	0
55	0	0	0	0	1	0
55.2	0	0	0	0	1	0
55.4	0	0	0	0	1	0
55.6	0	0	0	0	1	0
55.8	0	0	0	0	1	0
56	0	0	0	0	1	0
56.2	0	0	0	0	1	0
56.4	0	0	0	0	1	0
56.6	0	0	0	0	1	0
56.8	0	0	0	0	1	0
57	0	0	0	0	1	0
57.2	0	0	0	0	1	0
57.4	0	0	0	0	1	0
57.6	0	0	0	0	1	0
57.8	0	0	0	0	1	0
58	0	0	0	0	1	0
58.2	0	0	0	0	1	0
58.4	0	0	0	0	1	0
58.6	0	0	0	0	1	0
58.8	0	0	0	0	1	0
59	0	0	0	0	1	0
59.2	0	0	0	0	1	0
59.4	0	0	0	0	1	0
59.6	0	0	0	0	1	0
59.8	0	0	0	0	1	0

## Sheet: F4C,D
Figure 4C,D
Fraction of time spent in behaviors (wt)
grooming	locomotion	sleep	short rest	feeding
0.0699144	0.404012	0.319447	0.181292	0.0289537
0.0774005	0.262095	0.455213	0.173213	0.0351435
0.054375	0.339287	0.43938	0.142917	0.0267454
0.0912917	0.29985	0.426875	0.135583	0.0495301
0.0683241	0.46288	0.316704	0.128428	0.0299745
0.0732731	0.381231	0.310243	0.216491	0.0236412
0.0797269	0.192861	0.472868	0.160762	0.103655
0.0707245	0.454662	0.313535	0.132609	0.0313912
0.0703171	0.207146	0.52488	0.131116	0.0700602
0.0795116	0.425725	0.259032	0.200856	0.0385694
0.0771088	0.0752639	0.688435	0.148373	0.0126968
0.0665185	0.198264	0.603428	0.115167	0.0190046
0.074706	0.105525	0.607414	0.183856	0.0317824
0.056412	0.126993	0.587282	0.218586	0.0125255
0.0800718	0.218907	0.576065	0.121498	0.00538657
0.07101	0.339241	0.384826	0.185748	0.0209684
0.0595957	0.212438	0.528817	0.168253	0.0403449
0.0617978	0.129953	0.677003	0.124541	0.0123619
0.0519468	0.274641	0.499896	0.149012	0.0261389
0.0618472	0.364164	0.354141	0.204639	0.0214861
0.0745255	0.217093	0.491988	0.192171	0.027787
0.0710602	0.344653	0.384032	0.193935	0.00731944
0.0603079	0.312394	0.458243	0.157558	0.0161921
0.0640417	0.343569	0.440183	0.137025	0.0165602
0.0668796	0.258738	0.437935	0.217407	0.0211875
0.0810625	0.37638	0.300512	0.213081	0.0306435
0.0887824	0.3425	0.331479	0.207817	0.0319884
0.0502037	0.167236	0.685618	0.0839028	0.0165764
0.0452616	0.186715	0.567995	0.142461	0.0627963
0.0737153	0.288576	0.379509	0.193484	0.0711921
0.0446042	0.190977	0.621687	0.127174	0.0246551
0.0589028	0.185176	0.578889	0.122479	0.0621806
0.0576019	0.0920394	0.666796	0.161329	0.0283935
0.0987593	0.178287	0.514648	0.153859	0.0585995
0.0909514	0.458361	0.203125	0.175903	0.0742106
0.102634	0.107352	0.56537	0.171799	0.0557361
0.0614676	0.368528	0.352669	0.163715	0.0577917
0.0570347	0.184201	0.668766	0.087831	0.00877083
0.0604074	0.249653	0.558676	0.104609	0.0297407
0.066463	0.213711	0.443873	0.23115	0.0472245
0.054287	0.246289	0.535153	0.153139	0.0135231
0.0510023	0.158979	0.630706	0.114713	0.0544838
0.0606019	0.213965	0.577333	0.133088	0.0206435
0.0660787	0.213808	0.496213	0.167051	0.0626667
0.0523356	0.298164	0.495887	0.14463	0.00924769
0.0658519	0.318109	0.427949	0.17065	0.0204653
0.0591042	0.178748	0.627493	0.110532	0.0284097
0.0710926	0.243954	0.491539	0.182833	0.0189653
0.0697801	0.259581	0.463044	0.189597	0.0249792
0.0494838	0.0809005	0.788551	0.0724375	0.014338
0.0576366	0.191424	0.586299	0.139391	0.0275787
0.0470579	0.134889	0.689481	0.0974745	0.0431019
0.0583194	0.324433	0.360977	0.213097	0.045537
0.0549514	0.245278	0.478472	0.183389	0.0400671
0.0518981	0.209558	0.584324	0.120046	0.0407778
0.0574213	0.238873	0.540525	0.163491	0.00505787
0.0668495	0.165063	0.563648	0.193558	0.016088
0.066598	0.216072	0.533892	0.161626	0.030115
0.0646559	0.315448	0.407382	0.169086	0.0492569
0.0565934	0.210321	0.578187	0.137503	0.0266566
0.0651366	0.152709	0.591197	0.170933	0.0279506
0.0595378	0.189659	0.588089	0.148529	0.0170556
0.0624537	0.203237	0.56452	0.145757	0.0280123
0.048963	0.136775	0.656812	0.136279	0.0283102
0.0663711	0.227014	0.510531	0.189446	0.00944444
0.0527801	0.211263	0.525551	0.156404	0.0588866
0.0634707	0.222535	0.553554	0.136337	0.0304421
0.0615563	0.45435	0.273713	0.159941	0.0530679
0.0699923	0.362413	0.362116	0.176597	0.0340617
0.0520008	0.205199	0.587379	0.136408	0.0253387
0.0448009	0.180337	0.623473	0.132478	0.0243287
0.0752076	0.346375	0.358883	0.184941	0.0374861
0.0510262	0.183271	0.624638	0.128601	0.0197099
0.054865	0.249695	0.531626	0.127036	0.0410903
0.0536165	0.218489	0.553883	0.157246	0.021409
0.0759985	0.134144	0.657541	0.111584	0.0251728
0.0465833	0.140603	0.682934	0.113342	0.0271181
0.0626412	0.197615	0.580738	0.130194	0.0352168
0.0654506	0.198954	0.565351	0.156237	0.0212338
0.0519522	0.302206	0.447907	0.161631	0.0444398
0.0509769	0.262959	0.52777	0.139606	0.0268148
0.0541458	0.105074	0.680888	0.15506	0.0119907
0.0567261	0.307805	0.459826	0.153347	0.0283789

## Sheet: F4E
Figure 4E
	Fraction of time spent in behaviors (wt)
time(hours)	grooming	locomotion	feeding	short rest	sleep	wake
0	0.0695556	0.418667	0.181667	0.330111	0	1
0.5	0.107778	0.0347778	0	0.104556	0.752889	0.247111
1	0.00822222	0.00144444	0	0.00122222	0.989111	0.0108889
1.5	0.0524444	0.265333	0.0274444	0.0784444	0.576333	0.423667
2	0.135889	0.633778	0.0584444	0.171889	0	1
2.5	0.019	0.00811111	0	0.00188889	0.971	0.029
3	0	0	0	0	1	0
3.5	0.0513333	0.107444	0.137111	0.103667	0.600444	0.399556
4	0.101556	0.230222	0.046	0.202	0.420222	0.579778
4.5	0.00177778	0	0	0	0.998222	0.00177778
5	0.0687778	0	0	0.00633333	0.924889	0.0751111
5.5	0	0	0	0	1	0
6	0.0273333	0.00922222	0	0.143	0.820444	0.179556
6.5	0.0212222	0.00366667	0	0.0101111	0.965	0.035
7	0	0	0	0	1	0
7.5	0	0	0	0	1	0
8	0	0	0	0	1	0
8.5	0	0	0	0	1	0
9	0.0198889	0.000333333	0	0.00222222	0.977556	0.0224444
9.5	0	0.0215556	0.00388889	0.0145556	0.96	0.04
10	0.065	0.687222	0.0653333	0.182444	0	1
10.5	0.0634444	0.447556	0.04	0.0812222	0.367778	0.632222
11	0	0	0	0	1	0
11.5	0	0	0	0	1	0
12	0	0	0	0	1	0
12.5	0	0	0	0	1	0
13	0	0	0	0	1	0
13.5	0	0	0	0	1	0
14	0	0	0	0	1	0
14.5	0	0	0	0	1	0
15	0	0	0	0	1	0
15.5	0	0	0	0	1	0
16	0	0	0	0	1	0
16.5	0	0	0	0	1	0
17	0	0.000111111	0	0	0.999889	0.000111111
17.5	0	0	0	0	1	0
18	0	0	0	0	1	0
18.5	0	0	0	0	1	0
19	0.0303333	0.410333	0.0725556	0.132889	0.353889	0.646111
19.5	0.123444	0.121778	0.024	0.244222	0.486556	0.513444
20	0	0	0	0	1	0
20.5	0.0954444	0.00377778	0	0.253222	0.647556	0.352444
21	0.0164444	0	0	0	0.983556	0.0164444
21.5	0.109889	0.615667	0.112778	0.161667	0	1
22	0.0646667	0.569333	0.0761111	0.289889	0	1
22.5	0.104889	0.251778	0.150556	0.492778	0	1
23	0.0753333	0.519333	0.119778	0.285556	0	1
23.5	0.0903333	0.238444	0.101	0.128889	0.441333	0.558667
24	0.169556	0.333667	0.114222	0.267667	0.114889	0.885111
24.5	0.118889	0.565556	0.081	0.234556	0	1
25	0.157	0.434778	0.0521111	0.268444	0.0876667	0.912333
25.5	0	0	0	0	1	0
26	0.00166667	0	0	0	0.998333	0.00166667
26.5	0	0	0	0	1	0
27	0.00322222	0	0	0	0.996778	0.00322222
27.5	0.051	0.00133333	0	0.051	0.896667	0.103333
28	0.018	0	0	0.0945556	0.887444	0.112556
28.5	0	0	0	0	1	0
29	0	0	0	0	1	0
29.5	0	0	0	0	1	0
30	0	0	0	0	1	0
30.5	0	0	0	0	1	0
31	0	0	0	0	1	0
31.5	0	0	0	0	1	0
32	0.00311111	0.00188889	0	0.000111111	0.994889	0.00511111
32.5	0	0	0	0	1	0
33	0.0214444	0.00722222	0.019	0.0278889	0.924444	0.0755556
33.5	0.213556	0.223444	0.0673333	0.298444	0.197222	0.802778
34	0.0553333	0.743333	0.0412222	0.160111	0	1
34.5	0.0723333	0.668	0.0628889	0.196778	0	1
35	0.115556	0.408667	0.0536667	0.209111	0.213	0.787
35.5	0	0	0	0	1	0
36	0	0	0	0	1	0
36.5	0.04	0.000555556	0	0.0448889	0.914556	0.0854444
37	0.0268889	0.00122222	0	0.00266667	0.969222	0.0307778
37.5	0	0	0	0	1	0
38	0.0281111	0.01	0.0348889	0.0148889	0.912111	0.0878889
38.5	0.0867778	0.0774444	0.0865556	0.0825556	0.666667	0.333333
39	0	0	0	0	1	0
39.5	0.0302222	0	0	0	0.969778	0.0302222
40	0.0461111	0	0	0.0423333	0.911556	0.0884444
40.5	0	0	0	0	1	0
41	0	0	0	0	1	0
41.5	0.103889	0.0504444	0.0315556	0.122556	0.691556	0.308444
42	0.021	0.00988889	0.014	0.079	0.876111	0.123889
42.5	0.00255556	0.000333333	0	0.00422222	0.992889	0.00711111
43	0.135778	0.503778	0.0521111	0.308333	0	1
43.5	0.163667	0.584	0.0507778	0.201556	0	1
44	0.159222	0.220889	0.00744444	0.436333	0.176111	0.823889
44.5	0.0917778	0.635333	0.0546667	0.189111	0.0291111	0.970889
45	0.141222	0.559556	0.0722222	0.227	0	1
45.5	0.0604444	0.675667	0.0493333	0.214556	0	1
46	0.0528889	0.636333	0.036	0.274778	0	1
46.5	0.127	0.433667	0.0311111	0.408222	0	1
47	0.141111	0.410222	0.0168889	0.336333	0.0954444	0.904556
47.5	0.0108889	0.00733333	0.00577778	0.0105556	0.965444	0.0345556
48	0.0793333	0.632222	0.0952222	0.193222	0	1
48.5	0.181222	0.427111	0.109444	0.168111	0.114111	0.885889
49	0.00355556	0	0	0	0.996444	0.00355556
49.5	0.00177778	0.000111111	0	0	0.998111	0.00188889
50	0.014	0	0	0.00222222	0.983778	0.0162222
50.5	0.0541111	0.0654444	0.0234444	0.0315556	0.825444	0.174556
51	0	0.000111111	0	0	0.999889	0.000111111
51.5	0.0304444	0	0	0.0148889	0.954667	0.0453333
52	0.00566667	0.000111111	0	0.0702222	0.924	0.076
52.5	0	0	0	0	1	0
53	0	0	0	0	1	0
53.5	0	0	0	0	1	0
54	0	0	0	0	1	0
54.5	0	0.0125556	0.00988889	0.159	0.818556	0.181444
55	0.0306667	0.000222222	0	0.06	0.909111	0.0908889
55.5	0.00188889	0	0	0	0.998111	0.00188889
56	0.0574444	0.00511111	0	0.0137778	0.923667	0.0763333
56.5	0.0492222	0	0	0.158222	0.792556	0.207444
57	0.139111	0.162222	0.0471111	0.286111	0.365444	0.634556
57.5	0.129	0.332778	0.0115556	0.526667	0	1
58	0.0744444	0.717	0.0986667	0.109889	0	1
58.5	0.0694444	0.714444	0.0958889	0.120222	0	1
59	0.100222	0.695111	0.0687778	0.135889	0	1
59.5	0.150556	0.210111	0.0255556	0.194333	0.419444	0.580556
60	0	0	0	0	1	0
60.5	0	0	0	0	1	0
61	0.0531111	0.000444444	0	0.0343333	0.912111	0.0878889
61.5	0.0483333	0.00477778	0	0.0432222	0.903667	0.0963333
62	0.0151111	0.0493333	0.0452222	0.0328889	0.857444	0.142556
62.5	0.013	0	0	0	0.987	0.013
63	0.130333	0	0	0.0425556	0.827111	0.172889
63.5	0	0	0	0	1	0
64	0	0.000111111	0	0	0.999889	0.000111111
64.5	0.0345556	0.081	0.0141111	0.0356667	0.834667	0.165333
65	0.0188889	0.0503333	0	0.075	0.855778	0.144222
65.5	0	0	0	0	1	0
66	0.107556	0.00388889	0	0.0314444	0.857111	0.142889
66.5	0.0995556	0.588333	0.0357778	0.276333	0	1
67	0.0745556	0.275444	0.0191111	0.136	0.494889	0.505111
67.5	0.098	0.587778	0.0631111	0.137333	0.113778	0.886222
68	0.0806667	0.653556	0.0741111	0.191667	0	1
68.5	0.166444	0.552333	0.110333	0.170889	0	1
69	0.0355556	0.626333	0.122111	0.216	0	1
69.5	0.103444	0.3	0.0518889	0.287556	0.257111	0.742889
70	0.0887778	0.594222	0.071	0.246	0	1
70.5	0.0452222	0.414667	0.0411111	0.274222	0.224778	0.775222
71	0.081	0.606111	0.0854444	0.227444	0	1
71.5	0.157667	0.543556	0.126333	0.172444	0	1
72	0.0658889	0.596111	0.0907778	0.247222	0	1
72.5	0.0894444	0.242333	0.108222	0.286667	0.273333	0.726667
73	0.0537778	0.435333	0.0336667	0.214889	0.262333	0.737667
73.5	0.0268889	0.00133333	0	0.021	0.950778	0.0492222
74	0.00177778	0	0	0	0.998222	0.00177778
74.5	0.137222	0.0123333	0.0593333	0.138	0.653111	0.346889
75	0.00188889	0	0	0	0.998111	0.00188889
75.5	0	0	0	0	1	0
76	0	0	0	0	1	0
76.5	0.0271111	0	0	0	0.972889	0.0271111
77	0	0	0	0	1	0
77.5	0	0	0	0	1	0
78	0	0	0	0	1	0
78.5	0	0	0	0	1	0
79	0	0	0	0	1	0
79.5	0	0.000111111	0	0	0.999889	0.000111111
80	0.0131111	0.000888889	0	0.0401111	0.945889	0.0541111
80.5	0.0868889	0.0335556	0.0182222	0.415556	0.445778	0.554222
81	0.103	0.411	0.0362222	0.449778	0	1
81.5	0.108889	0.419778	0.0147778	0.248778	0.207778	0.792222
82	0.0778889	0.699889	0.103444	0.118778	0	1
82.5	0.112222	0.682444	0.076	0.129333	0	1
83	0.0785556	0.667556	0.114	0.139889	0	1
83.5	0.159556	0.612222	0.0461111	0.182111	0	1
84	0.06	0.0266667	0.00211111	0.0264444	0.884778	0.115222
84.5	0	0	0	0	1	0
85	0	0	0	0	1	0
85.5	0.00177778	0.000222222	0	0.062	0.936	0.064
86	0.0666667	0.113333	0.0561111	0.105778	0.658111	0.341889
86.5	0.0668889	0	0	0.0127778	0.920333	0.0796667
87	0	0	0	0	1	0
87.5	0.0166667	0.0116667	0.0128889	0.116667	0.842111	0.157889
88	0	0.000111111	0	0	0.999889	0.000111111
88.5	0.0368889	0.000222222	0	0.00966667	0.953222	0.0467778
89	0.013	0.00188889	0	0.0164444	0.968667	0.0313333
89.5	0	0	0	0	1	0
90	0	0	0	0	1	0
90.5	0.152444	0.0711111	0.049	0.309	0.418444	0.581556
91	0.097	0.00522222	0	0.352556	0.545222	0.454778
91.5	0.0567778	0.211	0.00811111	0.101222	0.622889	0.377111
92	0.168222	0.598222	0.0846667	0.148889	0	1
92.5	0.069	0.671444	0.0984444	0.161111	0	1
93	0.158222	0.584778	0.0606667	0.196333	0	1
93.5	0.0738889	0.636889	0.0815556	0.207667	0	1
94	0.0673333	0.553778	0.0268889	0.352	0	1
94.5	0.0884444	0.469111	0.0566667	0.313667	0.0721111	0.927889
95	0.107444	0.285889	0.0813333	0.0915556	0.433778	0.566222
95.5	0.0262222	0.152111	0.0341111	0.166667	0.620889	0.379111

## Sheet: F4F
Figure 4F
	Fraction of time spent in behaviors (wt)
time(hours)	shuffled grooming	modified locomotion	modified wake
0	0.09178	0.396442	0.977776
0.5	0.00256	0.139996	0.352329
1	0	0.00966667	0.0191111
1.5	0.10744	0.210338	0.368671
2	0.10489	0.664777	1.031
2.5	0.18122	-0.154109	-0.13322
3	0.097	-0.097	-0.097
3.5	0	0.158778	0.450889
4	0.08678	0.244998	0.594553
4.5	0.07533	-0.0735522	-0.0717744
5	0	0.0687778	0.143889
5.5	0.05744	-0.05744	-0.05744
6	0	0.0365556	0.206889
6.5	0.12344	-0.0985511	-0.0672178
7	0.018	-0.018	-0.018
7.5	0	0	0
8	0	0	0
8.5	0	0	0
9	0.15767	-0.137448	-0.115337
9.5	0.013	0.00855556	0.027
10	0.02122	0.731002	1.04378
10.5	0.15956	0.35144	0.536107
11	0	0	0
11.5	0.05411	-0.05411	-0.05411
12	0	0	0
12.5	0	0	0
13	0	0	0
13.5	0.08844	-0.08844	-0.08844
14	0.00356	-0.00356	-0.00356
14.5	0	0	0
15	0.03067	-0.03067	-0.03067
15.5	0.00822	-0.00822	-0.00822
16	0.06878	-0.06878	-0.06878
16.5	0.00567	-0.00567	-0.00567
17	0.07856	-0.0784489	-0.0784489
17.5	0.05311	-0.05311	-0.05311
18	0	0	0
18.5	0.03022	-0.03022	-0.03022
19	0	0.440667	0.676444
19.5	0.01511	0.230112	0.621779
20	0	0	0
20.5	0.16822	-0.0689978	0.279669
21	0	0.0164444	0.0328889
21.5	0.01989	0.705666	1.09
22	0	0.634	1.06467
22.5	0.08067	0.275997	1.02422
23	0	0.594667	1.07533
23.5	0.15244	0.176338	0.49656
24	0.04522	0.458002	1.00945
24.5	0.06344	0.621004	1.05545
25	0	0.591778	1.06933
25.5	0	0	0
26	0	0.00166667	0.00333333
26.5	0.00189	-0.00189	-0.00189
27	0.02689	-0.0236678	-0.0204456
27.5	0	0.0523333	0.154333
28	0	0.018	0.130556
28.5	0.081	-0.081	-0.081
29	0.09033	-0.09033	-0.09033
29.5	0.14111	-0.14111	-0.14111
30	0.051	-0.051	-0.051
30.5	0	0	0
31	0	0	0
31.5	0	0	0
32	0.013	-0.008	-0.00477778
32.5	0	0	0
33	0.07389	-0.0452233	0.02311
33.5	0.01311	0.42389	1.00322
34	0.05244	0.746227	1.00289
34.5	0.00178	0.738553	1.07055
35	0	0.524222	0.902556
35.5	0.16367	-0.16367	-0.16367
36	0	0	0
36.5	0	0.0405556	0.125444
37	0.157	-0.128889	-0.0993333
37.5	0.09956	-0.09956	-0.09956
38	0.03033	0.00778111	0.08567
38.5	0	0.164222	0.420111
39	0.06044	-0.06044	-0.06044
39.5	0	0.0302222	0.0604444
40	0.07444	-0.0283289	0.0601156
40.5	0	0	0
41	0.00311	-0.00311	-0.00311
41.5	0.069	0.0853333	0.343333
42	0	0.0308889	0.144889
42.5	0	0.00288889	0.00966667
43	0.02144	0.618116	1.11434
43.5	0	0.747667	1.16367
44	0.13589	0.244221	0.847221
44.5	0.05289	0.674221	1.00978
45	0.14122	0.559558	1
45.5	0.09544	0.640671	0.965004
46	0.07933	0.609892	0.973559
46.5	0.014	0.546667	1.113
47	0.05378	0.497553	0.991887
47.5	0.02733	-0.00910778	0.0181144
48	0.06689	0.644666	1.01244
48.5	0.05533	0.553003	1.01178
49	0.03689	-0.0333344	-0.0297789
49.5	0	0.00188889	0.00366667
50	0	0.014	0.0302222
50.5	0	0.119556	0.228667
51	0.00178	-0.00166889	-0.00166889
51.5	0.16956	-0.139116	-0.0937822
52	0.00322	0.00255778	0.0784467
52.5	0.10344	-0.10344	-0.10344
53	0.00189	-0.00189	-0.00189
53.5	0.00178	-0.00178	-0.00178
54	0.129	-0.129	-0.129
54.5	0.02622	-0.0136644	0.155224
55	0.04922	-0.0183311	0.0723356
55.5	0.03556	-0.0336711	-0.0317822
56	0	0.0625556	0.133778
56.5	0	0.0492222	0.256667
57	0	0.301333	0.773667
57.5	0	0.461778	1.129
58	0	0.791444	1.07444
58.5	0	0.783889	1.06944
59	0.13578	0.659553	0.964442
59.5	0.13033	0.230337	0.600781
60	0.03044	-0.03044	-0.03044
60.5	0	0	0
61	0.16644	-0.112884	-0.02544
61.5	0.065	-0.0118889	0.0796667
62	0.103	-0.0385556	0.0546667
62.5	0	0.013	0.026
63	0.11556	0.0147733	0.187662
63.5	0.06467	-0.06467	-0.06467
64	0.02689	-0.0267789	-0.0267789
64.5	0.06944	0.0461156	0.130449
65	0.10156	-0.0323378	0.0615511
65.5	0.08944	-0.08944	-0.08944
66	0.13722	-0.0257756	0.113224
66.5	0.10022	0.587669	0.999336
67	0.11889	0.23111	0.460777
67.5	0.03456	0.651218	0.949662
68	0.10756	0.626662	0.973107
68.5	0.04611	0.672668	1.12033
69	0.10778	0.554109	0.927776
69.5	0.01667	0.386774	0.829663
70	0	0.683	1.08878
70.5	0.021	0.438889	0.799444
71	0.04	0.647111	1.041
71.5	0.15056	0.550662	1.00711
72	0.13911	0.52289	0.926779
72.5	0.15822	0.173558	0.657891
73	0.02811	0.461001	0.763334
73.5	0.01644	0.0117822	0.0596711
74	0.06	-0.0582222	-0.0564444
74.5	0.10989	0.0396656	0.374221
75	0.04833	-0.0464411	-0.0445522
75.5	0.00167	-0.00167	-0.00167
76	0	0	0
76.5	0.00178	0.0253311	0.0524422
77	0	0	0
77.5	0	0	0
78	0	0	0
78.5	0.05678	-0.05678	-0.05678
79	0.08689	-0.08689	-0.08689
79.5	0	0.000111111	0.000111111
80	0.127	-0.113	-0.0597778
80.5	0.01889	0.101554	0.622221
81	0.10889	0.40511	0.99411
81.5	0	0.528667	0.901111
82	0.10389	0.673888	0.973999
82.5	0.01089	0.783777	1.10133
83	0	0.746111	1.07856
83.5	0	0.771778	1.15956
84	0	0.0866667	0.175222
84.5	0.098	-0.098	-0.098
85	0.07456	-0.07456	-0.07456
85.5	0	0.002	0.0657778
86	0.05133	0.12867	0.357226
86.5	0.06667	0.000218889	0.0798856
87	0.08878	-0.08878	-0.08878
87.5	0.21356	-0.185227	-0.0390044
88	0	0.000111111	0.000111111
88.5	0.06956	-0.0324489	0.0141067
89	0	0.0148889	0.0443333
89.5	0.15922	-0.15922	-0.15922
90	0	0	0
90.5	0.07789	0.145666	0.65611
91	0.06589	0.0363322	0.485888
91.5	0.07233	0.195448	0.361559
92	0	0.766444	1.16822
92.5	0	0.740444	1.069
93	0	0.743	1.15822
93.5	0.11222	0.598558	0.961669
94	0.019	0.602111	1.04833
94.5	0	0.557556	1.01633
95	0.02711	0.366223	0.646557
95.5	0.06733	0.111003	0.338003
