# Supplementary material for: Automated analysis of long-term grooming behavior in Drosophila using a k-nearest neighbors classifier
Source: eLife. 2018 Feb 27;7:e34497. doi: 10.7554/eLife.34497 (PMC5860874; doi:10.7554/eLife.34497)
Supplement: Figure 4—source data 2. [file elife-34497-fig4-data2.xlsx]

## Sheet: F4-S1BC
Fig 4-supplement 1B,C
Fraction of time spent in behaviors
grooming	locomotion	sleep	short rest	feeding
0.0775255	0.237377	0.523731	0.14231	0.0226296
0.0635741	0.228477	0.548595	0.145326	0.0205556
0.131512	0.0561343	0.718792	0.0958449	0.0023588
0.11656	0.294734	0.298176	0.246859	0.0464745
0.111678	0.199708	0.460412	0.199146	0.0336481
0.0968056	0.273	0.378354	0.226167	0.0299375
0.117032	0.212417	0.409894	0.213079	0.0502731
0.0870903	0.166449	0.621769	0.108954	0.0194977
0.195796	0.121141	0.521681	0.137412	0.0250856
0.114984	0.308931	0.336347	0.192336	0.0514352
0.117722	0.173528	0.470646	0.187833	0.0540324
0.161514	0.12294	0.549894	0.154389	0.0201574
0.16806	0.168257	0.420847	0.218812	0.0287407
0.132593	0.194546	0.492185	0.162021	0.0208287
0.110491	0.251451	0.420403	0.173556	0.054088
0.119815	0.129986	0.624387	0.0968634	0.0332477
0.0732616	0.204748	0.561727	0.155611	0.00859491
0.0689259	0.151644	0.59641	0.155852	0.0363264
0.0891343	0.179201	0.559928	0.15628	0.019581
0.0840023	0.368602	0.190606	0.28466	0.0806227
0.0727014	0.167576	0.619326	0.117859	0.030625
0.0754583	0.181447	0.583854	0.146396	0.0250718
0.0825995	0.106356	0.640586	0.134685	0.0407431
0.0947708	0.179627	0.507255	0.186632	0.0471921
0.0903819	0.136192	0.585819	0.172757	0.0243125
0.0718796	0.10472	0.71416	0.108285	0.015875
0.0654329	0.220044	0.533586	0.182868	0.00724306
0.0726481	0.127951	0.639002	0.140245	0.0262616
0.0622431	0.115715	0.705498	0.114664	0.014669
0.0937593	0.106641	0.616481	0.153472	0.0324028
0.0695625	0.161704	0.614604	0.140125	0.0276204
0.0681505	0.125343	0.676218	0.111028	0.0247546
0.0691574	0.113632	0.682764	0.107931	0.0427801
0.0957384	0.200808	0.415468	0.24935	0.04925
0.0708981	0.1704	0.651407	0.106741	0.0154375
0.0597269	0.271907	0.490593	0.14665	0.0409213
0.0948704	0.200937	0.464326	0.195713	0.0570162
0.135213	0.182539	0.468269	0.182926	0.0394769
0.102477	0.137169	0.548731	0.153947	0.068544
0.0880301	0.265076	0.379231	0.191271	0.0861991
0.125127	0.164271	0.540505	0.176988	0.024419
0.0586551	0.196389	0.575843	0.142701	0.035662
0.10037	0.178127	0.511245	0.152347	0.0656273
0.0995394	0.0805856	0.703708	0.104345	0.0256181
0.100597	0.279574	0.397734	0.157544	0.0692708
0.0728218	0.17631	0.60735	0.133169	0.0368681
0.0475162	0.146039	0.712176	0.0814259	0.0167986
0.0759653	0.310252	0.351532	0.230993	0.0436505
0.0713032	0.182801	0.523083	0.170917	0.0660324
0.0937755	0.156035	0.527109	0.17315	0.0644722
0.0989606	0.220542	0.500993	0.171664	0.0120903
0.0813009	0.181965	0.578683	0.171595	0.00951157
0.0976273	0.275493	0.32478	0.247456	0.0648194
0.109942	0.230847	0.409123	0.219826	0.0388611
0.0612083	0.17531	0.623907	0.128778	0.016588
0.0719051	0.144007	0.623431	0.14138	0.0278588
0.0528356	0.293354	0.469569	0.151322	0.0470694
0.0764977	0.2324	0.503519	0.177375	0.0207963
0.0864398	0.26187	0.418352	0.202042	0.0485116
0.0701644	0.291317	0.423718	0.193602	0.0253056
0.0687523	0.206414	0.513	0.195204	0.0327361
0.0731412	0.157352	0.628243	0.124236	0.0212731
0.11034	0.201877	0.414509	0.242604	0.0397616
0.072412	0.228928	0.556081	0.134236	0.0159444
0.104294	0.195035	0.503428	0.173046	0.0295231
0.114542	0.116468	0.557095	0.193852	0.028331
0.0925602	0.246502	0.484977	0.175808	0.0134097
0.0831968	0.218773	0.53535	0.141808	0.0260509
0.123046	0.152553	0.582144	0.138525	0.0105093
0.146687	0.185308	0.511634	0.150495	0.0100394
0.0747431	0.108826	0.676282	0.115544	0.0278912
0.0733079	0.292576	0.47891	0.147796	0.0152176
0.0895046	0.186072	0.587352	0.12194	0.0197153
0.081537	0.100361	0.702132	0.113132	0.00938194
0.0786296	0.0967014	0.658838	0.164289	0.00651157
0.0859306	0.180451	0.557852	0.166579	0.0154861

## Sheet: F4S1D
Fig 4-supplement 1D
r-value	Probability
	Grooming vs Short Rest	Locomotion vs feeding
-0.99	0	0
-0.98	0	0
-0.97	0	0
-0.96	0	0
-0.95	0	0
-0.94	0	0
-0.93	0	0
-0.92	0	0
-0.91	0	0
-0.9	0	0
-0.89	0	0
-0.88	0	0
-0.87	0	0
-0.86	0	0
-0.85	0	0
-0.84	0	0
-0.83	0	0
-0.82	0	0
-0.81	0	0
-0.8	0	0
-0.79	0	0
-0.78	0	0
-0.77	0	0
-0.76	0	0
-0.75	0	0
-0.74	0	0
-0.73	0	0
-0.72	0	0
-0.71	0	0
-0.7	0	0
-0.69	0	0
-0.68	0	0
-0.67	0	0
-0.66	0	0
-0.65	0	0
-0.64	0	0
-0.63	0	0
-0.62	0	0
-0.61	0	0
-0.6	0	0
-0.59	0	0
-0.58	0	0
-0.57	0	0
-0.56	0	0
-0.55	0	0
-0.54	0	0
-0.53	0	0
-0.52	0	0
-0.51	0	0
-0.5	0	0
-0.49	0	0
-0.48	0	0
-0.47	0	0
-0.46	0	0
-0.45	0	0
-0.44	1e-05	0
-0.43	1e-05	0
-0.42	0	1e-05
-0.41	4e-05	0
-0.4	1e-05	2e-05
-0.39	8e-05	1e-05
-0.38	9e-05	5e-05
-0.37	9e-05	6e-05
-0.36	0.00017	6e-05
-0.35	0.00019	0.00013
-0.34	0.00031	0.0001
-0.33	0.0004	0.00026
-0.32	0.00052	0.00041
-0.31	0.00072	0.00065
-0.3	0.00082	0.00076
-0.29	0.00101	0.001
-0.28	0.00125	0.00107
-0.27	0.00168	0.00166
-0.26	0.00211	0.00176
-0.25	0.00262	0.00253
-0.24	0.00343	0.00332
-0.23	0.00404	0.00388
-0.22	0.00503	0.00541
-0.21	0.00641	0.00624
-0.2	0.0069	0.00681
-0.19	0.0082	0.00769
-0.18	0.00968	0.00968
-0.17	0.01131	0.0111
-0.16	0.0127	0.01377
-0.15	0.01434	0.01448
-0.14	0.01601	0.01707
-0.13	0.01852	0.01877
-0.12	0.02057	0.02054
-0.11	0.02199	0.02204
-0.1	0.0244	0.02533
-0.09	0.02608	0.0267
-0.08	0.02754	0.02752
-0.07	0.02921	0.02971
-0.06	0.03103	0.03152
-0.05	0.03239	0.03383
-0.04	0.03356	0.03337
-0.03	0.03489	0.03501
-0.02	0.03636	0.0368
-0.01	0.03706	0.03653
8.88178e-16	0.03611	0.03567
0.01	0.03721	0.03534
0.02	0.03436	0.03572
0.03	0.03452	0.03356
0.04	0.03484	0.03258
0.05	0.03298	0.03232
0.06	0.03129	0.02998
0.07	0.02886	0.02876
0.08	0.02736	0.02673
0.09	0.0256	0.02485
0.1	0.02376	0.02348
0.11	0.02165	0.0211
0.12	0.0206	0.02043
0.13	0.01804	0.01818
0.14	0.01618	0.0163
0.15	0.01395	0.01463
0.16	0.0128	0.01247
0.17	0.01117	0.01119
0.18	0.01032	0.00982
0.19	0.00798	0.00894
0.2	0.00675	0.00675
0.21	0.00597	0.0065
0.22	0.00482	0.00523
0.23	0.00367	0.00416
0.24	0.00336	0.00337
0.25	0.00274	0.00308
0.26	0.0021	0.00241
0.27	0.00184	0.00202
0.28	0.00117	0.00173
0.29	0.0011	0.00124
0.3	0.00081	0.00106
0.31	0.00063	0.00081
0.32	0.00045	0.00054
0.33	0.00034	0.00032
0.34	0.00027	0.00026
0.35	0.00021	0.00029
0.36	0.00016	0.00012
0.37	5e-05	0.00013
0.38	5e-05	9e-05
0.39	4e-05	9e-05
0.4	5e-05	4e-05
0.41	2e-05	2e-05
0.42	1e-05	1e-05
0.43	0	1e-05
0.44	0	1e-05
0.45	2e-05	0
0.46	0	0
0.47	0	0
0.48	1e-05	0
0.49	0	0
0.5	0	0
0.51	0	0
0.52	0	0
0.53	0	0
0.54	0	0
0.55	0	0
0.56	0	0
0.57	0	0
0.58	0	0
0.59	0	0
0.6	0	0
0.61	0	0
0.62	0	0
0.63	0	0
0.64	0	0
0.65	0	0
0.66	0	0
0.67	0	0
0.68	0	0
0.69	0	0
0.7	0	0
0.71	0	0
0.72	0	0
0.73	0	0
0.74	0	0
0.75	0	0
0.76	0	0
0.77	0	0
0.78	0	0
0.79	0	0
0.8	0	0
0.81	0	0
0.82	0	0
0.83	0	0
0.84	0	0
0.85	0	0
0.86	0	0
0.87	0	0
0.88	0	0
0.89	0	0
0.9	0	0
0.91	0	0
0.92	0	0
0.93	0	0
0.94	0	0
0.95	0	0
0.96	0	0
0.97	0	0
0.98	0	0
0.99	0	0
