# Supplementary material for: Automated analysis of long-term grooming behavior in Drosophila using a k-nearest neighbors classifier
Source: eLife. 2018 Feb 27;7:e34497. doi: 10.7554/eLife.34497 (PMC5860874; doi:10.7554/eLife.34497)
Supplement: Figure 4—source data 3. [file elife-34497-fig4-data3.xlsx]

## Sheet: F4-S2B
Fig 4-supplement 2B
Distribution of intervals between bouts (mins)
Bin (mins)	Grooming	Locomotion
0	0.96906	0.98501
20	0.0189	0.00657
40	0.00719	0.00383
60	0.00265	0.00188
80	0.00104	0.00116
100	0.000475596	0.000698095
120	0.000356697	0.000424332
140	0.000118899	0.000150569
160	0.000148624	0.000136881
180	5.94495e-05	5.47525e-05
200	0	1.36881e-05
220	0	0
240	0	1.36881e-05
260	0	2.73763e-05
280	0	0
300	0	1.36881e-05
320	0	0
340	0	0
360	0	0
380	0	0
400	0	0
420	0	1.36881e-05
440	0	0
460	0	0
480	0	0
500	0	0
520	0	0
540	0	0
560	0	0
580	0	0

## Sheet: F4-S2C
Fig 4-supplement 2C
Longest interval (mins)
Grooming	Locomotion
78.4733	79.6967
108.253	126.063
66.6267	117.233
128.08	137.193
129.277	105.083
60.16	68.88
92	86.6367
72.5267	72.6333
87.16	123.18
38.53	89.2567
103.447	107.167
132.467	152.37
134.407	139.757
83.7867	125.993
150.91	156.69
64.02	72.8067
67.47	104.687
138.183	190.023
75.0967	144.447
66.8367	87.3667
165.417	170.323
77.5033	171.683
85.5267	106.63
100.717	130.89
50.9333	108.72
79.7967	140.97
35.3333	60.3167
158.443	279.247
88.2533	140.53
39.1033	77.0033
100.653	301.737
84.96	112.107
77.4633	82.9567
63.27	87.2633
58.2667	87.17
106.983	120.403
93.5533	84.96
149.293	168.567
107.67	114.143
61.7267	102.26
85.4733	207.737
166.593	172.01
60.82	172.917
90.0433	144.493
122.36	180.947
73.7533	122.75
180.49	437.16
71.9833	161.903
73.6033	111.597
118.767	193.12
69.6767	260.04
189.083	258.15
70.3567	191.043
90.0767	128.933
55.8933	131.793
70.07	179.413
53.7	83.77
62.6967	74.06
58.5	70.13
171.16	146.217
171.217	177.89
83.9933	130.37
80.5833	130.333
85.4467	130.577
46.0333	90.0133
77.1933	96.3833
100.447	101.143
37.9333	78.7733
55.2567	92.7867
56.81	116.987
81.4867	130.683
52.82	75.88
59.3133	155.06
131.6	132.2
58.9733	143.297
82.8833	93.6467
85.8333	134.78
78.5867	112.28
61.9867	132.887
77.73	78.5733
56.9867	89.8867
62.5567	84.59
53.5733	134.573

## Sheet: F4-S2D
Fig 4-supplement 2D
Distribution of bout duration(mins)
Bin (mins)	Grooming	Locomotion
0	0.67524	0.35967
0.2	0.17073	0.26128
0.4	0.06959	0.15331
0.6	0.03374	0.08048
0.8	0.02123	0.04984
1	0.01254	0.03065
1.2	0.00798	0.01969
1.4	0.00368	0.01363
1.6	0.00246	0.00906
1.8	0.0013	0.00603
2	0.000741268	0.00477
2.2	0.000326158	0.00319
2.4	0.000118603	0.00206
2.6	0.000177904	0.00153
2.8	8.89521e-05	0.00116
3	0	0.000957082
3.2	2.96507e-05	0.000437523
3.4	0	0.000601594
3.6	0	0.000328142
3.8	0	0.000300797
4	2.96507e-05	0.000191416
4.2	0	0.000246107
4.4	0	0.000123053
4.6	0	0.000136726
4.8	0	5.46904e-05
5	0	6.8363e-05
5.2	0	4.10178e-05
5.4	0	4.10178e-05
5.6	0	6.8363e-05
5.8	0	1.36726e-05
6	0	0
6.2	0	0
6.4	0	0
6.6	0	0
6.8	0	0
7	0	1.36726e-05
7.2	0	0
7.4	0	0
7.6	0	1.36726e-05
7.8	0	0
8	0	0
8.2	0	0
8.4	0	0
8.6	0	0
8.8	0	0
9	0	0
9.2	0	0
9.4	0	0
9.6	0	0
9.8	0	0

## Sheet: F4-S2E
Fig 4-supplement 2E
Longest duration (mins)
Grooming	Locomotion
1.96333	5.49333
2.92333	3.58333
1.84667	3.28333
2.60333	3.8
2	4.78333
2.01667	4.86667
2.11	2.05
1.68333	5.70333
2.09333	2.75667
2.21667	4.79
2.40333	2.00667
1.70667	3.43333
1.72667	3.74667
2.21	5.03333
2.76	4.06
1.62333	2.71333
1.68	5.48333
1.88	2.17333
2.32667	4.35333
1.78	2.12333
1.58667	2.57333
2.09667	4.49667
2.24333	3.99667
1.36667	7.16667
1.42	2.19
2.01333	2.51333
2.68333	2.51333
2.09	3.83333
2.08	2.63667
1.79333	3.69
1.93333	3.49
1.53	4.4
1.68	2.23333
2.15667	2.78667
3.21333	5.28
2.96667	2.13333
1.75	5.71333
1.16667	2.69333
2.00667	5.18667
2.01667	1.56667
1.77667	3.81667
1.84333	2.61667
1.54667	3.58667
1.94333	3.04
2.21333	4.18333
1.58667	3.47333
1.92667	1.8
1.98	2.36
2.81667	10.47
1.97333	3.60667
1.39667	2.43333
1.36667	2.41667
2.28	3.50667
1.52333	4.57
1.44333	4.36333
2.68333	3.84
1.92333	2.87333
1.89667	4.11667
2.63333	3.75667
1.35	3.29333
2.08667	3.65
1.8	4.31333
1.29667	3.90667
1.43333	3.02333
1.61333	3.72667
1.43333	3.55
4.02333	3.53667
2.50333	5.68
1.41667	7.66333
1.73	3.49333
1.47667	2.84
1.54	4.27333
1.90333	4.38
1.43667	3.55333
2.38667	4.12
2.01333	5.27667
1.37	5.70667
1.75333	2.59667
2.56	3.90667
1.35667	2.78
1.67667	3.05667
1.38667	2.96
1.51	3.82

## Sheet: F4-S2F
Fig 4-supplement 2F
T(hours)	rawGrooming	FitGrooming
0	0.15867	0.13062
0.5	0.15978	0.12205
1	0.12767	0.11353
1.5	0.04389	0.10507
2	0.11356	0.09666
2.5	0.11511	0.08829
3	0.104	0.07998
3.5	0.09567	0.07172
4	0.12644	0.06351
4.5	0	0.05534
5	0.02078	0.04723
5.5	0.04467	0.03917
6	0.04078	0.03115
6.5	0.06633	0.02318
7	0.00233	0.01526
7.5	0.051	0.00739
8	0.07478	2.36778e-06
8.5	0.023	4.2135e-05
9	0.03867	9.1135e-05
9.5	0	0.000151511
10	0.09911	0.000225904
10.5	0.00233	0.00321
11	0.00967	0.00937
11.5	0.00433	0.02181
12	0.12667	0.04705
12.5	0.10067	0.09833
13	0.183	0.19599
13.5	0.181	0.14817
14	0.05722	0.11233
14.5	0.12278	0.08553
15	0.13733	0.06559
15.5	0.053	0.05087
16	0	0.04013
16.5	0.00244	0.03249
17	0.09833	0.02728
17.5	0.02267	0.02401
18	0.02089	0.02237
18.5	0.03989	0.02214
19	0	0.02321
19.5	0.09289	0.02554
20	0	0.02918
20.5	0.02333	0.03424
21	0.04911	0.04091
21.5	0.08756	0.04945
22	0.00767	0.06023
22.5	0.08778	0.07368
23	0.03633	0.09041
23.5	0.20467	0.11111
24	0.112	0.12918
24.5	0.07944	0.12063
25	0.10233	0.11212
25.5	0.06744	0.10366
26	0.13256	0.09526
26.5	0.14733	0.0869
27	0.11867	0.0786
27.5	0.08411	0.07035
28	0.12189	0.06214
28.5	0.03011	0.05399
29	0.00189	0.04588
29.5	0.04889	0.03783
30	0.03467	0.02982
30.5	0.02067	0.02186
31	0.08167	0.01395
31.5	0	0.00608
32	0.00767	8.43278e-06
32.5	0.05822	4.96078e-05
33	0.00244	0.000100343
33.5	0.01389	0.000162857
34	0.03956	0.000531157
34.5	0.00878	0.00396
35	0.11678	0.01088
35.5	0.14267	0.02488
36	0.07089	0.05328
36.5	0.14656	0.111
37	0.197	0.18704
37.5	0.17944	0.14146
38	0.067	0.1073
38.5	0.16811	0.08178
39	0.02644	0.06281
39.5	0.04322	0.04883
40	0.029	0.03867
40.5	0.09367	0.03147
41	0.02522	0.02661
41.5	0.039	0.02363
42	0	0.02224
42.5	0.11089	0.02223
43	0	0.02351
43.5	0.01044	0.02606
44	0.03989	0.02992
44.5	0.05611	0.03524
45	0.07478	0.0422
45.5	0.018	0.05108
46	0.08933	0.06227
46.5	0.01911	0.07623
47	0.07422	0.09356
47.5	0.08089	0.11501
48	0.13911	0.12775
48.5	0.15989	0.1192
49	0.09822	0.11071
49.5	0.10133	0.10226
50	0.13056	0.09386
50.5	0.14678	0.08552
51	0.15978	0.07722
51.5	0.11789	0.06898
52	0.04289	0.06078
52.5	0.03378	0.05263
53	0.07344	0.04454
53.5	0.121	0.03649
54	0	0.02849
54.5	0.02589	0.02054
55	0.00811	0.01263
55.5	0.05644	0.00478
56	0.02344	1.47122e-05
56.5	0.07522	5.73456e-05
57	0.087	0.000109877
57.5	0	0.000174604
58	0.08811	0.000950821
58.5	0.053	0.00481
59	0.09911	0.01258
59.5	0.08033	0.02833
60	0.14289	0.06029
60.5	0.105	0.12526
61	0.16044	0.1785
61.5	0.18044	0.13506
62	0.05367	0.10251
62.5	0.09067	0.07821
63	0.11056	0.06017
63.5	0.00556	0.04689
64	0.02022	0.03728
64.5	0.09178	0.03051
65	0.006	0.02599
65.5	0.00622	0.0233
66	0.06444	0.02215
66.5	0	0.02236
67	0.22311	0.02385
67.5	0.06911	0.02661
68	0.01667	0.0307
68.5	0.08322	0.03628
69	0	0.04353
69.5	0.052	0.05278
70	0.05333	0.06439
70.5	0.08811	0.07886
71	0.043	0.09683
71.5	0.07289	0.11905

## Sheet: F4-S2G
Fig 4-supplement 2G
T(hours)	rawLocomotion	Fit_locomotion
0	0.66067	0.72508
0.5	0.58089	0.53733
1	0.61578	0.39776
1.5	0.42722	0.29402
2	0.00578	0.21691
2.5	0.02178	0.15959
3	0.18289	0.11699
3.5	0.09633	0.08532
4	0.05878	0.06178
4.5	0.00711	0.04428
5	0.09733	0.03127
5.5	0.09344	0.0216
6	0.03967	0.01442
6.5	0.08167	0.00907
7	0.000777778	0.0051
7.5	0.07678	0.00215
8	0.000777778	5.89869e-05
8.5	0.03444	0.00195
9	0.01611	0.00408
9.5	0.00911	0.17077
10	0.235	0.31939
10.5	0.44978	0.45203
11	0.55078	0.57057
11.5	0.83522	0.67668
12	0.73556	0.74487
12.5	0.41122	0.29746
13	0.08411	0.13476
13.5	0.00322	0.07852
14	0.00411	0.06248
14.5	0.23278	0.06204
15	0.00767	0.06812
15.5	0.022	0.07745
16	0.01478	0.0889
16.5	0.00156	0.1022
17	0.25922	0.11736
17.5	0	0.13455
18	0.01211	0.154
18.5	0.15578	0.17599
19	0.178	0.20087
19.5	0.00689	0.229
20	0.25344	0.2608
20.5	0.01344	0.29676
21	0.50222	0.33742
21.5	0.43522	0.38339
22	0.72378	0.43536
22.5	0.732	0.49413
23	0.77678	0.56058
23.5	0.70378	0.63572
24	0.65056	0.71076
24.5	0.528	0.52668
25	0.51578	0.38985
25.5	0.32956	0.28814
26	0.07689	0.21254
26.5	0.05189	0.15634
27	0.16089	0.11457
27.5	0.00867	0.08352
28	0.00733	0.06044
28.5	0.22667	0.04329
29	0.00211	0.03053
29.5	0.00267	0.02105
30	0.07556	0.01401
30.5	0.00589	0.00877
31	0.03233	0.00488
31.5	0.05656	0.00198
32	0.00411	0.000177688
32.5	0.04322	0.00208
33	0.03133	0.0158
33.5	0.04822	0.18122
34	0.30133	0.32871
34.5	0.52711	0.46035
35	0.57222	0.57801
35.5	0.80467	0.68335
36	0.67089	0.69923
36.5	0.01178	0.28071
37	0.13978	0.1288
37.5	0.01344	0.07661
38	0.25033	0.06212
38.5	0.00311	0.06229
39	0.26678	0.06866
39.5	0	0.07815
40	0.14833	0.08973
40.5	0.000111111	0.10315
41	0.00656	0.11844
41.5	0.03789	0.13577
42	0.08144	0.15538
42.5	0.08044	0.17756
43	0.000777778	0.20264
43.5	0.00644	0.231
44	0.30133	0.26306
44.5	0.07522	0.29932
45	0.65667	0.34031
45.5	0.64478	0.38666
46	0.667	0.43906
46.5	0.74944	0.49831
47	0.71533	0.56531
47.5	0.70667	0.64106
48	0.65644	0.69672
48.5	0.56844	0.51624
49	0.55133	0.38209
49.5	0.03189	0.28238
50	0.00478	0.20825
50.5	0.22189	0.15316
51	0.09144	0.1122
51.5	0.000333333	0.08176
52	0.05089	0.05913
52.5	0.01444	0.04231
53	0.01033	0.02981
53.5	0.00244	0.02052
54	0.15144	0.01361
54.5	0.00678	0.00847
55	0.000555556	0.00466
55.5	0.06133	0.00182
56	0.00911	0.000297364
56.5	0.058	0.00222
57	0.00289	0.02743
57.5	0.01533	0.19159
58	0.26911	0.33796
58.5	0.54133	0.46861
59	0.57667	0.5854
59.5	0.82833	0.68997
60	0.75389	0.65653
60.5	0.08222	0.26506
61	0.007	0.12324
61.5	0.11544	0.07486
62	0.20433	0.06182
62.5	0.01056	0.06258
63	0.04656	0.06921
63.5	0.22522	0.07886
64	0.00133	0.09057
64.5	0.18967	0.10411
65	0.00389	0.11953
65.5	0.00444	0.137
66	0.361	0.15678
66.5	0.00244	0.17914
67	0.00467	0.20442
67.5	0.45333	0.23302
68	0.14311	0.26534
68.5	0.05522	0.3019
69	0.50011	0.34322
69.5	0.66667	0.38995
70	0.55733	0.44279
70.5	0.70256	0.50253
71	0.77089	0.57008
71.5	0.72122	0.64645

## Sheet: F4-S2IJKLMN
Fig 4-supplement 2I 2J 2K 2L 2M 2N
Fig4-S2I			Fig4-S2J			Fig4-S2K			Fig4-S2L			Fig4-S2M			Fig4-S2N
bMR	bMR		TE	TE		bMD	bMD		bER	bER		bED	bED		TM	TM
Locomotion	Grooming		Locomotion	Grooming		Locomotion	Grooming		Locomotion	Grooming		Locomotion	Grooming		Locomotion	Grooming
0.0727	0.0079		1.9992	4.9992		-0.0053	0.0079		-0.0685	-0.0545		0.0284	0.0144		1.9992	3
0.0631	0.0053		1.92	3		-0.0129	-0.0079		0.0204	-0.0704		0.0022	0.0272		2.88	4.0008
0.02	0.0031		1.9992	3		-0.0095	-0.0193		0.0222	-0.0349		0.0014	0.0458		3	4.0008
0.06	0.0074		3	1.9992		0.0553	0.0017		-0.3384	-0.042		0.0069	0.0187		3	4.0008
0.0041	0.007		2	3		-0.001	-0.0002		0.004	-0.0237		0.0329	0.0095		6	6
0.0154	0.0054		3	3		0.0092	-0.0127		-0.0535	0.0092		0.0284	0.0256		3	3
0.0283	0.003		3	3		0.0009	0.0257		-0.0223	-0.018		0.023	0.0056		1.9992	4.0008
0.0075	0.0077		1.9992	4.9992		-0.0148	0.1099		-0.0072	-0.0116		0.0324	0.0149		3	1.9992
0.0204	0.0029		3	4.0008		0.0137	-0.015		-0.028	-0.0014		0.0163	0.0975		3	3

## Sheet: F4-S2P
Fig 4-supplement 2P
fly#	offset Gro-Loc	offset Feed-Gro
1	1.5	2
2	0	0
3	2	8
4	0.5	9
5	1	2
6	2	6
7	0	5
8	1	0
9	0.5	0
10	0.5	6
11	0	5
12	0	0
13	0	0
14	1	6
15	1	6
16	1	10
17	0	0
18	0	0
19	0.5	6
20	1	6
21	2	9
22	1	0
23	0.5	9
24	0.5	0
25	0	7
26	0.5	0
27	2	6
28	1	8
29	1	0
30	0.5	10
31	0.5	0
32	0	6
33	1	0
34	1	5
35	1.5	7
36	0.5	0
37	0	10
38	0	0
39	1	5
40	1	6
41	0.5	5
42	1	5
43	1	6
44	1	0
45	0	0
46	0.5	8
47	0.5	7
48	1	0
49	0	0
50	1.5	11
