# Supplementary material for: Automated analysis of long-term grooming behavior in Drosophila using a k-nearest neighbors classifier
Source: eLife. 2018 Feb 27;7:e34497. doi: 10.7554/eLife.34497 (PMC5860874; doi:10.7554/eLife.34497)
Supplement: Figure 5—source data 1. [file elife-34497-fig5-data1.xlsx]

## Sheet: F5A
Figure 5A
	Fraction of time spent in behaviors (wt)
Time(hours)	locomotion	sleep	short rest	feeding
0	0.0209583	0.239069	0.715236	0.00731944
0.5	0.00386111	0.649972	0.326597	0.00204167
1	0.0343889	0.638736	0.272444	0.0161944
1.5	0.0762778	0.713292	0.139611	0.0150556
2	0.0152222	0.899569	0.0563472	0.009125
2.5	0.0213056	0.822667	0.0868194	0.0117917
3	0.0119722	0.882917	0.0662083	0.00361111
3.5	0.0199722	0.824278	0.0807639	0.00515278
4	0.0645417	0.712986	0.173861	0.00825
4.5	0.270708	0.446403	0.169403	0.0187639
5	0.436194	0.189236	0.235139	0.0261667
5.5	0.4775	0.151042	0.2325	0.0294444
6	0.548403	0.0956528	0.215792	0.0390972
6.5	0.553583	0.0569167	0.215208	0.0451528
7	0.584556	0.0439167	0.197347	0.0342639
7.5	0.586306	0.0459722	0.202875	0.0486528
8	0.616944	0.0474583	0.199597	0.0216389
8.5	0.621889	0.0340278	0.191986	0.0467083
9	0.683444	0	0.169542	0.0300139
9.5	0.675833	0	0.174583	0.0448333
10	0.686431	0	0.167097	0.0406389
10.5	0.695	0	0.176014	0.0363056
11	0.636389	0.0697639	0.152222	0.03175
11.5	0.614667	0.0991667	0.161528	0.0393333
12	0.503583	0.182292	0.154528	0.0377917
12.5	0.398722	0.323944	0.159097	0.022125
13	0.321153	0.407653	0.183667	0.0160556
13.5	0.261458	0.441444	0.188069	0.0173889
14	0.202806	0.610208	0.118014	0.00663889
14.5	0.209153	0.608986	0.140778	0.00473611
15	0.182389	0.626875	0.116069	0.00531944
15.5	0.158	0.635319	0.140347	0.00875
16	0.143486	0.643681	0.141472	0.00552778
16.5	0.113458	0.667583	0.159958	0.00969444
17	0.0797361	0.770486	0.118292	0.00238889
17.5	0.0243333	0.857694	0.0772639	0.00373611
18	0.0616389	0.825639	0.0611528	0.0142917
18.5	0.0783333	0.716806	0.129944	0.0142222
19	0.204528	0.656375	0.0711528	0.0121111
19.5	0.382417	0.323278	0.183944	0.0147778
20	0.475167	0.0819306	0.284722	0.0267083
20.5	0.296514	0.381139	0.225167	0.0189306
21	0.174222	0.566319	0.178431	0.0170417
21.5	0.205264	0.451764	0.243806	0.0334306
22	0.0246111	0.920139	0.0343056	0.00441667
22.5	0.00465278	0.955958	0.0338194	0.00433333
23	0.00179167	0.947819	0.0255417	0.0100417
23.5	0.0329167	0.916208	0.0182361	0.0130694
24	0.00320833	0.947972	0.0315139	0
24.5	0.0436528	0.858264	0.0668611	0.011875
25	0.00113889	0.970528	0.0119861	0
25.5	0.0271806	0.791319	0.0977083	0.0118611
26	0.0165833	0.930278	0.02725	0.00297222
26.5	0.00180556	0.992875	0.00105556	0
27	0.0233194	0.928556	0.0249028	0.00275
27.5	0.0497083	0.747486	0.124375	0.0208194
28	0.138458	0.711153	0.066875	0.0145278
28.5	0.220653	0.483181	0.185056	0.02575
29	0.47325	0.155792	0.220056	0.0348472
29.5	0.441611	0.156083	0.233583	0.0377222
30	0.501194	0.109181	0.217486	0.0539444
30.5	0.461472	0.150208	0.243028	0.0351389
31	0.578403	0.004	0.250444	0.0528472
31.5	0.560625	0.0253889	0.229708	0.0634444
32	0.601472	0	0.238986	0.0522639
32.5	0.586194	0.0312639	0.215736	0.0487917
33	0.612042	0	0.215125	0.0351111
33.5	0.665042	0	0.199361	0.0351667
34	0.660986	0	0.1775	0.0483472
34.5	0.667569	0	0.180056	0.0469861
35	0.606528	0.0604861	0.178972	0.0518333
35.5	0.598236	0.0839722	0.19075	0.0355694
36	0.553917	0.124681	0.168069	0.0419861
36.5	0.525167	0.141444	0.190403	0.0344167
37	0.393611	0.258111	0.195403	0.0358611
37.5	0.422806	0.25	0.197792	0.0312639
38	0.367181	0.272069	0.218792	0.0273194
38.5	0.247153	0.542181	0.143306	0.0140556
39	0.200389	0.627222	0.123847	0.00926389
39.5	0.181736	0.648208	0.115847	0.00473611
40	0.119306	0.708889	0.128417	0.00695833
40.5	0.0536806	0.745333	0.155111	0.00784722
41	0.0179861	0.915778	0.0521528	0.000375
41.5	0.010625	0.935319	0.0399028	0.000972222
42	0.0204444	0.916194	0.0245694	0.0141806
42.5	0.0641806	0.798736	0.0783611	0.0165556
43	0.0817361	0.698639	0.15125	0.0125417
43.5	0.365972	0.276056	0.247889	0.0221944
44	0.366069	0.189333	0.280389	0.0247639
44.5	0.249972	0.377458	0.237708	0.019125
45	0.176903	0.565333	0.170778	0.0166389
45.5	0.0633472	0.791236	0.0882222	0.01075
46	0.129208	0.652167	0.113875	0.0267361
46.5	0.00929167	0.965292	0.00843056	0.00165278
47	5.56e-05	0.993528	0.00475	0
47.5	0.0251806	0.925069	0.00927778	0.0134028
48	0.0445	0.881181	0.0257361	0.0118611
48.5	0.00675	0.986083	0.00276389	0.000958333
49	0.00751389	0.889722	0.058375	0.00886111
49.5	0.00730556	0.920125	0.0479028	0.0105278
50	0.0235278	0.884319	0.0380972	0.00895833
50.5	0.0149444	0.885167	0.0642083	0.0179722
51	0.0314028	0.783236	0.118347	0.00855556
51.5	0.0385833	0.825111	0.083375	0.00893056
52	0.169625	0.609444	0.136486	0.0239444
52.5	0.218542	0.589153	0.119986	0.0154722
53	0.336028	0.402375	0.159028	0.0368194
53.5	0.42175	0.212653	0.198861	0.0410139
54	0.422819	0.222806	0.214111	0.0336806
54.5	0.396194	0.222833	0.218042	0.0272361
55	0.482833	0.124	0.236806	0.0354028
55.5	0.572875	0.0110139	0.245819	0.0479444
56	0.548208	0.0375417	0.238653	0.0354861
56.5	0.585833	0	0.2375	0.0424722
57	0.604847	0	0.237139	0.0295
57.5	0.623861	0	0.220778	0.0294861
58	0.631014	0	0.216986	0.0434444
58.5	0.640889	0.0239167	0.192181	0.0399306
59	0.579861	0.125	0.167667	0.043875
59.5	0.556847	0.124681	0.189319	0.0365417
60	0.562486	0.0719306	0.206625	0.0315139
60.5	0.531431	0.12525	0.210625	0.0324028
61	0.468458	0.157764	0.213833	0.0469306
61.5	0.373486	0.27075	0.214931	0.0392778
62	0.297236	0.462278	0.172583	0.0122222
62.5	0.223597	0.507139	0.164153	0.01425
63	0.252583	0.510653	0.146792	0.0214583
63.5	0.255181	0.482931	0.156583	0.0292639
64	0.100319	0.739306	0.117431	0.00340278
64.5	0.0704583	0.833417	0.0646528	0.00227778
65	0.0197639	0.917042	0.0573472	0.00161111
65.5	0.0151528	0.949792	0.0206667	0.000375
66	0.0725556	0.819944	0.0635694	0.0107222
66.5	0.0634444	0.853056	0.0521528	0.00479167
67	0.0631111	0.814014	0.0801944	0.005125
67.5	0.120042	0.666986	0.122806	0.0134028
68	0.172625	0.560667	0.171917	0.0173472
68.5	0.237139	0.450111	0.2155	0.0283056
69	0.239944	0.437389	0.220194	0.0150556
69.5	0.119569	0.587208	0.237806	0.0127778
70	0.0412361	0.695306	0.217444	0.0207778
70.5	0.00308333	0.736972	0.252486	0.00670833
71	0.0314167	0.531333	0.341056	0.0675833
71.5	0.00711111	0.410722	0.543181	0.0304306

## Sheet: F5B
Figure 5B
	Power spectrum
periods(hours)	locomotion	sleep	short rest	feeding
35.75	0.145671	0.678718	2.47808	1.00284
31.7778	3.52329	4.73402	4.2955	2.86713
28.6	15.6595	14.696	6.49723	6.97732
26	33.1756	26.7061	7.24357	12.3585
23.8333	41.0061	31.5108	6.46182	14.9692
22	33.2905	26.1061	5.03831	13.1967
20.4286	16.6794	14.7673	4.51053	8.18073
19.0667	3.26418	4.57146	4.32491	3.27896
17.875	0.709114	1.01316	3.20055	1.22196
16.8235	3.57312	2.28464	1.89771	1.38443
15.8889	3.75938	2.95885	1.62691	1.46542

## Sheet: F5C
Figure 5C
Time	Fraction of time in grooming
(hours)	wt	perS	perL	per0
0	0.07414	0.06563	0.1685	0.111222
0.5	0.10939	0.03047	0.135917	0.0631389
1	0.07533	0.05367	0.0930694	0.0379028
1.5	0.086	0.03379	0.0643472	0.0433333
2	0.01356	0.03654	0.0568056	0.057375
2.5	0.01558	0.04889	0.0632917	0.048375
3	0.03408	0.03282	0.0369028	0.0651528
3.5	0.03903	0.04991	0.0537361	0.0358194
4	0.05586	0.02607	0.0567083	0.00748611
4.5	0.02406	0.04394	0.0354167	0.0369028
5	0.02683	0.07768	0.0373889	0.0174583
5.5	0.05339	0.14615	0.0373194	0.0383611
6	0.01844	0.12597	0.0434306	0.0643889
6.5	0.03792	0.15868	0.0365	0.046625
7	0.05861	0.14595	0.0445972	0.0540278
7.5	0.06025	0.14364	0.0288611	0.0434861
8	0.04841	0.13798	0.0275139	0.0682083
8.5	0.05555	0.13561	0.029625	0.0712639
9	0.049	0.14328	0.0520972	0.0649167
9.5	0.08728	0.141	0.0364028	0.0995417
10	0.12281	0.14779	0.0343333	0.0791806
10.5	0.14147	0.14402	0.0512639	0.0652917
11	0.21656	0.12622	0.057625	0.0387639
11.5	0.16869	0.12228	0.0932083	0.0727639
12	0.05775	0.10021	0.150583	0.0863611
12.5	0.11531	0.01606	0.100375	0.0512639
13	0.07578	0.04624	0.1015	0.05875
13.5	0.04244	0.03559	0.115417	0.0516111
14	0.08545	0.02597	0.127125	0.0277917
14.5	0.04728	0.04075	0.144792	0.0430833
15	0.05008	0.04053	0.1395	0.0366111
15.5	0.00733	0.04378	0.152778	0.0535833
16	0.05558	0.03603	0.134917	0.04475
16.5	0.05622	0.04264	0.163361	0.0224583
17	0.06039	0.05114	0.149097	0.0439444
17.5	0.06472	0.0554	0.152875	0.0731111
18	0.07664	0.02855	0.116708	0.0584722
18.5	0.06756	0.04028	0.129944	0.0414861
19	0.0683	0.06614	0.0568333	0.0794861
19.5	0.06386	0.05285	0.0539722	0.0259444
20	0.00553	0.0886	0.0445833	0.0502361
20.5	0.01069	0.09495	0.0523611	0.111264
21	0.02717	0.09028	0.0211944	0.0633194
21.5	0.11111	0.09267	0.033	0.0607361
22	0.11778	0.10025	0.0384306	0.0683194
22.5	0.09431	0.09156	0.0631389	0.0590972
23	0.10253	0.09076	0.0354306	0.049625
23.5	0.11586	0.08728	0.0492361	0.0423056
24	0.108	0.05468	0.171542	0.142958
24.5	0.10131	0.05809	0.135056	0.105111
25	0.04325	0.04047	0.0923333	0.0356667
25.5	0.04225	0.04183	0.0498194	0.0397222
26	0.0725	0.04279	0.0524861	0.0266944
26.5	0.04922	0.01824	0.0357778	0.0111528
27	0.01716	0.03386	0.0488611	0.067125
27.5	0.02686	0.04033	0.0415417	0.0333194
28	0.03761	0.02382	0.0347778	0.0387083
28.5	0.05694	0.03219	0.0376528	0.028625
29	0.01139	0.05637	0.0592361	0.0579583
29.5	0.04542	0.07357	0.0389722	0.0569722
30	0.05014	0.16422	0.039875	0.0445278
30.5	0.04136	0.14453	0.0402361	0.0567222
31	0.03181	0.13588	0.0433056	0.0532639
31.5	0.04928	0.14103	0.0539306	0.045375
32	0.03403	0.14316	0.0297083	0.0839306
32.5	0.06228	0.12986	0.0362361	0.0857639
33	0.09045	0.14722	0.0524444	0.0806944
33.5	0.07897	0.15932	0.0543056	0.0437361
34	0.08311	0.15818	0.0437778	0.0840417
34.5	0.1485	0.161	0.0358194	0.1015
35	0.15517	0.14542	0.0499722	0.0885556
35.5	0.1765	0.11343	0.073375	0.083625
36	0.0925	0.0691	0.154569	0.0953194
36.5	0.07992	0.00611	0.0774861	0.0605278
37	0.05441	0.02218	0.0763333	0.028125
37.5	0.03456	0.01799	0.108056	0.0260278
38	0.04356	0.07017	0.127	0.0263472
38.5	0.06306	0.04969	0.121333	0.052625
39	0.00842	0.04305	0.135	0.0403056
39.5	0.04639	0.0383	0.140181	0.0282917
40	0.06514	0.05207	0.159986	0.0410694
40.5	0.01775	0.05114	0.135181	0.0509583
41	0.03661	0.0542	0.166681	0.0435139
41.5	0.02842	0.07568	0.121986	0.0164444
42	0.11208	0.06088	0.170097	0.0524167
42.5	0.02731	0.02381	0.149514	0.0760417
43	0.02508	0.06694	0.113028	0.0426389
43.5	0.07264	0.06308	0.115583	0.031875
44	0.06336	0.08776	0.0826528	0.0406667
44.5	0.06989	0.1035	0.0838333	0.0537778
45	0.04205	0.11406	0.060375	0.0441667
45.5	0.09403	0.12899	0.0564861	0.0784444
46	0.12606	0.06586	0.0379444	0.0508333
46.5	0.12131	0.09932	0.0419306	0.0422778
47	0.11575	0.07272	0.0529583	0.0712917
47.5	0.10575	0.08979	0.0353889	0.0690972
48	0.108	0.09519	0.150514	0.0479028
48.5	0.14575	0.04231	0.120028	0.0927917
49	0.11031	0.03801	0.128153	0.069875
49.5	0.09417	0.02772	0.125056	0.0930417
50	0.09003	0.03704	0.092375	0.0558333
50.5	0.08703	0.07046	0.0688611	0.0740972
51	0.00458	0.06624	0.104014	0.0713056
51.5	0.02769	0.04526	0.0674722	0.112417
52	0.02131	0.0392	0.0299167	0.0825
52.5	0.01219	0.08353	0.0386389	0.118806
53	0.10617	0.09161	0.0205833	0.0911528
53.5	0.04786	0.10602	0.012625	0.0775556
54	0.07397	0.10633	0.0492083	0.0915556
54.5	0.04464	0.0972	0.0320694	0.127667
55	0.04911	0.10863	0.027625	0.0815833
55.5	0.104	0.10453	0.0213611	0.0746111
56	0.10594	0.09604	0.0424306	0.0749722
56.5	0.10925	0.12026	0.0550139	0.0650278
57	0.14975	0.10158	0.0709583	0.111542
57.5	0.11475	0.09064	0.0836528	0.0925139
58	0.11742	0.07465	0.0755972	0.0972361
58.5	0.1415	0.06785	0.0803472	0.114639
59	0.13811	0.04678	0.104139	0.0842083
59.5	0.10561	0.0275	0.137306	0.0285278
60	0.12081	0.02304	0.0855278	0.0811389
60.5	0.12728	0.03342	0.0922222	0.0872778
61	0.11506	0.01576	0.0744861	0.0976806
61.5	0.10547	0.04799	0.0526389	0.0516944
62	0.1153	0.02604	0.0531528	0.0333611
62.5	0.07697	0.07369	0.0736667	0.0905556
63	0.09483	0.04439	0.0464861	0.0975
63.5	0.05197	0.09378	0.0789722	0.110694
64	0.07342	0.10454	0.0501806	0.10125
64.5	0.05903	0.09607	0.0406389	0.110181
65	0.05467	0.10732	0.0689306	0.0875417
65.5	0.04761	0.10858	0.0524583	0.104319
66	0.0295	0.1261	0.0774861	0.0522083
66.5	0.02442	0.10821	0.103861	0.0884583
67	0.00106	0.03936	0.117264	0.0904444
67.5	0.06928	0.06803	0.101153	0.111278
68	0.029	0.07239	0.108806	0.0654028
68.5	0.05389	0.06164	0.138722	0.0666389
69	0.02283	0.03558	0.172278	0.085125
69.5	0.06531	0.0599	0.146792	0.0911111
70	0.09069	0.02954	0.14275	0.0868194
70.5	0.07103	0.04207	0.148986	0.0615417
71	0.12436	0.08213	0.143903	0.0732222
71.5	0.08778	0.04396	0.158292	0.0459444
72	0.08195	0.09361	0.145958	0.0801389
72.5	0.12019	0.09793	0.180347	0.0744167
73	0.07333	0.09408	0.170639	0.0718194
73.5	0.02375	0.09836	0.176681	0.0835556
74	0.06345	0.1155	0.159736	0.0826389
74.5	0.000583333	0.09813	0.169153	0.100264
75	0.05308	0.12517	0.179208	0.111125
75.5	0.08011	0.13271	0.204514	0.066375
76	0.02803	0.11659	0.156042	0.0591944
76.5	0.000443333	0.09809	0.142083	0.103889
77	0.05467	0.0877	0.151125	0.06125
77.5	0.08111	0.09044	0.123153	0.0571806
78	0.02889	0.09636	0.125903	0.0942639
78.5	0.06119	0.06284	0.0923611	0.0595833
79	0.04564	0.04733	0.097125	0.0936806
79.5	0.13606	0.05463	0.0876389	0.130792
80	0.10461	0.03874	0.0477917	0.100292
80.5	0.08992	0.02599	0.0417083	0.112389
81	0.09144	0.03724	0.0300278	0.0918056
81.5	0.12719	0.0229	0.0257778	0.0788056
82	0.11353	0.06597	0.0302917	0.109583
82.5	0.13156	0.04446	0.0387917	0.0825694
83	0.119	0.10156	0.05475	0.0800278
83.5	0.13769	0.09957	0.0220278	0.0769306
84	0.11567	0.11138	0.0360556	0.0703611
84.5	0.10714	0.12789	0.0285417	0.0885833
85	0.11083	0.09271	0.0585417	0.117042
85.5	0.12867	0.11349	0.0610278	0.147528
86	0.17383	0.07915	0.0778889	0.0995972
86.5	0.10072	0.04209	0.0688472	0.0598194
87	0.07897	0.02321	0.0806528	0.0621528
87.5	0.07572	0.02242	0.061125	0.0998333
88	0.08497	0.03393	0.081375	0.0689583
88.5	0.08061	0.0566	0.0584167	0.0590556
89	0.0495	0.0304	0.0863889	0.104806
89.5	0.06658	0.04103	0.0464444	0.0649722
90	0.04664	0.06796	0.0617639	0.0802083
90.5	0.11783	0.06782	0.0539028	0.0274583
91	0.12245	0.0889	0.0542361	0.0454861
91.5	0.05736	0.1209	0.0804306	0.0967917
92	0.00775	0.10353	0.0390556	0.0741528
92.5	0.00842	0.12593	0.0634861	0.0245972
93	0.000556667	0.11863	0.0735417	0.0250139
93.5	0.019	0.12446	0.0589722	0.0475139
94	0.05867	0.12165	0.107278	0.0834583
94.5	0.07034	0.13495	0.104292	0.111889
95	0.07347	0.15362	0.0664444	0.0901944
95.5	0.11683	0.14527	0.0872083	0.0364722
96	0.09397	0.14783	0.0688611	0.0922917
96.5	0.0547	0.08181	0.122056	0.064125
97	0.03084	0.06392	0.117264	0.119014
97.5	0.0035	0.05996	0.113	0.08025
98	0.10653	0.06344	0.144542	0.095625
98.5	0.08314	0.0789	0.143542	0.0837917
99	0.02436	0.04004	0.142806	0.0618611
99.5	0.01867	0.02135	0.153583	0.0600556
100	0.06075	0.03221	0.157542	0.0738333
100.5	0.03164	0.01868	0.150292	0.108722
101	0.03381	0.04846	0.150458	0.046375
101.5	0.03872	0.02302	0.159597	0.0770278
102	0.05722	0.05451	0.1345	0.106569
102.5	0.04042	0.07428	0.180444	0.0722083
103	0.08733	0.09506	0.153611	0.0964722
103.5	0.10414	0.11867	0.144542	0.0746389
104	0.09036	0.10721	0.157889	0.0626111
104.5	0.11586	0.11457	0.134806	0.0631944
105	0.113	0.06239	0.148222	0.108097
105.5	0.13481	0.07102	0.128208	0.0554861
106	0.15595	0.02499	0.0815	0.067375
106.5	0.13514	0.03576	0.0859722	0.111
107	0.13644	0.04614	0.0736667	0.0553472
107.5	0.13544	0.0151	0.0639583	0.0840139
108	0.11444	0.04789	0.06225	0.0385833
108.5	0.13731	0.06975	0.0523889	0.0744028
109	0.14128	0.04471	0.0408194	0.0785694
109.5	0.15617	0.05446	0.031	0.0443611
110	0.14925	0.07828	0.038625	0.0427639
110.5	0.16186	0.11118	0.0390833	0.0863194
111	0.09328	0.09682	0.0601111	0.0882083
111.5	0.08353	0.11297	0.0381389	0.0982639
112	0.03614	0.11095	0.0239861	0.0972778
112.5	0.0232	0.11862	0.0440139	0.0822639
113	0.03639	0.11884	0.0530833	0.076125
113.5	0.04622	0.14275	0.0513056	0.132319
114	0.08756	0.14539	0.0980139	0.104444
114.5	0.08722	0.08067	0.0754028	0.0934306
115	0.03225	0.07908	0.0764861	0.108514
115.5	0.05331	0.07479	0.068125	0.0871944
116	0.02778	0.06884	0.0682361	0.0587083
116.5	0.02764	0.03995	0.08975	0.069
117	0.02731	0.0741	0.0765972	0.0670278
117.5	0.00889	0.02654	0.0796944	0.1045
118	0.06197	0.02535	0.0330833	0.0677917
118.5	0.09008	0.01047	0.040875	0.0944583
119	0.07364	0.04204	0.0712639	0.078375
119.5	0.07253	0.05734	0.0790833	0.0428333
120	0.09953	0.05369	0.0668056	0.0431806
120.5	0.01972	0.0559	0.0375694	0.113722
121	0.01417	0.05775	0.112125	0.0924722
121.5	0.00236	0.09478	0.0887917	0.0711944
122	0.02986	0.1196	0.072375	0.136556
122.5	0.02886	0.12039	0.0974444	0.129764
123	0.0667	0.12503	0.0676111	0.114722
123.5	0.00244	0.10586	0.0695278	0.0745694
124	0.00753	0.05347	0.0818333	0.0682222
124.5	0.04967	0.02954	0.121069	0.0830278
125	0.00325	0.04521	0.0785694	0.117792
125.5	0.04414	0.03411	0.0931944	0.109583
126	0.08956	0.04285	0.143125	0.0793611
126.5	0.04264	0.05406	0.117569	0.103236
127	0.0548	0.06263	0.180319	0.102986
127.5	0.12225	0.04196	0.149208	0.0509583
128	0.08905	0.05613	0.145125	0.0584722
128.5	0.12764	0.13033	0.154	0.0855
129	0.11542	0.09102	0.171	0.100861
129.5	0.11481	0.10135	0.155722	0.0601389
130	0.12953	0.09816	0.134931	0.103083
130.5	0.13725	0.11675	0.174722	0.114514
131	0.13569	0.11843	0.165417	0.101125
131.5	0.12253	0.12414	0.134278	0.0918333
132	0.14869	0.11518	0.154111	0.0762083
132.5	0.15097	0.13104	0.170611	0.0915
133	0.12144	0.14376	0.12625	0.0679306
133.5	0.12992	0.14572	0.169819	0.0879861
134	0.13125	0.11296	0.117556	0.0938056
134.5	0.14886	0.05769	0.126583	0.105458
135	0.12122	0.05412	0.102431	0.0544861
135.5	0.05931	0.06954	0.0905417	0.0599028
136	0.03631	0.06621	0.09025	0.0859167
136.5	0.05958	0.05164	0.0631528	0.0781528
137	0.02403	0.065	0.0697361	0.074875
137.5	0.0675	0.06378	0.0699167	0.0815972
138	0.05686	0.04824	0.0525972	0.067625
138.5	0.03311	0.07754	0.0512917	0.118264
139	0.07547	0.04876	0.0512083	0.141097
139.5	0.07536	0.04639	0.0614444	0.106639
140	0.02116	0.06393	0.061875	0.0505556
140.5	0.00717	0.0786	0.0301528	0.0754167
141	0.04939	0.11571	0.0259167	0.0960694
141.5	0.06936	0.09758	0.0584583	0.0621944
142	0.03289	0.10481	0.0721389	0.0618056
142.5	0.0772	0.08692	0.078625	0.0601389
143	0.11856	0.07712	0.0659722	0.0694583
143.5	0.10244	0.09031	0.0531667	0.0962083

## Sheet: F5D
Figure 5D
	wt			perS			perL			per0
Period(hours)	fly#1	fly#2	fly#3	fly#4	fly#5	fly#6	fly#7	fly#8	fly#9	fly#10	fly#11	fly#12	p=0.01	p=0.05
35.75	0.15193	0.74042	0.71504	2.38367	1.09014	0.51942	13.8384	8.7189	7.8651	0.33176	0.5374	1.58197	9.57	7.94
31.7778	0.65009	1.24313	3.99425	3.20226	1.1418	0.8883	21.4419	13.2843	14.032	0.64515	0.42163	1.63721	9.57	7.94
28.6	5.51248	9.29914	10.2441	2.249	0.90888	0.46835	24.232	15.3517	17.9781	0.79404	0.15499	1.84202	9.57	7.94
26	14.513	21.017	16.3632	1.18791	0.13001	0.00396	18.975	12.5065	15.8673	0.63967	0.73612	2.2958	9.57	7.94
23.8333	18.7564	27.9099	19.5144	3.23542	0.79746	1.36912	9.69747	7.11623	8.50668	0.31205	2.29529	3.07552	9.57	7.94
22	15.1191	22.7028	16.8332	9.11677	4.76569	5.96966	3.33691	3.37401	2.62343	0.04133	3.46591	3.51577	9.57	7.94
20.4286	7.38869	10.4339	9.25035	13.7393	10.0822	11.076	0.55571	1.43589	0.20109	0.09278	3.18165	3.13311	9.57	7.94
19.0667	1.03742	2.07971	3.02782	13.7404	12.134	12.8547	0.03443	0.56611	0.2059	0.43859	2.04988	2.74268	9.57	7.94
17.875	0.3397	0.32205	0.45795	9.3	9.30129	9.75752	0.41733	0.25034	0.70212	0.84329	1.69324	2.78945	9.57	7.94
16.8235	2.11863	1.12705	0.5239	3.69478	4.04617	4.03519	1.31029	0.55822	0.85356	1.09981	2.04598	3.07486	9.57	7.94
15.8889	2.48596	0.56093	0.92501	0.71476	0.58317	0.80659	2.62223	1.72675	1.64179	1.16309	2.38786	3.14478	9.57	7.94

## Sheet: F5E
Figure 5E
Spectral power at circadian peaks
wt	perS	perL	per0	cyc01	clkjrk	p=0.05
18.9617	13.7404	24.232	1.16309	1.71652	6.86947	7.54
18.7564	12.134	32.3159	3.46591	1.63031	4.00807	7.54
27.9099	12.8547	15.3517	5.42068	2.78023	11.6354	7.54
19.5144	10.4381	17.9781	7.21087	0.50387	1.17482	7.54
19.9205	14.5262	19.0346	3.51577	2.45032	0.78324	7.54
19.7308	15.1044	20.5651	10.9512	0.90402	2.99538	7.54
24.531	13.2879	27.4649	3.76849	5.7755	0.80906	7.54
15.011	13.4174	21.4439	4.50335	2.04094	0.72149	7.54
16.3372	13.1465	8.98899	2.49564	4.01655	1.20691	7.54
15.9929	12.6405	15.8262	3.22258	1.27332	0.39417	7.54
26.5598	13.599	19.0284	5.16624	0.65892	0.50682	7.54
18.2531	10.204	28.4737	6.35311	2.15099		7.54
23.2681	10.7846	23.3051	2.343	3.0235		7.54
23.9258	11.4819	20.2787	5.02129			7.54
12.8458	11.6852	23.772	5.86087			7.54
16.4618	4.4142	24.128	3.12314			7.54
25.9274	14.6886	31.5215	0.206187			7.54
14.5157	12.7797	8.36636	2.66857			7.54
26.7435	14.3121	12.7652	1.62277			7.54
22.2577	13.3547	26.5013	2.56249			7.54
34.1972		10.3987				7.54
15.5242		28.0427				7.54
15.3298		10.0517				7.54
21.7187		20.2797				7.54
18.4467		19.1213				7.54
19.5563		18.8227				7.54
16.1023		17.75				7.54
17.2817		25.1738				7.54
16.3542		25.2846				7.54
