# Supplementary material for: Automated analysis of long-term grooming behavior in Drosophila using a k-nearest neighbors classifier
Source: eLife. 2018 Feb 27;7:e34497. doi: 10.7554/eLife.34497 (PMC5860874; doi:10.7554/eLife.34497)
Supplement: Figure 5—source data 2. [file elife-34497-fig5-data2.xlsx]

## Sheet: Fig 5-S1A
Fig 5
Control
Period(hours)	fly#1	fly#2	fly#3	fly#4	fly#5	fly#6	fly#7	fly#8	fly#9	fly#10	fly#11	fly#12	fly#13	fly#14	fly#15	fly#16	fly#17	fly#18	fly#19	fly#20	fly#21	fly#22	fly#23	fly#24	fly#25	fly#26	fly#27	fly#28	fly#29
35.75	0.440116	0.151929	0.740421	0.715042	0.252578	0.426505	0.171736	0.422408	1.02833	0.449275	0.75322	0.244804	0.220861	1.20474	0.782844	0.475424	0.926254	1.4412	0.993028	2.03522	0.47969	0.805269	1.07443	0.901138	3.3493	0.0259974	0.299485	0.32861	0.0179392
31.7778	3.00124	0.650093	1.24313	3.99425	1.20011	0.723211	3.54414	1.27954	4.74723	1.21999	5.22387	0.687658	0.893429	4.78992	1.83497	1.74792	1.20779	2.01127	2.96375	0.331664	0.867724	0.0286788	1.04782	2.94398	8.2689	0.851271	2.06104	0.259687	0.484679
28.6	9.4392	5.51248	9.29914	10.2442	7.39489	6.36981	12.2703	4.99064	10.7164	5.03811	15.466	5.31352	6.58257	12.6327	4.63776	7.11376	8.77494	5.71618	8.84808	5.97855	8.49839	2.25464	4.46766	8.84989	14.0385	5.45564	7.02613	2.71397	3.44919
26	17.361	14.513	21.017	16.3632	15.7988	15.5532	22.3967	11.3687	16.2127	10.8484	26.4063	13.3575	17.3991	21.8728	9.11722	13.611	19.3789	12.3491	18.9994	15.9753	23.8231	9.39565	10.6358	17.4228	18.8481	13.6282	12.6847	9.13472	9.75909
23.8333	18.9617	18.7564	27.9099	19.5144	19.9205	19.7308	24.531	15.011	16.3372	15.9929	26.5598	18.2531	23.2681	23.9257	12.8458	16.4618	25.9274	14.5157	26.7435	22.2577	34.1972	15.5242	15.3298	21.7187	18.4467	19.5563	16.1023	15.5396	15.2688
22	13.5324	15.1191	22.7028	16.8332	15.9797	14.4361	18.674	12.7455	10.3147	15.3673	18.3219	16.0939	19.1462	17.0615	12.0885	12.0939	21.193	9.92499	25.4209	20.0503	31.4773	15.4681	15.5728	19.4729	13.6859	18.1529	13.3873	17.2817	16.3542
20.4286	5.5089	7.38869	10.4339	9.25035	9.08594	5.22564	10.2914	7.15421	4.49892	8.47755	8.65704	9.35529	9.53856	7.19473	7.72504	4.46383	9.28315	3.27294	16.0831	12.463	18.0759	9.84853	11.3851	12.5061	7.59798	9.96102	6.02104	13.3951	12.4616
19.0667	0.397112	1.03742	2.07971	3.02782	4.53801	0.327451	3.24223	2.11635	2.58671	2.20491	2.13902	2.96636	1.55671	0.87199	3.27156	0.288044	1.4165	0.213702	4.83457	4.89425	4.15168	2.55518	5.33977	3.96327	2.0408	1.96539	0.928812	5.50762	5.85701
17.875	0.888862	0.339699	0.322051	0.457948	3.5415	2.08586	0.361002	0.35863	3.95759	0.0509969	0.663613	0.734869	0.138116	0.305772	1.04848	0.556199	0.247186	2.26162	0.133169	0.836226	0.067553	0.0113312	1.25534	0.0949056	0.496325	0.340317	0.266936	0.535518	2.29319
16.8235	3.287	2.11863	1.12705	0.523903	3.35609	4.40373	0.252562	0.403462	3.94652	1.34546	0.784272	1.3851	1.21882	1.38371	0.99655	1.78026	1.95769	4.06229	2.15151	0.356794	3.1302	1.6244	0.97708	1.27133	2.13481	3.26819	1.98316	0.887289	2.58769
15.8889	3.89197	2.48596	0.560927	0.925009	1.45389	2.76249	0.639775	0.149812	1.35377	2.48622	0.359837	1.40842	0.760028	0.906435	1.36199	1.20077	1.89233	2.69539	4.47096	1.21066	4.84848	2.75732	2.08636	2.79731	3.42641	4.57311	2.29637	2.19826	3.29786
per0
Period(hours)	fly#1	fly#2	fly#3	fly#4	fly#5	fly#6	fly#7	fly#8	fly#9	fly#10	fly#11	fly#12	fly#13	fly#14	fly#15	fly#16	fly#17	fly#18	fly#19	fly#20
35.75	1.78703	1.29428	0.031631	0.168742	0.86677	0.161423	0.331759	0.537397	1.77948	2.89085	1.58197	10.9512	3.76849	4.50335	1.7615	2.85726	1.26267	1.36201	1.83228	4.80461
31.7778	0.762794	1.1523	0.0065386	0.222562	0.395408	0.220741	0.645147	0.421634	0.159204	5.72738	1.63721	5.13666	2.50874	2.90971	2.49564	3.22258	2.34527	3.03946	2.343	5.02129
28.6	0.135095	1.82692	0.0109305	1.35932	0.684942	0.897619	0.794045	0.154994	1.16281	7.21087	1.84202	1.51588	0.690017	1.51084	2.17231	2.31507	3.8232	5.46142	1.77262	4.80013
26	0.215946	2.64323	0.0792503	2.5358	0.891492	1.29979	0.639673	0.736118	3.74255	5.88026	2.2958	2.18633	0.291699	1.22255	0.899815	1.32429	4.75243	6.35311	0.670538	2.99443
23.8333	0.625936	3.12314	0.168196	2.66857	0.55617	1.14983	0.312049	2.29529	5.42068	3.27573	3.07552	3.7592	0.875627	1.65035	0.252696	0.766604	5.16624	5.52152	0.180791	1.15353
22	1.13738	2.63903	0.206187	2.06769	0.308963	0.993332	0.0413342	3.46591	4.41703	0.883737	3.51577	3.87942	0.967708	1.47443	0.817068	0.392674	4.32809	3.37632	0.325999	0.830247
20.4286	2.03073	1.56987	0.162105	1.69433	0.544403	1.73879	0.0927776	3.18165	2.45054	0.0972961	3.13311	2.95506	0.54419	0.471177	1.62326	0.217734	2.61475	1.31168	0.389712	1.81027
19.0667	3.78273	0.840934	0.0542503	1.56145	0.763075	2.56249	0.438587	2.04988	3.22135	0.349195	2.74268	2.52652	0.383473	0.0935929	1.22574	0.198939	1.34623	0.488092	0.277905	2.44556
17.875	5.22438	0.430139	0.000638687	1.4285	0.37692	1.85336	0.843293	1.69324	6.51947	0.735052	2.78945	1.77719	0.630338	0.928106	0.20627	0.247835	0.731163	0.286047	0.357584	1.82689
16.8235	5.86087	0.20426	0.0733462	1.07169	0.252485	0.351384	1.09981	2.04598	9.66767	1.12331	3.07486	0.757894	0.495376	2.08856	0.297453	0.134429	0.651026	0.260405	0.593641	1.18167
15.8889	5.02981	0.0891638	0.186453	0.527455	1.62277	0.454081	1.16309	2.38786	10.41	1.75151	3.14478	0.104917	0.220771	2.33082	1.77541	0.00277323	0.950653	0.211972	0.613667	1.01825
perS
Period(hours)	fly#1	fly#2	fly#3	fly#4	fly#5	fly#6	fly#7	fly#8	fly#9	fly#10	fly#11	fly#12	fly#13	fly#14	fly#15	fly#16	fly#17	fly#18	fly#19	fly#20
35.75	2.38367	1.09014	0.519423	1.52659	0.0450522	0.151107	1.24023	0.517148	0.267715	0.466971	0.76118	0.478102	0.296038	0.894709	0.914269	0.276844	0.198264	1.1766	0.399954	1.07469
31.7778	3.20226	1.1418	0.888305	2.17142	0.159093	0.484279	4.81714	1.45801	0.781206	1.38523	0.403577	0.51999	0.46176	0.789698	1.33117	0.616589	0.030305	1.31343	1.13995	0.600455
28.6	2.249	0.908881	0.468347	1.61247	0.163696	0.6259	6.3003	1.3547	0.644547	1.27049	0.239517	0.368152	0.514234	0.208264	0.827086	0.588139	0.183655	0.58495	1.10134	0.230921
26	1.18791	0.130006	0.00396299	0.313947	0.927049	0.19551	3.76286	0.224037	0.0801444	0.585389	1.75505	0.0844106	0.0965165	0.278144	1.13016	0.203302	1.19899	0.550414	0.483597	0.984507
23.8333	3.23542	0.797456	1.36912	0.709616	4.36542	0.745301	0.508995	0.62225	1.20128	1.56506	5.41489	0.249054	0.426624	2.59996	3.99922	0.294165	3.45892	3.17311	1.19807	3.96954
22	9.11677	4.76569	5.96966	3.9388	10.5407	4.59943	2.09269	4.80818	5.64708	5.59844	9.99987	2.02331	3.11958	6.76498	8.57792	1.44163	6.93653	8.16688	4.7157	8.59416
20.4286	13.7393	10.0822	11.076	8.50058	14.5262	10.7359	8.66536	10.6375	11.1245	10.7558	13.599	6.05927	7.7208	10.7268	11.6852	3.3344	11.4946	12.7346	10.488	12.9341
19.0667	13.7404	12.134	12.8547	10.4381	13.6729	15.1044	13.2879	13.4174	13.1465	12.6405	12.8434	10.204	10.7846	11.4819	10.1095	4.4142	14.6886	12.7797	14.3121	13.3547
17.875	9.3	9.30129	9.75752	7.57911	9.18545	14.3035	11.9887	10.3791	10.0893	9.46902	7.44961	10.2163	8.75905	7.98243	5.59001	3.39304	12.9195	7.83306	12.0667	8.81329
16.8235	3.69478	4.04617	4.03519	3.15301	3.8606	8.45943	5.61965	4.49732	4.60509	4.49852	2.30041	6.16979	4.15378	3.48643	1.84308	1.53061	7.94588	2.73582	6.77678	3.71266
15.8889	0.714758	0.583174	0.806586	0.399484	2.35657	2.3191	0.806177	0.625542	0.897714	1.14915	0.0937529	1.48637	0.832651	0.664929	0.402486	0.247088	2.73566	0.549973	2.3406	0.693959
perL
Period(hours)	fly#1	fly#2	fly#3	fly#4	fly#5	fly#6	fly#7	fly#8	fly#9	fly#10	fly#11	fly#12	fly#13	fly#14	fly#15	fly#16	fly#17	fly#18	fly#19	fly#20	fly#21	fly#22	fly#23	fly#24	fly#25	fly#26	fly#27	fly#28	fly#29
35.75	13.8384	10.4015	8.7189	7.8651	9.50755	13.9659	11.6643	8.3019	0.519892	4.19958	12.8446	9.57458	7.22726	5.86167	6.82467	10.8637	23.1025	8.02917	7.16571	9.00458	6.94681	18.6885	6.78314	9.49471	11.0601	9.53149	8.66289	14.1698	16.7176
31.7778	21.4419	23.3681	13.2843	14.0321	15.4197	19.9809	20.7742	17.421	3.13914	10.8523	19.0284	21.628	18.1031	13.7544	16.4441	19.5057	31.5215	8.36636	11.2302	18.9433	10.0643	25.5646	9.08904	15.4985	18.0395	16.526	14.5443	22.7496	24.9912
28.6	24.232	32.3159	15.3517	17.9781	19.0346	20.5651	27.4649	21.4439	6.87819	15.8262	18.3765	28.4737	23.3051	20.2787	23.772	24.128	30.8964	7.45456	12.7652	26.5013	10.3987	28.0427	10.0517	20.2797	19.1213	18.8227	17.75	25.1738	25.2846
26	18.975	29.7813	12.5065	15.8673	16.3625	14.6064	25.686	18.0194	8.98899	14.8259	11.5514	24.3287	19.064	17.7858	22.8001	19.5292	19.1628	4.84829	9.68037	22.6877	6.25858	21.3156	8.14594	18.0902	11.8117	13.4632	13.705	16.7351	15.2286
23.8333	9.69747	17.9803	7.11623	8.50668	9.13098	7.22392	15.3417	9.59622	8.00271	8.7484	4.19267	13.1323	9.49869	8.96974	14.6259	9.40333	6.07766	2.13224	4.7127	10.8259	1.58012	10.1025	4.61508	9.32219	3.2163	5.12223	5.28561	5.09916	3.99752
22	3.33691	5.78411	3.37401	2.62343	3.84267	3.69344	5.71843	2.20092	3.71914	1.86797	0.582454	3.24557	1.41278	1.27163	6.05386	2.92962	0.966032	1.19206	1.77097	3.24542	0.386432	3.71826	2.48802	2.52027	0.685579	0.89759	0.530035	0.45693	0.244011
20.4286	0.555709	0.446396	1.43589	0.201093	1.10971	2.32761	1.24013	0.0418101	0.562001	0.204597	1.00833	0.766107	0.487285	0.449605	1.54692	0.777195	0.670643	1.18789	0.511241	2.18619	1.14389	1.38848	1.26347	0.201159	2.27118	0.506903	0.42959	1.01685	1.02284
19.0667	0.034428	0.814313	0.566112	0.205905	0.174692	1.26737	0.960603	0.919247	1.02756	2.35517	1.69897	2.59198	2.92087	2.77138	1.16261	0.135675	0.507891	0.94526	0.545959	2.21074	1.10031	0.530067	0.935563	1.13776	3.08866	1.01058	2.57741	1.75202	1.48339
17.875	0.417327	1.35636	0.250338	0.702119	0.972379	0.234041	0.837064	1.27873	2.90584	3.15736	1.43707	2.27353	3.20965	2.9368	1.40735	0.199339	0.461694	0.403059	1.92037	0.746682	0.180262	0.61067	2.03984	3.04545	1.33022	0.968302	4.8116	0.774957	0.888623
16.8235	1.31029	0.827218	0.558224	0.853555	4.723	0.362218	0.0791854	1.31061	2.97073	1.31082	2.65732	0.291651	1.81692	1.59643	1.54945	2.80137	3.62325	0.747358	5.06302	0.879737	0.951102	3.18195	5.80316	5.76611	0.990415	0.823372	8.08226	1.04158	2.28461
15.8889	2.62223	1.24446	1.72675	1.64179	10.4408	3.00999	1.56659	3.93486	1.27647	0.611119	7.14929	1.89328	2.89621	3.99472	2.83287	7.92437	9.08216	2.66298	8.37271	5.37769	4.28055	7.38918	10.4616	9.03157	4.89754	1.16028	12.019	4.12182	5.84109

## Sheet: Fig 5-S1B
Fig 5-S1B
Periods(hours)	# of wt flies		Periods(hours)	# of perS flies		Periods(hours)	# of perL flies
22	3		17.9	1		26	1
23.8	25		19.1	15		28.6	25
26	1		20.4	3		31.8	3

## Sheet: Fig 5-S1C
Fig 5-S1C
30minBin
Period(hours)	fly#1	fly#2	fly#3	fly#4	fly#5	fly#6	fly#7	fly#8	fly#9	fly#10	fly#11	fly#12	fly#13	fly#14	fly#15	fly#16	fly#17	fly#18	fly#19	fly#20	fly#21	fly#22	fly#23	fly#24	fly#25	fly#26	fly#27	fly#28	fly#29
35.75	0.440116	0.151929	0.740421	0.715042	0.252578	0.426505	0.171736	0.422408	1.02833	0.449275	0.75322	0.244804	0.220861	1.20474	0.782844	0.475424	0.926254	1.4412	0.993028	2.03522	0.47969	0.805269	1.07443	0.901138	3.3493	0.0259974	0.299485	0.32861	0.0179392
31.7778	3.00124	0.650093	1.24313	3.99425	1.20011	0.723211	3.54414	1.27954	4.74723	1.21999	5.22387	0.687658	0.893429	4.78992	1.83497	1.74792	1.20779	2.01127	2.96375	0.331664	0.867724	0.0286788	1.04782	2.94398	8.2689	0.851271	2.06104	0.259687	0.484679
28.6	9.4392	5.51248	9.29914	10.2442	7.39489	6.36981	12.2703	4.99064	10.7164	5.03811	15.466	5.31352	6.58257	12.6327	4.63776	7.11376	8.77494	5.71618	8.84808	5.97855	8.49839	2.25464	4.46766	8.84989	14.0385	5.45564	7.02613	2.71397	3.44919
26	17.361	14.513	21.017	16.3632	15.7988	15.5532	22.3967	11.3687	16.2127	10.8484	26.4063	13.3575	17.3991	21.8728	9.11722	13.611	19.3789	12.3491	18.9994	15.9753	23.8231	9.39565	10.6358	17.4228	18.8481	13.6282	12.6847	9.13472	9.75909
23.8333	18.9617	18.7564	27.9099	19.5144	19.9205	19.7308	24.531	15.011	16.3372	15.9929	26.5598	18.2531	23.2681	23.9257	12.8458	16.4618	25.9274	14.5157	26.7435	22.2577	34.1972	15.5242	15.3298	21.7187	18.4467	19.5563	16.1023	15.5396	15.2688
22	13.5324	15.1191	22.7028	16.8332	15.9797	14.4361	18.674	12.7455	10.3147	15.3673	18.3219	16.0939	19.1462	17.0615	12.0885	12.0939	21.193	9.92499	25.4209	20.0503	31.4773	15.4681	15.5728	19.4729	13.6859	18.1529	13.3873	17.2817	16.3542
20.4286	5.5089	7.38869	10.4339	9.25035	9.08594	5.22564	10.2914	7.15421	4.49892	8.47755	8.65704	9.35529	9.53856	7.19473	7.72504	4.46383	9.28315	3.27294	16.0831	12.463	18.0759	9.84853	11.3851	12.5061	7.59798	9.96102	6.02104	13.3951	12.4616
19.0667	0.397112	1.03742	2.07971	3.02782	4.53801	0.327451	3.24223	2.11635	2.58671	2.20491	2.13902	2.96636	1.55671	0.87199	3.27156	0.288044	1.4165	0.213702	4.83457	4.89425	4.15168	2.55518	5.33977	3.96327	2.0408	1.96539	0.928812	5.50762	5.85701
17.875	0.888862	0.339699	0.322051	0.457948	3.5415	2.08586	0.361002	0.35863	3.95759	0.0509969	0.663613	0.734869	0.138116	0.305772	1.04848	0.556199	0.247186	2.26162	0.133169	0.836226	0.067553	0.0113312	1.25534	0.0949056	0.496325	0.340317	0.266936	0.535518	2.29319
16.8235	3.287	2.11863	1.12705	0.523903	3.35609	4.40373	0.252562	0.403462	3.94652	1.34546	0.784272	1.3851	1.21882	1.38371	0.99655	1.78026	1.95769	4.06229	2.15151	0.356794	3.1302	1.6244	0.97708	1.27133	2.13481	3.26819	1.98316	0.887289	2.58769
15.8889	3.89197	2.48596	0.560927	0.925009	1.45389	2.76249	0.639775	0.149812	1.35377	2.48622	0.359837	1.40842	0.760028	0.906435	1.36199	1.20077	1.89233	2.69539	4.47096	1.21066	4.84848	2.75732	2.08636	2.79731	3.42641	4.57311	2.29637	2.19826	3.29786
5minBin
Period(hours)	fly#1	fly#2	fly#3	fly#4	fly#5	fly#6	fly#7	fly#8	fly#9	fly#10	fly#11	fly#12	fly#13	fly#14	fly#15	fly#16	fly#17	fly#18	fly#19	fly#20	fly#21	fly#22	fly#23	fly#24	fly#25	fly#26	fly#27	fly#28	fly#29
35.9583	0.615124	0.299711	1.63669	1.19303	0.479789	0.755116	0.177888	0.671269	1.68171	0.785855	1.0028	0.541724	0.332777	2.25128	1.50526	0.777684	2.35577	2.26777	1.92675	2.60835	0.891814	1.03244	1.54744	1.21364	4.28827	0.0639269	0.482268	0.603777	0.0235287
31.963	4.41183	0.757502	2.08557	6.8552	1.47741	0.901335	4.35655	1.90339	8.07862	1.87071	7.56091	1.08471	1.0642	8.77281	3.35154	2.39446	2.24628	3.05143	5.45222	0.271157	1.16197	0.0401895	1.33719	3.90802	10.7764	1.43556	3.06461	0.336657	0.420131
28.7667	14.2767	7.32016	17.4031	17.9379	10.1637	9.18152	15.8899	7.44683	18.8407	8.05271	23.137	9.3988	8.26656	23.5484	8.58588	10.3709	18.3776	8.63908	16.8323	6.26347	12.5811	2.25047	5.83609	12.0216	18.6443	9.83375	10.4875	3.96382	3.16359
26.1515	27.1011	20.4205	40.641	29.0353	22.4267	23.3842	30.0447	17.3588	29.0857	17.7583	40.8939	24.639	22.6747	41.7853	17.1379	20.3987	42.1668	19.1775	37.217	17.7699	37.014	10.1479	14.4663	24.43	25.5143	25.3718	18.9548	14.1897	9.26077
23.9722	30.5562	27.5808	55.5174	35.0786	29.0859	30.6732	33.9521	23.6547	30.211	26.7704	42.5244	34.7813	31.3543	47.1159	24.7567	25.3467	58.2196	23.3768	53.9911	25.7808	55.1054	17.468	21.4935	31.4351	25.5483	37.45	24.1666	25.1282	14.9353
22.1282	22.5329	23.0594	46.994	31.0896	24.062	23.3176	26.4868	20.7387	19.7252	26.7415	30.1502	31.6086	26.5428	34.7229	24.0174	19.3846	49.8021	16.5928	52.822	24.2001	52.402	17.8385	22.4777	28.9784	19.2242	36.0159	20.6047	28.7356	16.4023
20.5476	9.78939	11.9554	22.8746	17.8089	14.1331	9.07814	15.0682	12.1717	8.74597	15.6278	14.8616	19.1737	13.8614	15.4719	15.8966	7.65632	23.327	5.90775	34.8148	15.82	31.6071	11.7617	17.0335	19.4438	10.8856	21.054	9.73018	23.0899	12.9522
19.1778	0.950997	2.02433	5.14445	6.18225	7.23258	0.689775	5.08983	3.90201	4.62944	4.58836	3.92397	6.63247	2.61544	2.24477	7.09601	0.668225	4.21883	0.346164	11.5395	6.79405	8.2023	3.35257	8.43707	6.84272	3.10934	5.01387	1.75744	10.2275	6.43981
17.9792	1.09939	0.363012	0.522735	1.00588	5.35338	2.82231	0.648536	0.606126	6.8807	0.175488	0.996171	1.63821	0.101249	0.495222	2.30793	0.67189	0.303238	3.30394	0.396452	1.41825	0.0328021	0.00142135	2.08207	0.259864	0.576716	0.419744	0.283239	1.20892	2.44513
16.9216	4.99436	3.17039	1.97913	0.823868	5.08583	6.79763	0.301314	0.607	7.39599	1.84576	1.15923	2.68336	1.60191	2.86644	1.90531	2.68917	4.09333	6.67694	3.73573	0.431382	4.70949	1.712	1.34748	1.5183	2.62608	5.32729	2.60149	1.38012	2.45175
15.9815	6.38579	4.21768	1.22044	1.69477	2.41094	4.81912	0.808176	0.32335	2.89539	4.00101	0.584964	2.92347	1.20368	2.24081	2.67713	2.05857	4.64203	4.9323	9.02529	1.36555	8.30817	3.22071	3.17222	4.06954	4.53433	8.45939	3.29128	3.949	3.25786
1minBin
Period(hours)	fly#1	fly#2	fly#3	fly#4	fly#5	fly#6	fly#7	fly#8	fly#9	fly#10	fly#11	fly#12	fly#13	fly#14	fly#15	fly#16	fly#17	fly#18	fly#19	fly#20	fly#21	fly#22	fly#23	fly#24	fly#25	fly#26	fly#27	fly#28	fly#29
35.9917	1.13409	0.531294	3.15239	2.63042	0.994349	1.52378	0.331802	1.4342	3.33903	1.56249	1.48888	1.09268	0.509013	3.52042	3.34253	1.71813	4.77293	3.91046	3.53908	3.38291	1.47726	1.92921	2.79768	1.97492	6.20043	0.164378	0.881447	0.982617	0.0441001
31.9926	8.17655	1.2845	3.84591	15.2358	2.87522	1.69729	8.28382	4.00654	16.0795	3.64872	11.3274	2.05778	1.56775	13.6547	7.38595	5.12245	4.30761	5.21963	9.89396	0.327482	1.85664	0.0738767	2.37773	6.33754	15.6292	3.40334	5.57325	0.538324	0.744056
28.7933	26.5308	12.6308	32.6748	40.1105	20.124	17.7374	30.4068	15.6937	37.6207	15.8033	34.7916	18.1374	12.2294	36.7234	18.9615	22.3832	35.9925	14.705	30.6257	7.83903	20.3576	4.0706	10.3283	19.4962	27.0998	23.605	19.1748	6.29136	5.65731
26.1758	50.5585	35.4969	76.7018	65.1723	44.6665	45.5293	57.7684	36.7266	58.2093	34.9599	61.7734	47.8675	33.7324	65.395	37.9324	44.228	83.1242	32.7574	67.989	22.4747	60.2559	18.5956	25.7237	39.7222	37.1723	61.2418	34.7561	22.6272	16.6382
23.9944	57.2574	48.2408	105.219	78.9842	58.2441	60.1079	65.584	50.2906	60.7294	52.8555	64.5317	67.9427	46.9178	74.1078	55.0081	55.2195	115.328	40.1573	99.1369	32.8158	90.1222	32.2431	38.3529	51.2856	37.3409	90.814	44.4323	40.2384	26.9309
22.1487	42.4291	40.5558	89.578	70.341	48.4522	46.0232	51.3591	44.2866	39.8638	53.0792	45.9189	62.0511	39.9281	54.944	53.6147	42.5311	99.3074	28.6755	97.4693	30.9841	86.0563	33.1014	40.2274	47.4174	28.1641	87.7785	38.0755	46.156	29.6478
20.5667	18.6281	21.2424	43.9486	40.5566	28.5742	18.1562	29.375	26.1418	17.734	31.2575	22.7611	37.8779	21.0326	24.7449	35.6594	17.0066	46.9412	10.3424	64.6717	20.3729	52.2764	22.001	30.5929	31.9877	16.0146	51.7394	18.1137	37.2478	23.5007
19.1956	1.90333	3.73056	10.0394	14.2	14.6198	1.44005	10.0421	8.47303	9.27332	9.30734	6.06862	13.2433	4.07288	3.71893	16.0283	1.56183	8.6655	0.612427	21.7691	8.8218	13.8262	6.40902	15.2631	11.4244	4.63758	12.5835	3.32407	16.6644	11.7568
17.9958	1.9446	0.574705	0.981606	2.3366	10.726	5.37563	1.316	1.31102	13.7005	0.375036	1.51008	3.22185	0.12971	0.710487	5.22788	1.38972	0.550911	5.56498	0.80215	1.86613	0.0437964	0.00430418	3.8256	0.47248	0.84638	0.9502	0.498843	2.014	4.4374
16.9373	9.18565	5.42184	3.7086	1.81037	10.2494	13.2642	0.570512	1.28071	14.9178	3.55373	1.75722	5.17833	2.37102	4.42783	4.24243	5.82663	8.05769	11.4562	6.69689	0.549254	7.51382	3.06901	2.42985	2.38543	3.79767	12.677	4.76102	2.15985	4.37793
15.9963	11.896	7.3391	2.35686	3.80445	4.96341	9.58507	1.52659	0.705789	5.98769	7.90052	0.907944	5.73513	1.83641	3.54675	5.97979	4.57305	9.34011	8.60071	16.5836	1.73483	13.5329	5.9098	5.69475	6.58946	6.62645	20.5396	6.12092	6.3279	5.84773
RawData (5Hz)
Period(hours)	fly#1	fly#2	fly#3	fly#4	fly#5	fly#6	fly#7	fly#8	fly#9	fly#10	fly#11	fly#12	fly#13	fly#14	fly#15	fly#16	fly#17	fly#18	fly#19	fly#20	fly#21	fly#22	fly#23	fly#24	fly#25	fly#26	fly#27	fly#28	fly#29
36	160.733	77.0617	470.015	505.613	164.765	274.414	42.5596	235.417	531.936	255.882	195.974	192.214	68.3454	485.674	493.838	272.756	733.381	581.793	490.089	463.994	209.054	275.53	423.54	243.603	821.891	29.3303	117.993	117.845	6.18145
32	1161.48	183.804	565.785	2932.35	469.762	301.171	1069.49	654.895	2563.25	594.027	1494.76	357.294	208.248	1882.61	1089.53	807.116	653.701	774.82	1367.33	44.3177	259.551	10.5875	358.478	780.62	2073.11	594.679	744.829	63.8937	102.881
28.8	3772.96	1814.79	4831.37	7729.12	3301.66	3165.43	3932.28	2567.18	6003.34	2576.65	4595.82	3162.37	1628.9	5066.7	2798.08	3535.26	5488.04	2181.37	4234.26	1068.11	2858.13	576.928	1556.95	2402.21	3596.18	4137.89	2566.91	748.409	784.38
26.1818	7198.86	5109.83	11358.6	12567.9	7337.94	8139.36	7480	6014.94	9295.51	5705.45	8169.87	8359.05	4500.36	9030.35	5600.08	6993.34	12692.7	4864.74	9406.86	3068.32	8475.32	2643.42	3882.86	4898.76	4935.5	10750.8	4656.76	2697.23	2310.23
24	8163.13	6954.92	15600.3	15241.3	9580.04	10761.4	8501.97	8247.16	9709.23	8633.67	8545.16	11879.8	6268.77	10245	8128.42	8740.97	17629.7	5972.87	13730.6	4485.36	12693.2	4591.24	5794.95	6330.9	4962.15	15960.4	5957.64	4803.43	3743.82
22.1538	6056.9	5854.29	13301.8	13588.3	7979.54	8253.19	6664.23	7271.22	6382.12	8682.84	6086.64	10862.3	5341.83	7605.14	7931.46	6743.35	15204.9	4272.05	13513.9	4239.45	12134.7	4719.02	6083.87	5857.87	3745.64	15446.3	5112.4	5515.49	4125.21
20.5714	2665.82	3072.9	6539.87	7846.61	4710.36	3265.42	3816.32	4298.81	2841.89	5123.6	3021.8	6640.78	2819.83	3432.3	5281.5	2703.65	7203.75	1546.18	8980.43	2790.67	7384.85	3141.92	4632.28	3956.68	2132.92	9123.08	2437.43	4457.09	3273.91
19.2	275.357	543.456	1500.14	2752.9	2410.09	261.226	1307.9	1397.52	1481.76	1531.23	807.976	2328.09	549.554	519.393	2377.53	250.953	1337.22	91.9585	3034.16	1210.75	1962.04	919.377	2316.02	1417.8	620.221	2230.31	449.615	2000.19	1640.98
18	274.129	81.2171	145.519	454.432	1764.06	955.965	172.092	216.265	2185.43	62.5738	200.057	564.946	16.6162	96.5601	775.388	217.45	82.0894	823.094	113.683	257.002	6.03352	0.704253	582.09	59.7252	112.336	164.665	65.8966	243.613	619.027
16.9412	1306.33	779.37	548.875	347.742	1687.12	2372.57	73.5405	209.768	2386.68	576.604	232.528	903.591	315.758	610.525	626.269	921.113	1227.55	1702.6	921.029	74.7959	1053.77	435.153	365.571	292.279	502.582	2218.32	636.465	255.881	608.379
16	1697.15	1059.22	351.827	734.151	820.538	1722.17	197.368	116.533	963.418	1290.21	120.778	1004.58	246.377	491.725	883.485	726.652	1430.7	1283.15	2294.74	236.404	1908.08	842.492	858.672	812.812	880.347	3611.94	822.157	755.014	813.663
