# Supplementary material for: Automated analysis of long-term grooming behavior in Drosophila using a k-nearest neighbors classifier
Source: eLife. 2018 Feb 27;7:e34497. doi: 10.7554/eLife.34497 (PMC5860874; doi:10.7554/eLife.34497)
Supplement: Figure 5—source data 3. [file elife-34497-fig5-data3.xlsx]

## Sheet: Fig 5-S2A
Fig5S2A
Time	Fraction of time in locomotion
(hours)	wt	perS	perL	per0
0	0.94261	0.60406	0.62068	0.42794
0.5	0.86536	0.52935	0.5554	0.21703
1	0.48286	0.5169	0.40558	0.15531
1.5	0.32714	0.48882	0.32643	0.12625
2	0.17895	0.53961	0.32122	0.09683
2.5	0.19878	0.38529	0.24399	0.05694
3	0.08541	0.30637	0.23657	0.06453
3.5	0.27836	0.24391	0.32321	0.0706
4	0.22025	0.16985	0.2436	0.06783
4.5	0.15083	0.25483	0.23243	0.11325
5	0.10197	0.27797	0.22947	0.07319
5.5	0.201	0.41801	0.34943	0.09967
6	0.04483	0.49601	0.19551	0.11077
6.5	0.13561	0.74873	0.24648	0.11504
7	0.14997	0.84915	0.33859	0.08444
7.5	0.24972	0.86711	0.19286	0.13929
8	0.11475	0.87656	0.26916	0.11132
8.5	0.12931	0.86252	0.15985	0.14759
9	0.17753	0.83451	0.22548	0.14253
9.5	0.25078	0.77496	0.24455	0.13902
10	0.45047	0.65279	0.21292	0.11552
10.5	0.54858	0.54522	0.24073	0.08111
11	0.70264	0.38935	0.19942	0.11105
11.5	0.85033	0.31154	0.33071	0.23321
12	0.97075	0.55342	0.7989	0.30423
12.5	0.92561	0.16288	0.57921	0.21224
13	0.61294	0.18554	0.49357	0.16994
13.5	0.33897	0.14363	0.66333	0.13409
14	0.41781	0.17174	0.66343	0.00637
14.5	0.21253	0.18087	0.67893	0.06241
15	0.17578	0.14606	0.81016	0.07933
15.5	0.05519	0.19457	0.85925	0.10138
16	0.21411	0.17206	0.78693	0.04043
16.5	0.19258	0.10818	0.88433	0.02969
17	0.09392	0.21711	0.75008	0.0548
17.5	0.37061	0.26211	0.76063	0.12499
18	0.30733	0.21524	0.62762	0.166
18.5	0.38753	0.29006	0.52985	0.10501
19	0.40361	0.39196	0.34682	0.06937
19.5	0.09478	0.46319	0.24757	0.06993
20	0.01214	0.57324	0.16263	0.08731
20.5	0.01653	0.70931	0.17942	0.22328
21	0.26961	0.79123	0.16202	0.20594
21.5	0.69736	0.83496	0.07681	0.22047
22	0.75989	0.80419	0.09746	0.24911
22.5	0.74453	0.89604	0.13668	0.17637
23	0.73483	0.60301	0.08658	0.08126
23.5	0.86386	0.52565	0.1241	0.20149
24	0.93111	0.65796	0.64402	0.44971
24.5	0.83197	0.5539	0.45753	0.25791
25	0.23767	0.46913	0.30188	0.15288
25.5	0.42164	0.52278	0.20885	0.10597
26	0.39564	0.42603	0.21071	0.06174
26.5	0.24008	0.37097	0.16804	0.04798
27	0.04442	0.31201	0.33607	0.05106
27.5	0.05517	0.37207	0.28607	0.10756
28	0.26255	0.12972	0.20799	0.1018
28.5	0.15275	0.24114	0.20376	0.03751
29	0.12178	0.22677	0.27721	0.0705
29.5	0.16278	0.31682	0.35553	0.09757
30	0.13195	0.53399	0.17032	0.11367
30.5	0.14092	0.71064	0.35221	0.14045
31	0.11964	0.86154	0.28366	0.10476
31.5	0.20264	0.88271	0.28412	0.09447
32	0.09572	0.88757	0.22868	0.10296
32.5	0.14172	0.86769	0.16142	0.12355
33	0.16075	0.87929	0.25599	0.14365
33.5	0.17989	0.8124	0.21986	0.15824
34	0.36842	0.77356	0.22868	0.15902
34.5	0.4997	0.66728	0.32142	0.12714
35	0.63778	0.47156	0.244	0.15031
35.5	0.87717	0.40796	0.24147	0.27048
36	0.89675	0.55527	0.7771	0.26139
36.5	0.67764	0.1466	0.44217	0.11146
37	0.47233	0.2979	0.48026	0.04731
37.5	0.27886	0.19438	0.60282	0.11052
38	0.07047	0.3424	0.69188	0.06181
38.5	0.35911	0.25949	0.67332	0.04986
39	0.06967	0.18879	0.79059	0.0447
39.5	0.4153	0.09767	0.84679	0.06352
40	0.40647	0.16589	0.90461	0.0387
40.5	0.10744	0.21718	0.87896	0.06955
41	0.07133	0.20971	0.86064	0.05256
41.5	0.15808	0.21684	0.75007	0.04255
42	0.25767	0.17719	0.72159	0.11559
42.5	0.11436	0.12788	0.70024	0.12677
43	0.33497	0.35431	0.50132	0.08663
43.5	0.28939	0.44532	0.47208	0.08032
44	0.29708	0.6464	0.36125	0.11249
44.5	0.20383	0.74767	0.3489	0.11138
45	0.19022	0.74428	0.26335	0.11329
45.5	0.38608	0.85665	0.17008	0.22247
46	0.53233	0.80814	0.19529	0.23151
46.5	0.73272	0.7439	0.0954	0.19556
47	0.70925	0.5771	0.15549	0.20371
47.5	0.83547	0.71414	0.10565	0.13047
48	0.92892	0.53992	0.59422	0.15409
48.5	0.82325	0.35245	0.5325	0.21225
49	0.74672	0.252	0.47102	0.25504
49.5	0.64656	0.23876	0.39082	0.21318
50	0.53892	0.21685	0.30581	0.3088
50.5	0.55258	0.40825	0.2195	0.18268
51	0.05828	0.46454	0.26136	0.24905
51.5	0.09297	0.31229	0.2311	0.31717
52	0.03958	0.56908	0.14134	0.43041
52.5	0.02919	0.84978	0.14161	0.44584
53	0.33695	0.91559	0.11428	0.40588
53.5	0.39358	0.9285	0.09938	0.28888
54	0.15306	0.93615	0.14938	0.30174
54.5	0.19225	0.94477	0.09102	0.38017
55	0.29142	0.94468	0.1131	0.37689
55.5	0.4835	0.94731	0.15227	0.29997
56	0.90047	0.93128	0.15606	0.30064
56.5	0.76928	0.74874	0.19977	0.31401
57	0.85689	0.53093	0.37042	0.38171
57.5	0.93356	0.45775	0.2401	0.29686
58	0.91733	0.39535	0.36913	0.29782
58.5	0.93175	0.24503	0.4142	0.34183
59	0.92894	0.19808	0.60602	0.24597
59.5	0.94875	0.1705	0.70826	0.22578
60	0.9467	0.14628	0.38871	0.3465
60.5	0.94317	0.09831	0.59264	0.40751
61	0.94864	0.12821	0.39133	0.33495
61.5	0.82931	0.15736	0.26192	0.24294
62	0.62811	0.27993	0.14913	0.23667
62.5	0.46381	0.36824	0.36825	0.32961
63	0.3888	0.31633	0.20484	0.33977
63.5	0.41142	0.55457	0.2584	0.33504
64	0.49389	0.67405	0.2296	0.33323
64.5	0.23809	0.67732	0.18539	0.22226
65	0.29022	0.78435	0.30037	0.24105
65.5	0.09131	0.89418	0.23713	0.27935
66	0.12133	0.82022	0.42336	0.25662
66.5	0.07217	0.7126	0.49215	0.31399
67	0.0228	0.45271	0.47359	0.29589
67.5	0.18669	0.49754	0.66058	0.27551
68	0.05717	0.34893	0.74722	0.22606
68.5	0.24295	0.34906	0.71568	0.23527
69	0.08642	0.27588	0.78607	0.27119
69.5	0.29078	0.24938	0.80543	0.28706
70	0.71025	0.23272	0.86164	0.24813
70.5	0.65311	0.44258	0.84258	0.17964
71	0.73547	0.31073	0.84439	0.15568
71.5	0.77342	0.46138	0.85258	0.16711
72	0.60328	0.88847	0.88721	0.19604
72.5	0.71378	0.93747	0.88797	0.26206
73	0.45108	0.93239	0.89238	0.31705
73.5	0.33744	0.93832	0.86004	0.27836
74	0.27303	0.94428	0.80067	0.35208
74.5	0.03294	0.95004	0.81391	0.35058
75	0.33239	0.94315	0.79647	0.3595
75.5	0.41122	0.92059	0.74537	0.27394
76	0.22528	0.76989	0.73528	0.27413
76.5	0.00355	0.60577	0.61102	0.34131
77	0.17608	0.48545	0.51497	0.34875
77.5	0.29039	0.46965	0.54192	0.34457
78	0.06508	0.46404	0.42953	0.31107
78.5	0.28945	0.39393	0.28623	0.34588
79	0.58358	0.16799	0.31018	0.41212
79.5	0.6907	0.1045	0.22252	0.42281
80	0.65133	0.14379	0.20806	0.41274
80.5	0.80316	0.18389	0.13831	0.40398
81	0.7715	0.16075	0.13138	0.36323
81.5	0.85822	0.20726	0.05591	0.32133
82	0.92775	0.22378	0.10813	0.32238
82.5	0.93017	0.37235	0.07631	0.34972
83	0.92661	0.66653	0.13728	0.28449
83.5	0.93219	0.52793	0.12642	0.30202
84	0.94597	0.77449	0.17074	0.28576
84.5	0.95014	0.85204	0.144	0.33766
85	0.94814	0.79374	0.25309	0.41461
85.5	0.92678	0.80099	0.15826	0.36965
86	0.88931	0.46433	0.3047	0.35889
86.5	0.66745	0.20527	0.29703	0.20367
87	0.51425	0.12476	0.39083	0.26233
87.5	0.46244	0.24125	0.26378	0.27971
88	0.39364	0.33625	0.33962	0.30664
88.5	0.38086	0.35163	0.31315	0.28287
89	0.3685	0.20051	0.53321	0.28572
89.5	0.34378	0.33571	0.25847	0.1685
90	0.47192	0.42122	0.42041	0.22505
90.5	0.50128	0.6395	0.21741	0.19956
91	0.49561	0.76146	0.36192	0.24538
91.5	0.22742	0.90525	0.38377	0.3079
92	0.04239	0.91856	0.22	0.19391
92.5	0.04217	0.93191	0.40095	0.12792
93	0.0303	0.94009	0.4332	0.13071
93.5	0.04261	0.93825	0.23922	0.1888
94	0.17033	0.93817	0.39661	0.2996
94.5	0.29891	0.91976	0.40596	0.32764
95	0.67297	0.89685	0.35994	0.33273
95.5	0.51014	0.82152	0.30349	0.24811
96	0.52928	0.63054	0.42156	0.21248
96.5	0.26536	0.47781	0.72399	0.22207
97	0.19308	0.35879	0.56679	0.21642
97.5	0.17959	0.20867	0.74081	0.18759
98	0.42955	0.26853	0.80008	0.2911
98.5	0.4387	0.46555	0.8539	0.33432
99	0.10853	0.1859	0.79199	0.25098
99.5	0.21528	0.07388	0.85511	0.17275
100	0.0978	0.17256	0.86449	0.32721
100.5	0.1907	0.13003	0.88395	0.40448
101	0.14606	0.29022	0.87199	0.26484
101.5	0.05995	0.19221	0.86164	0.28751
102	0.422	0.37113	0.81864	0.21432
102.5	0.28572	0.54909	0.81904	0.17977
103	0.74472	0.71915	0.79901	0.33067
103.5	0.69369	0.88301	0.7844	0.31524
104	0.60605	0.75458	0.74597	0.2771
104.5	0.73267	0.57188	0.62197	0.30063
105	0.71278	0.34721	0.61157	0.29211
105.5	0.92514	0.41324	0.58354	0.2359
106	0.91092	0.22178	0.40578	0.33102
106.5	0.9133	0.27305	0.25878	0.32499
107	0.93903	0.18682	0.28081	0.27678
107.5	0.92789	0.12725	0.24399	0.19788
108	0.93981	0.30096	0.1832	0.27758
108.5	0.94108	0.39479	0.19721	0.32071
109	0.93953	0.20846	0.13091	0.29268
109.5	0.93397	0.43717	0.08785	0.25631
110	0.92339	0.73594	0.15264	0.17899
110.5	0.80225	0.88924	0.13458	0.24593
111	0.602	0.93354	0.15828	0.30369
111.5	0.35389	0.94086	0.12331	0.302
112	0.28292	0.94253	0.11287	0.27776
112.5	0.19259	0.94203	0.12839	0.38969
113	0.20978	0.9352	0.1931	0.28315
113.5	0.26728	0.91082	0.21832	0.33821
114	0.38047	0.79545	0.31967	0.2419
114.5	0.37053	0.59229	0.29638	0.2609
115	0.21972	0.53785	0.26822	0.32214
115.5	0.27142	0.4245	0.26759	0.36167
116	0.08272	0.31225	0.38952	0.24881
116.5	0.10822	0.31166	0.46508	0.25918
117	0.03564	0.34596	0.43854	0.3219
117.5	0.08972	0.12394	0.35145	0.35792
118	0.34908	0.17925	0.17988	0.29536
118.5	0.33647	0.08449	0.2887	0.20946
119	0.47347	0.20813	0.40899	0.22812
119.5	0.68489	0.37452	0.32404	0.2781
120	0.43964	0.3551	0.28868	0.33764
120.5	0.21928	0.41646	0.24735	0.3549
121	0.05211	0.39501	0.44922	0.34711
121.5	0.04972	0.54538	0.45788	0.32654
122	0.31892	0.81012	0.34758	0.3843
122.5	0.16528	0.82114	0.37256	0.32008
123	0.21378	0.83933	0.39072	0.26118
123.5	0.11281	0.63457	0.40731	0.30175
124	0.27808	0.24097	0.43624	0.30873
124.5	0.25961	0.25921	0.56778	0.30222
125	0.06395	0.24474	0.39612	0.34369
125.5	0.46478	0.14602	0.55269	0.31072
126	0.54886	0.16382	0.75194	0.17994
126.5	0.47022	0.25279	0.80493	0.38738
127	0.46369	0.34053	0.81394	0.3186
127.5	0.70239	0.33784	0.80103	0.28085
128	0.64905	0.43127	0.68104	0.3042
128.5	0.65083	0.52779	0.80362	0.2962
129	0.63575	0.75492	0.85999	0.18762
129.5	0.92075	0.9281	0.85066	0.21904
130	0.91111	0.93956	0.84969	0.17392
130.5	0.90989	0.93753	0.8616	0.30771
131	0.91872	0.94321	0.8358	0.30258
131.5	0.92578	0.93832	0.79557	0.3232
132	0.92539	0.9359	0.76853	0.40399
132.5	0.93556	0.91679	0.72313	0.36947
133	0.93153	0.88515	0.61296	0.2627
133.5	0.92853	0.75883	0.61709	0.21165
134	0.92311	0.5119	0.47497	0.3277
134.5	0.74758	0.34972	0.47029	0.33033
135	0.68028	0.31779	0.4083	0.25758
135.5	0.36981	0.36463	0.3344	0.3021
136	0.12978	0.30592	0.24421	0.30479
136.5	0.22906	0.30027	0.1987	0.18946
137	0.0367	0.26876	0.27028	0.21215
137.5	0.13608	0.24976	0.19639	0.20238
138	0.10967	0.25321	0.15366	0.36232
138.5	0.20808	0.27084	0.15636	0.39473
139	0.29892	0.36196	0.18423	0.36881
139.5	0.38767	0.31404	0.12079	0.32024
140	0.08814	0.40126	0.18668	0.2198
140.5	0.06439	0.49507	0.09197	0.27296
141	0.05664	0.73428	0.12977	0.36136
141.5	0.17558	0.77006	0.1913	0.3435
142	0.23583	0.77582	0.18458	0.22376
142.5	0.52497	0.55131	0.29521	0.27283
143	0.53478	0.46062	0.21067	0.32103
143.5	0.55733	0.28839	0.3223	0.37158

## Sheet: Fig 5_S2B
Fig 5_S2B
T(hours)	Grooming (fraction of time)
	cyc01	clkJRK
0	0.140624	0.0808586
0.5	0.131239	0.0929798
1	0.16159	0.121374
1.5	0.0786154	0.0616869
2	0.134564	0.0838485
2.5	0.126402	0.072101
3	0.146197	0.0868182
3.5	0.108923	0.0482929
4	0.165274	0.0612626
4.5	0.113043	0.0546768
5	0.101239	0.0800404
5.5	0.128812	0.0711414
6	0.121915	0.0461616
6.5	0.0792991	0.075899
7	0.157026	0.0638081
7.5	0.129043	0.0709293
8	0.138342	0.0554949
8.5	0.102872	0.048899
9	0.148803	0.064697
9.5	0.175487	0.0615556
10	0.136274	0.0649293
10.5	0.130316	0.0862424
11	0.0984274	0.0453737
11.5	0.119667	0.0318182
12	0.0956923	0.0913737
12.5	0.160983	0.0923939
13	0.148179	0.0489091
13.5	0.140624	0.0693333
14	0.135496	0.0837374
14.5	0.125547	0.0435657
15	0.114496	0.0796465
15.5	0.157701	0.0581616
16	0.153538	0.0980606
16.5	0.141778	0.0514747
17	0.140675	0.0524141
17.5	0.107701	0.0525859
18	0.181487	0.0774747
18.5	0.147838	0.0780505
19	0.114094	0.0931717
19.5	0.17947	0.0742929
20	0.153214	0.0862323
20.5	0.175573	0.0576465
21	0.138547	0.0532222
21.5	0.124624	0.0645758
22	0.187197	0.0834646
22.5	0.149547	0.0911313
23	0.126393	0.124889
23.5	0.10294	0.0685556
24	0.153872	0.0971111
24.5	0.151915	0.0900101
25	0.155675	0.106172
25.5	0.116598	0.10304
26	0.140214	0.0927576
26.5	0.114897	0.0732626
27	0.191632	0.0644848
27.5	0.153333	0.0663737
28	0.130308	0.0676768
28.5	0.135607	0.0527475
29	0.115077	0.0604444
29.5	0.116231	0.0506566
30	0.143684	0.0965657
30.5	0.159803	0.0553434
31	0.182991	0.0614545
31.5	0.194291	0.0608283
32	0.0872222	0.0662929
32.5	0.173085	0.0884141
33	0.122034	0.0547172
33.5	0.15441	0.0483232
34	0.11141	0.0970606
34.5	0.10712	0.0525758
35	0.160863	0.0577576
35.5	0.165179	0.0785354
36	0.144231	0.0577576
36.5	0.143573	0.0657071
37	0.109145	0.088404
37.5	0.134162	0.0376768
38	0.144128	0.100131
38.5	0.14788	0.0825758
39	0.161897	0.0753939
39.5	0.147274	0.0628081
40	0.149983	0.0478182
40.5	0.138667	0.0543939
41	0.125795	0.0773131
41.5	0.116906	0.0872323
42	0.171316	0.0932626
42.5	0.182308	0.0668081
43	0.158803	0.0907172
43.5	0.115077	0.0575556
44	0.124872	0.0914949
44.5	0.128641	0.0799394
45	0.190863	0.0696364
45.5	0.121769	0.0479394
46	0.129624	0.0640707
46.5	0.137453	0.0683838
47	0.15594	0.0822727
47.5	0.156701	0.111101
48	0.161222	0.0650303
48.5	0.151863	0.0642222
49	0.148684	0.0876162
49.5	0.141325	0.0885657
50	0.185667	0.0791919
50.5	0.164496	0.0694545
51	0.198171	0.0585657
51.5	0.144863	0.0908283
52	0.17265	0.0781515
52.5	0.139564	0.0653636
53	0.202462	0.0914343
53.5	0.168256	0.0629192
54	0.127359	0.0807273
54.5	0.15	0.0643939
55	0.181017	0.0416465
55.5	0.126786	0.0566263
56	0.12041	0.0502929
56.5	0.147034	0.110172
57	0.173709	0.074798
57.5	0.110316	0.0310606
58	0.153615	0.0558889
58.5	0.0934615	0.11401
59	0.144162	0.101879
59.5	0.125684	0.0655657
60	0.174735	0.0923131
60.5	0.134897	0.0590202
61	0.18806	0.0665051
61.5	0.11494	0.0866566
62	0.112632	0.0690202
62.5	0.157709	0.0542929
63	0.152778	0.0778182
63.5	0.107188	0.0962323
64	0.184333	0.0617172
64.5	0.170231	0.0532323
65	0.166991	0.053101
65.5	0.0916581	0.0660404
66	0.0879402	0.0458788
66.5	0.182291	0.0652828
67	0.184615	0.0870303
67.5	0.140521	0.0486869
68	0.128949	0.0750808
68.5	0.154325	0.0825859
69	0.219607	0.0587576
69.5	0.112769	0.0757576
70	0.154906	0.113384
70.5	0.139923	0.0656566
71	0.128222	0.053404
71.5	0.135872	0.110677

## Sheet: Fig 5_S2C
Fig 5_S2C
Period(hours)	average spectra	Spectra of individual flies
		fly#1	fly#2	fly#3	fly#4	fly#5	fly#6	fly#7	fly#8	fly#9	fly#10	fly#11	fly#12	fly#13
35.75	1.16852	1.27453	0.803018	2.78023	0.0931568	0.863325	0.478376	1.33149	0.172022	3.05975	0.662869	1.4592	1.80446	0.408339
31.7778	1.1137	1.71652	0.751456	2.09807	0.0915122	0.794643	0.224266	1.89697	0.309441	4.01987	0.912255	1.1064	0.29767	0.259087
28.6	1.03213	1.57601	0.33788	0.658855	0.352207	0.639696	0.0254048	2.24917	0.415645	4.01655	1.11713	0.424106	0.236871	1.36821
26	1.08977	1.27391	0.0513028	0.0355935	0.418518	0.627257	0.208046	2.58769	0.241451	2.95444	1.27332	0.181752	1.45859	2.85509
23.8333	0.987835	1.22581	0.0617959	0.276483	0.257347	0.454866	0.601789	2.09314	0.0231517	1.29434	1.07142	0.307217	2.15099	3.0235
22	0.705992	0.942481	0.451445	0.733173	0.164185	0.152678	0.904022	1.09864	0.125515	0.327091	0.641317	0.503523	1.40355	1.73027
20.4286	0.52689	0.371349	1.13307	0.757315	0.294857	0.0589144	0.866579	0.173795	0.538089	0.233399	0.228216	0.658915	0.621145	0.913926
19.0667	0.684557	0.0542898	1.63031	0.505731	0.490089	0.600745	0.665105	0.138458	0.974278	0.855621	0.117262	0.634981	1.12378	1.1086
17.875	1.00664	0.228359	1.42072	0.32976	0.503874	1.60954	0.39573	1.4122	1.36662	1.61202	0.447137	0.397304	1.89999	1.46305
16.8235	1.23599	0.508186	0.808412	0.428478	0.28055	2.45032	0.112926	3.76623	1.74006	2.00385	0.870083	0.138197	1.84184	1.1188
15.8889	1.30508	0.506406	0.278459	0.539492	0.226321	2.80137	0.0180336	5.7755	2.04094	1.93248	1.03884	0.0130319	1.18417	0.611035

## Sheet: Fig 5_S2D
Fig 5_S2D
Period(hours)	average spectra	Spectra of individual flies
		fly#1	fly#2	fly#3	fly#4	fly#5	fly#6	fly#7	fly#8	fly#9	fly#10	fly#11
35.75	0.993745	6.86947	0.302071	0.380004	0.498558	0.53622	0.873529	0.445236	0.26169	0.0355444	0.460799	0.26807
31.7778	1.14445	5.68493	0.0181646	2.31334	0.890556	0.0792729	2.14087	0.420197	0.308352	0.104995	0.387286	0.240956
28.6	1.55475	3.09027	1.05195	7.15922	1.11576	0.0568787	2.99538	0.627934	0.268003	0.193899	0.394173	0.148786
26	2.04751	1.75548	3.03144	11.6354	1.17482	0.237354	2.93995	0.809057	0.118385	0.395863	0.352014	0.0728715
23.8333	2.06987	2.37389	4.00807	11.4847	0.862244	0.181294	2.05995	0.624199	0.0389993	0.808369	0.236261	0.090643
22	1.56952	2.95194	2.86514	7.69081	0.380923	0.00924973	1.50438	0.191035	0.162052	1.17715	0.168428	0.1636
20.4286	0.981094	2.20046	0.986552	3.7993	0.195972	0.194579	1.3893	0.00574199	0.345367	1.20691	0.182949	0.284902
19.0667	0.577514	0.560489	0.0533933	1.49334	0.338934	0.783244	1.11544	0.252251	0.370669	0.766614	0.212722	0.405559
17.875	0.453049	0.210788	0.133108	0.611989	0.482358	1.15251	0.648193	0.51666	0.290668	0.217718	0.212727	0.506821
16.8235	0.466661	1.33515	0.286086	0.48123	0.355486	0.882728	0.193511	0.402145	0.371537	0.200963	0.178506	0.445932
15.8889	0.460252	1.83115	0.164654	0.585504	0.244828	0.329794	0.0169325	0.085195	0.721492	0.718168	0.138783	0.226272
