# Supplementary material for: Automated analysis of long-term grooming behavior in Drosophila using a k-nearest neighbors classifier
Source: eLife. 2018 Feb 27;7:e34497. doi: 10.7554/eLife.34497 (PMC5860874; doi:10.7554/eLife.34497)
Supplement: Figure 5—source data 4. [file elife-34497-fig5-data4.xlsx]

## Sheet: fly#1
Fig 4_S3
Fraction of time in behaviors								Power spectra
t(hours)	grooming	locomotion	wakefulness	shuffled groomng	modified locomotion	modified wakefulness		Period(hours)	grooming	locomotion	wakefulness	shuffled groomng	modified locomotion	modified wakefulness
0	0.13267	0.56978	1	0.18722	0.51523	0.94545		35.75	0.3259	0.08101	0.01265	0.46075	0.00128	0.01513
0.5	0.14333	0.29967	0.66367	0.18333	0.25967	0.62367		31.7778	0.6415	1.75757	0.91042	0.07908	1.24444	0.74434
1	0.00244	0.03478	0.00244	0.12844	-0.09122	-0.12356		28.6	4.3612	7.0096	4.40039	0.44809	6.45581	4.38732
1.5	0	0.01667	0	0.01722	-0.00055	-0.01722		26	11.5018	15.2176	10.337	1.80242	15.2626	10.9386
2	0.03044	0.36956	0.576	0.01189	0.38811	0.59455		23.8333	16.382	20.0476	14.4517	3.23196	20.755	15.5708
2.5	0.15511	0.383	0.80122	0.16267	0.37544	0.79366		22	15.578	18.9178	14.4536	3.03243	19.3668	15.3311
3	0.01622	0.02867	0.03578	0.04067	0.00422	0.01133		20.4286	10.1846	12.6952	10.2304	1.26289	12.2214	10.2888
3.5	0.03411	0.000888889	0.15056	0.14233	-0.10733	0.04234		19.0667	3.23647	4.10995	3.54964	0.38013	3.41026	3.16684
4	0.00189	0.00233	0.04267	0.17489	-0.17067	-0.13033		17.875	0.27158	0.20176	0.08777	1.30107	0.34691	0.10795
4.5	0.01856	0.01089	0.066	0.07056	-0.04111	0.014		16.8235	1.5429	2.39699	1.52455	2.97365	3.31203	2.10701
5	0.07389	0.00133	0.21256	0.10922	-0.034	0.17723		15.8889	2.77329	5.25404	3.65051	3.40447	5.86721	4.17081
5.5	0.11778	0.32489	0.61278	0	0.44267	0.73056
6	0.09889	0.03256	0.20911	0	0.13145	0.308
6.5	0.00533	0.00333	0.085	0	0.00866	0.09033
7	0.04022	0.06756	0.26156	0.00533	0.10245	0.29645
7.5	0.15567	0.51633	1	0.02333	0.64867	1.13234
8	0.15822	0.62822	1	0.038	0.74844	1.12022
8.5	0.13078	0.27922	0.64033	0.08011	0.32989	0.691
9	0.124	0.46011	0.94433	0.07389	0.51022	0.99444
9.5	0.14767	0.61111	1	0.08844	0.67034	1.05923
10	0.18722	0.53522	1	0	0.72244	1.18722
10.5	0.15644	0.57589	1	0.01122	0.72111	1.14522
11	0.174	0.62	1	0.04022	0.75378	1.13378
11.5	0.11267	0.64644	1	0.01711	0.742	1.09556
12	0.14289	0.64856	1	0.17511	0.61634	0.96778
12.5	0.12844	0.67344	1	0	0.80188	1.12844
13	0.12844	0.66044	1	0.05389	0.73499	1.07455
13.5	0.116	0.66522	1	0.19567	0.58555	0.92033
14	0.18989	0.50111	1	0.07711	0.61389	1.11278
14.5	0.12344	0.355	0.66667	0.15567	0.32277	0.63444
15	0.16267	0.149	0.68844	0	0.31167	0.85111
15.5	0	0.00133	0	0.20533	-0.204	-0.20533
16	0.00433	0.00467	0.01467	0.20467	-0.19567	-0.18567
16.5	0.042	0.00167	0.19389	0.101	-0.05733	0.13489
17	0.11489	0.08456	0.30889	0.11078	0.08867	0.313
17.5	0	0.10567	0.11256	0	0.10567	0.11256
18	0.04833	0.16133	0.26522	0.202	0.00766	0.11155
18.5	0.08044	0.00967	0.38856	0.14767	-0.05756	0.32133
19	0	0.00122	0	0.08367	-0.08245	-0.08367
19.5	0.08011	0.00533	0.30489	0.00611	0.07933	0.37889
20	0.04067	0.00433	0.20533	0.14744	-0.10244	0.09856
20.5	0.05333	0.01078	0.09844	0.174	-0.10989	-0.02223
21	0.00178	0.01522	0.04422	0.00178	0.01522	0.04422
21.5	0.15344	0.34133	0.80844	0.17422	0.32055	0.78766
22	0.19867	0.55522	1	0	0.75389	1.19867
22.5	0.05389	0.38322	0.78144	0.13878	0.29833	0.69655
23	0.07711	0.61511	1	0.01478	0.67744	1.06233
23.5	0.08822	0.12278	0.57533	0.07822	0.13278	0.58533
24	0.003	0.01144	0.00311	0	0.01444	0.00611
24.5	0.02533	0.23356	0.24611	0.00367	0.25522	0.26777
25	0.00611	0.00333	0.00622	0.08822	-0.07878	-0.07589
25.5	0.01711	0.048	0.15444	0.09889	-0.03378	0.07266
26	0.02067	0.00744	0.16078	0.08044	-0.05233	0.10101
26.5	0.00233	0.00144	0.00244	0.00233	0.00144	0.00244
27	0.08844	0.30878	0.498	0.12644	0.27078	0.46
27.5	0.10889	0.24733	0.755	0.02533	0.33089	0.83856
28	0	0.00833	0.00011	0.12844	-0.12011	-0.12833
28.5	0	0.00333	0	0.19356	-0.19023	-0.19356
29	0.18333	0.32611	0.84478	0.02067	0.48877	1.00744
29.5	0.04444	0.00367	0.05922	0	0.04811	0.10366
30	0.02456	0.00133	0.02811	0.13078	-0.10489	-0.07811
30.5	0.101	0.024	0.12867	0.10889	0.01611	0.12078
31	0	0.00667	0	0.00244	0.00423	-0.00244
31.5	0.15089	0.40322	0.79656	0.19089	0.36322	0.75656
32	0.07056	0.20289	0.54878	0	0.27345	0.61934
32.5	0.07111	0.44633	0.72033	0	0.51744	0.79144
33	0.06467	0.51422	0.82433	0.14011	0.43878	0.74889
33.5	0.20533	0.43822	1	0.09078	0.55277	1.11455
34	0.07011	0.64644	1	0	0.71655	1.07011
34.5	0.22589	0.50433	1	0.07111	0.65911	1.15478
35	0.10844	0.62933	1	0.03044	0.70733	1.078
35.5	0.15311	0.63189	1	0.11778	0.66722	1.03533
36	0.14744	0.64344	1	0.15311	0.63777	0.99433
36.5	0.11644	0.63956	1	0.07689	0.67911	1.03955
37	0.11078	0.65811	1	0.11833	0.65056	0.99245
37.5	0.195	0.56122	1	0	0.75622	1.195
38	0.26656	0.49389	1	0.15644	0.60401	1.11012
38.5	0	0.05644	0.07333	0.14333	-0.08689	-0.07
39	0	0.00178	0.00011	0.01156	-0.00978	-0.01145
39.5	0	0.01533	0	0.04256	-0.02723	-0.04256
40	0	0.00267	0	0.15089	-0.14822	-0.15089
40.5	0	0.000777778	0	0.076	-0.07522	-0.076
41	0	0.03867	0	0.04444	-0.00577	-0.04444
41.5	0	0.000222222	0	0.04811	-0.04789	-0.04811
42	0.02256	0.31456	0.40856	0.03411	0.30301	0.39701
42.5	0.20467	0.34011	1	0	0.54478	1.20467
43	0.04811	0.48956	0.747	0.00433	0.53334	0.79078
43.5	0.05989	0.10844	0.38789	0.11222	0.05611	0.33556
44	0	0.00244	0	0.14989	-0.14745	-0.14989
44.5	0	0.000222222	0.00011	0.15344	-0.15322	-0.15333
45	0	0.00233	0.00011	0	0.00233	0.00011
45.5	0.00367	0.00433	0.00467	0	0.008	0.00834
46	0.07689	0.01356	0.37833	0.26656	-0.17611	0.18866
46.5	0.14233	0.43011	0.96378	0.13267	0.43977	0.97344
47	0.03867	0.22333	0.49656	0.15656	0.10544	0.37867
47.5	0.04256	0.000222222	0.43078	0.06467	-0.02189	0.40867
48	0	0.000111111	0	0.01856	-0.01845	-0.01856
48.5	0.01889	0.11211	0.34222	0	0.131	0.36111
49	0.06411	0.09911	0.31833	0.116	0.04722	0.26644
49.5	0.00178	0.01122	0.10222	0	0.013	0.104
50	0.07822	0.09411	0.35844	0.15822	0.01411	0.27844
50.5	0.09078	0.305	0.506	0	0.39578	0.59678
51	0.07467	0.13	0.62622	0.042	0.16267	0.65889
51.5	0.038	0.000555556	0.07533	0.124	-0.08544	-0.01067
52	0.02333	0.00644	0.028	0	0.02977	0.05133
52.5	0.08367	0.19356	0.46833	0.00178	0.27545	0.55022
53	0.11833	0.217	0.51767	0.11489	0.22044	0.52111
53.5	0	0	0	0.02256	-0.02256	-0.02256
54	0.00178	0.00611	0.00189	0.03867	-0.03078	-0.035
54.5	0.01478	0.001	0.01933	0.04833	-0.03255	-0.01422
55	0.13878	0.53533	0.85956	0.11644	0.55767	0.8819
55.5	0.21333	0.39922	0.96733	0.00189	0.61066	1.17877
56	0.07644	0.39211	0.66211	0.07467	0.39388	0.66388
56.5	0.15656	0.56089	1	0.15511	0.56234	1.00145
57	0.202	0.40978	0.778	0.01622	0.59556	0.96378
57.5	0.10922	0.61011	1	0.00178	0.71755	1.10744
58	0.19222	0.55478	1	0.04389	0.70311	1.14833
58.5	0.14989	0.60956	1	0.02456	0.73489	1.12533
59	0.16922	0.59311	1	0.12389	0.63844	1.04533
59.5	0.17489	0.57122	1	0.05989	0.68622	1.115
60	0.11222	0.65644	1	0.02156	0.7471	1.09066
60.5	0.17422	0.60233	1	0.17144	0.60511	1.00278
61	0.17144	0.59733	1	0.01889	0.74988	1.15255
61.5	0.19567	0.57244	1	0.07011	0.698	1.12556
62	0.19089	0.53733	1	0.18989	0.53833	1.001
62.5	0.19356	0.38978	1	0.19222	0.39112	1.00134
63	0.02156	0.02978	0.11256	0.10844	-0.0571	0.02568
63.5	0	0.01344	0.03211	0.21333	-0.19989	-0.18122
64	0	0.03289	0	0	0.03289	0
64.5	0	0.01589	0	0.06411	-0.04822	-0.06411
65	0	0.002	0	0.14289	-0.14089	-0.14289
65.5	0	0.04011	0.11411	0	0.04011	0.11411
66	0.076	0.28189	0.68622	0	0.35789	0.76222
66.5	0.17511	0.35478	1	0.07644	0.45345	1.09867
67	0.01122	0.07678	0.265	0.003	0.085	0.27322
67.5	0	0.00867	0	0.11267	-0.104	-0.11267
68	0	0.000111111	0	0.16922	-0.16911	-0.16922
68.5	0.01156	0.04489	0.15822	0.195	-0.13855	-0.02522
69	0.01722	0.00278	0.26289	0.19867	-0.17867	0.08144
69.5	0.01189	0.08578	0.185	0.22589	-0.12822	-0.029
70	0.12389	0.66244	1	0.12344	0.66289	1.00045
70.5	0.14011	0.59789	1	0	0.738	1.14011
71	0.12644	0.34244	0.81978	0.05333	0.41555	0.89289
71.5	0.04389	0.28556	1	0	0.32945	1.04389

## Sheet: fly#2
Fig 4_S3
Fraction of time in behaviors								Power spectra
t(hours)	grooming	locomotion	wakefulness	shuffled groomng	modified locomotion	modified wakefulness		Period(hours)	grooming	locomotion	wakefulness	shuffled groomng	modified locomotion	modified wakefulness
0	0.084	0.755	1	0.056	0.783	1.028		35.75	0.15759	0.06831	0.06585	0.17175	0.05087	0.06397
0.5	0.11644	0.71656	1	0	0.833	1.11644		31.7778	0.87189	0.93668	0.80601	0.50194	1.05081	0.86915
1	0.16878	0.57744	1	0.112	0.63422	1.05678		28.6	2.94438	5.27043	3.91007	0.55083	5.57733	4.15589
1.5	0.10822	0.45267	1	0.12033	0.44056	0.98789		26	7.72081	15.1276	11.5369	0.20825	15.3096	11.815
2	0.04333	0.00533	0.13144	0	0.04866	0.17477		23.8333	12.9422	23.9927	19.4215	0.01743	23.6315	19.3522
2.5	0.03167	0.236	0.39911	0.09211	0.17556	0.33867		22	15.5311	25.5736	21.9794	0.46697	24.7428	21.488
3	0	0	0	0	0	0		20.4286	13.4154	18.8472	17.2471	1.35153	17.922	16.5589
3.5	0	0.000111111	0	0.13056	-0.13045	-0.13056		19.0667	6.5276	6.71509	6.77285	2.06335	6.15537	6.28241
4	0.02056	0.01067	0.02189	0	0.03123	0.04245		17.875	1.75942	0.64346	1.13827	2.34312	0.47227	0.91158
4.5	0	0	0	0.13889	-0.13889	-0.13889		16.8235	2.55431	3.46994	4.12211	2.24463	3.37085	3.86776
5	0.10533	0.00311	0.16656	0	0.10844	0.27189		15.8889	5.38879	7.31151	8.76005	1.80242	7.13928	8.31615
5.5	0	0.01567	0	0.02056	-0.00489	-0.02056
6	0	0.01078	0.00011	0.04811	-0.03733	-0.048
6.5	0.02678	0.000111111	0.02678	0.11122	-0.08433	-0.05766
7	0	0	0	0.04333	-0.04333	-0.04333
7.5	0.04111	0.04578	0.10533	0	0.08689	0.14644
8	0.04811	0.75856	1	0.09389	0.71278	0.95422
8.5	0.07778	0.63511	1	0	0.71289	1.07778
9	0.12989	0.67	1	0	0.79989	1.12989
9.5	0.09211	0.74011	1	0.13378	0.69844	0.95833
10	0.06278	0.73444	1	0.01144	0.78578	1.05134
10.5	0.10811	0.725	1	0.02333	0.80978	1.08478
11	0.07589	0.74822	1	0.10856	0.71555	0.96733
11.5	0.09389	0.73844	1	0.00289	0.82944	1.091
12	0.08811	0.77411	1	0.09522	0.767	0.99289
12.5	0.07933	0.76044	1	0.13244	0.70733	0.94689
13	0.08889	0.724	1	0.00167	0.81122	1.08722
13.5	0.08033	0.77556	1	0.02678	0.82911	1.05355
14	0.13244	0.72233	1	0.05444	0.80033	1.078
14.5	0.11278	0.71333	1	0.07656	0.74955	1.03622
15	0.10356	0.719	1	0.03167	0.79089	1.07189
15.5	0.14878	0.631	1	0.03589	0.74389	1.11289
16	0.13378	0.52722	0.92111	0.14689	0.51411	0.908
16.5	0.03544	0.016	0.03867	0.02033	0.03111	0.05378
17	0.00544	0.00167	0.00544	0	0.00711	0.01088
17.5	0	0.00122	0	0.00178	-0.00056	-0.00178
18	0.00844	0.005	0.01133	0.12511	-0.11167	-0.10534
18.5	0	0.000111111	0	0.07589	-0.07578	-0.07589
19	0	0.001	0	0.01711	-0.01611	-0.01711
19.5	0.057	0.01889	0.13044	0.10533	-0.02944	0.08211
20	0.04433	0.005	0.06256	0.138	-0.08867	-0.03111
20.5	0	0.00611	0	0.07078	-0.06467	-0.07078
21	0.03944	0.00733	0.14111	0.04878	-0.00201	0.13177
21.5	0.01144	0.111	0.16456	0.13522	-0.01278	0.04078
22	0.03389	0.74967	1	0.04289	0.74067	0.991
22.5	0.11244	0.65867	1	0.084	0.68711	1.02844
23	0.11056	0.68189	1	0.07033	0.72212	1.04023
23.5	0.06211	0.73456	1	0.10356	0.69311	0.95855
24	0.06378	0.71322	1	0.09744	0.67956	0.96634
24.5	0.17689	0.51333	1	0.00456	0.68566	1.17233
25	0.11967	0.36256	0.71422	0.07456	0.40767	0.75933
25.5	0.01667	0.332	0.56289	0.14344	0.20523	0.43612
26	0.12033	0.28978	0.67533	0.14	0.27011	0.65566
26.5	0	0.01367	0.00022	0	0.01367	0.00022
27	0.03222	0.00822	0.28444	0	0.04044	0.31666
27.5	0	0.00667	0	0.14544	-0.13877	-0.14544
28	0.02856	0.17111	0.30011	0.09589	0.10378	0.23278
28.5	0	0.00156	0.00011	0.10389	-0.10233	-0.10378
29	0	0.001	0	0	0.001	0
29.5	0.09	0.00856	0.38422	0.03222	0.06634	0.442
30	0.00178	0.00544	0.01567	0	0.00722	0.01745
30.5	0.04878	0.333	0.78167	0.08789	0.29389	0.74256
31	0.09589	0.67422	1	0.14878	0.62133	0.94711
31.5	0.10389	0.59511	1	0	0.699	1.10389
32	0.14544	0.64411	1	0.10456	0.68499	1.04088
32.5	0.10011	0.68267	1	0.03389	0.74889	1.06622
33	0.10856	0.68033	1	0.07778	0.71111	1.03078
33.5	0.09522	0.68967	1	0.057	0.72789	1.03822
34	0.13889	0.721	1	0.11878	0.74111	1.02011
34.5	0.07078	0.76144	1	0.14556	0.68666	0.92522
35	0.10089	0.716	1	0.04222	0.77467	1.05867
35.5	0.14689	0.69489	1	0	0.84178	1.14689
36	0.08478	0.77856	1	0.00378	0.85956	1.081
36.5	0.08667	0.75433	1	0.06711	0.77389	1.01956
37	0.10022	0.73344	1	0.17467	0.65899	0.92555
37.5	0.07944	0.75656	1	0	0.836	1.07944
38	0.10533	0.72256	1	0.117	0.71089	0.98833
38.5	0.138	0.67867	1	0.06978	0.74689	1.06822
39	0.14556	0.62244	1	0.17689	0.59111	0.96867
39.5	0.13522	0.55767	1	0.11967	0.57322	1.01555
40	0.18933	0.36556	1	0	0.55489	1.18933
40.5	0.14867	0.44256	1	0.19956	0.39167	0.94911
41	0.06978	0.31489	0.70622	0.09	0.29467	0.686
41.5	0.12511	0.31144	0.76567	0	0.43655	0.89078
42	0.058	0.33767	0.62922	0.10011	0.29556	0.58711
42.5	0.03589	0.24311	0.77767	0.08889	0.19011	0.72467
43	0.10456	0.07033	0.35233	0.11244	0.06245	0.34445
43.5	0	0.000444444	0.00011	0.12378	-0.12334	-0.12367
44	0	0.00167	0	0.00544	-0.00377	-0.00544
44.5	0.00178	0.00467	0.002	0.058	-0.05155	-0.05422
45	0.00222	0.000444444	0.00222	0.08811	-0.08545	-0.08367
45.5	0.03644	0.006	0.058	0.06278	-0.02034	0.03166
46	0.02033	0.05656	0.39822	0.08667	-0.00978	0.33188
46.5	0.04222	0.03367	0.23156	0.16111	-0.08522	0.11267
47	0.13056	0.69356	1	0	0.82412	1.13056
47.5	0.08622	0.66256	1	0.08478	0.664	1.00144
48	0.19956	0.57522	1	0	0.77478	1.19956
48.5	0.01356	0.00767	0.084	0	0.02123	0.09756
49	0.04	0.17044	0.24378	0.08556	0.12488	0.19822
49.5	0.00189	0.01	0.064	0.02856	-0.01667	0.03733
50	0	0.00189	0	0.01344	-0.01155	-0.01344
50.5	0.056	0.16911	0.53789	0.11011	0.115	0.48378
51	0.00378	0.00533	0.07889	0.11278	-0.10367	-0.03011
51.5	0.00167	0.000777778	0.00167	0.04433	-0.04188	-0.04099
52	0.05444	0.00378	0.28244	0.00222	0.056	0.33466
52.5	0.04289	0.136	0.425	0.08622	0.09267	0.38167
53	0	0.00389	0	0.10089	-0.097	-0.10089
53.5	0.01344	0.00233	0.07533	0.12622	-0.11045	-0.03745
54	0.11011	0.47422	1	0.097	0.48733	1.01311
54.5	0.06711	0.01078	0.274	0.11644	-0.03855	0.22467
55	0.07033	0.53967	1	0.00844	0.60156	1.06189
55.5	0.08489	0.67256	1	0.14867	0.60878	0.93622
56	0.117	0.669	1	0.03544	0.75056	1.08156
56.5	0.06978	0.687	1	0.13378	0.623	0.936
57	0.12544	0.58189	1	0.10022	0.60711	1.02522
57.5	0.14344	0.66567	1	0.07944	0.72967	1.064
58	0.17467	0.64011	1	0.03944	0.77534	1.13523
58.5	0.09744	0.70144	1	0.18933	0.60955	0.90811
59	0.12378	0.69633	1	0.08489	0.73522	1.03889
59.5	0.097	0.72944	1	0.06211	0.76433	1.03489
60	0.08556	0.72733	1	0.02367	0.78922	1.06189
60.5	0.11122	0.71367	1	0.01667	0.80822	1.09455
61	0.13378	0.71167	1	0.12989	0.71556	1.00389
61.5	0.112	0.7	1	0.01356	0.79844	1.09844
62	0.08789	0.746	1	0.10533	0.72856	0.98256
62.5	0.16111	0.64533	1	0	0.80644	1.16111
63	0.12622	0.69533	1	0	0.82155	1.12622
63.5	0.14	0.29711	0.73022	0.12544	0.31167	0.74478
64	0	0.000333333	0	0.06378	-0.06345	-0.06378
64.5	0	0.00178	0	0.08033	-0.07855	-0.08033
65	0	0.000888889	0.00011	0.07933	-0.07844	-0.07922
65.5	0	0.000888889	0	0	0.000888889	0
66	0.07656	0.05678	0.37078	0.00189	0.13145	0.44545
66.5	0.00456	0.00511	0.02433	0.11056	-0.10089	-0.08167
67	0.01711	0.00356	0.02256	0	0.02067	0.03967
67.5	0	0.000444444	0	0.04111	-0.04067	-0.04111
68	0	0	0	0.06978	-0.06978	-0.06978
68.5	0	0.00533	0.14889	0.10811	-0.10278	0.04078
69	0.02333	0.000666667	0.02344	0.03644	-0.01244	0.01033
69.5	0.02367	0.03922	0.12933	0.10822	-0.04533	0.04478
70	0.00289	0.05189	0.00289	0.04	0.01478	-0.03422
70.5	0.11878	0.12911	0.57089	0.00178	0.24611	0.68789
71	0.02633	0.07844	0.28289	0.02633	0.07844	0.28289
71.5	0.07456	0.62911	1	0.16878	0.53489	0.90578

## Sheet: fly#3
Fig 4_S3
Fraction of time in behaviors								Power spectra
t(hours)	grooming	locomotion	wakefulness	shuffled groomng	modified locomotion	modified wakefulness		Period(hours)	grooming	locomotion	wakefulness	shuffled groomng	modified locomotion	modified wakefulness
0	0.08633	0.68489	1	0.07422	0.697	1.01211		35.75	0.25815	0.51677	0.28179	3.84939	0.29163	0.26187
0.5	0.07944	0.71478	1	0.14533	0.64889	0.93411		31.7778	0.08395	0.42007	0.61087	2.99327	0.61285	0.69966
1	0.08078	0.672	1	0.08811	0.66467	0.99267		28.6	1.61972	2.6242	2.18115	1.84299	3.15985	2.48619
1.5	0.097	0.45833	1	0	0.55533	1.097		26	6.14489	8.84349	6.37133	0.75406	9.29272	6.81982
2	0.08733	0.44722	0.758	0.08633	0.44822	0.759		23.8333	11.3631	16.489	11.7749	0.2155	16.426	12.1369
2.5	0.03889	0.00767	0.04889	0.01322	0.03334	0.07456		22	14.1571	20.66	15.5458	0.15475	20.1684	15.6847
3	0.01089	0.07878	0.19133	0.09078	-0.00111	0.11144		20.4286	12.9272	17.9752	14.8738	0.24091	17.6246	14.9059
3.5	0.011	0.10422	0.29711	0.16389	-0.04867	0.14422		19.0667	6.89778	9.2088	8.34977	0.13867	9.1017	8.36026
4	0	0.000555556	0	0.09533	-0.09477	-0.09533		17.875	1.37704	1.44223	1.57137	0.00285	1.46543	1.60415
4.5	0.01	0.11589	0.11978	0.07178	0.05411	0.058		16.8235	1.00427	0.68008	0.94752	0.10563	0.71105	0.93582
5	0.07422	0.19733	0.32811	0.07433	0.19722	0.328		15.8889	3.57104	3.9626	4.51132	0.33614	3.93966	4.38053
5.5	0	0	0	0.021	-0.021	-0.021
6	0.06378	0.53389	0.76256	0.04678	0.55089	0.77956
6.5	0.086	0.21089	0.46478	0.11811	0.17878	0.43267
7	0.04856	0.57089	0.93878	0.07056	0.54889	0.91678
7.5	0.08611	0.73511	1	0.2	0.62122	0.88611
8	0.18311	0.61344	1	0.08767	0.70888	1.09544
8.5	0.07678	0.732	1	0.07278	0.736	1.004
9	0.07633	0.71078	1	0.16889	0.61822	0.90744
9.5	0.09133	0.71156	1	0.07944	0.72345	1.01189
10	0.10911	0.69833	1	0.10911	0.69833	1
10.5	0.08278	0.75211	1	0.15867	0.67622	0.92411
11	0.06911	0.78011	1	0.08733	0.76189	0.98178
11.5	0.10033	0.75611	1	0.16878	0.68766	0.93155
12	0.09144	0.73744	1	0.09011	0.73877	1.00133
12.5	0.09356	0.75256	1	0.086	0.76012	1.00756
13	0.14722	0.69056	1	0.124	0.71378	1.02322
13.5	0.12033	0.69944	1	0.12533	0.69444	0.995
14	0.13389	0.67311	1	0.06933	0.73767	1.06456
14.5	0.16889	0.54267	1	0.14811	0.56345	1.02078
15	0.157	0.59311	1	0.162	0.58811	0.995
15.5	0.13889	0.53967	1	0.02089	0.65767	1.118
16	0.12533	0.37189	1	0.14678	0.35044	0.97855
16.5	0.06422	0.12567	0.44544	0.09144	0.09845	0.41822
17	0.02267	0.158	0.47167	0.13156	0.04911	0.36278
17.5	0.086	0.002	0.16422	0.16189	-0.07389	0.08833
18	0.01533	0.11922	0.309	0.08278	0.05177	0.24155
18.5	0.07433	0.01144	0.09911	0.01967	0.0661	0.15377
19	0.02689	0.00622	0.05044	0.09133	-0.05822	-0.014
19.5	0.05467	0.11711	0.36333	0.09789	0.07389	0.32011
20	0.04578	0.02478	0.11489	0.097	-0.02644	0.06367
20.5	0.03611	0.15644	0.15178	0.14978	0.04277	0.03811
21	0.06578	0.26322	0.40611	0.04578	0.28322	0.42611
21.5	0.16789	0.53167	0.99011	0.136	0.56356	1.022
22	0.05256	0.72344	1	0.14711	0.62889	0.90545
22.5	0.08567	0.724	1	0.12544	0.68423	0.96023
23	0.14711	0.56333	1	0.08078	0.62966	1.06633
23.5	0.08589	0.63878	1	0.02267	0.702	1.06322
24	0.17822	0.46478	1	0.02689	0.61611	1.15133
24.5	0.08422	0.42967	1	0.08633	0.42756	0.99789
25	0.01144	0.12456	0.135	0.09356	0.04244	0.05288
25.5	0.02089	0.12367	0.28378	0.09311	0.05145	0.21156
26	0.03	0.002	0.13033	0.08589	-0.05389	0.07444
26.5	0.03411	0.218	0.24978	0.03611	0.216	0.24778
27	0	0	0	0	0	0
27.5	0.09533	0.22667	0.42733	0.09722	0.22478	0.42544
28	0.02356	0.13078	0.19689	0.065	0.08934	0.15545
28.5	0	0.007	0	0.05211	-0.04511	-0.05211
29	0.07178	0.33233	0.69933	0.121	0.28311	0.65011
29.5	0.12844	0.61722	1	0.02089	0.72477	1.10755
30	0.06367	0.32489	0.51511	0.06422	0.32434	0.51456
30.5	0.09722	0.39889	1	0.10667	0.38944	0.99055
31	0.08278	0.43056	0.60889	0.03189	0.48145	0.65978
31.5	0.07056	0.75111	1	0.02356	0.79811	1.047
32	0.08067	0.72333	1	0.09056	0.71344	0.99011
32.5	0.14811	0.619	1	0.05689	0.71022	1.09122
33	0.05211	0.76933	1	0	0.82144	1.05211
33.5	0.089	0.74244	1	0.00244	0.829	1.08656
34	0.08767	0.72944	1	0.05967	0.75744	1.028
34.5	0.13156	0.71956	1	0.00367	0.84745	1.12789
35	0.10667	0.744	1	0.01422	0.83645	1.09245
35.5	0.14978	0.67522	1	0.06578	0.75922	1.084
36	0.108	0.73067	1	0.08422	0.75445	1.02378
36.5	0.09322	0.74422	1	0.07678	0.76066	1.01644
37	0.2	0.61233	1	0.07933	0.733	1.12067
37.5	0.124	0.66111	1	0.06911	0.716	1.05489
38	0.11533	0.62589	1	0.03411	0.70711	1.08122
38.5	0.136	0.47689	1	0.086	0.52689	1.05
39	0.17078	0.35256	1	0.13722	0.38612	1.03356
39.5	0.06933	0.27722	1	0.108	0.23855	0.96133
40	0.03689	0.275	0.66711	0.01656	0.29533	0.68744
40.5	0.05722	0.15378	0.71233	0	0.211	0.76955
41	0.02689	0.00311	0.19211	0.12033	-0.09033	0.09867
41.5	0.05244	0.17322	0.47144	0	0.22566	0.52388
42	0.09333	0.00189	0.18722	0.08067	0.01455	0.19988
42.5	0.00367	0.06611	0.16922	0.03	0.03978	0.14289
43	0	0.000111111	0	0.07789	-0.07778	-0.07789
43.5	0.07889	0.00278	0.21133	0.05244	0.02923	0.23778
44	0.03189	0.11967	0.233	0.04556	0.106	0.21933
44.5	0.04556	0.02067	0.27533	0.03689	0.02934	0.284
45	0.086	0.43611	0.75156	0.16967	0.35244	0.66789
45.5	0.07278	0.71656	1	0	0.78934	1.07278
46	0.12544	0.67433	1	0.10289	0.69688	1.02255
46.5	0.12844	0.652	1	0.01178	0.76866	1.11666
47	0.08633	0.61533	1	0.13889	0.56277	0.94744
47.5	0.10289	0.45322	1	0.01089	0.54522	1.092
48	0.07622	0.37133	0.63611	0.08578	0.36177	0.62655
48.5	0.06322	0.30733	0.74867	0.16789	0.20266	0.644
49	0	0.00122	0	0.11533	-0.11411	-0.11533
49.5	0.021	0.00356	0.03667	0.07889	-0.05433	-0.02122
50	0	0	0	0.05256	-0.05256	-0.05256
50.5	0	0.00267	0.00022	0.10756	-0.10489	-0.10734
51	0.01422	0.000111111	0.017	0.03722	-0.02289	-0.006
51.5	0.04667	0.58756	1	0.08567	0.54856	0.961
52	0.10756	0.43711	0.65667	0.08611	0.45856	0.67812
52.5	0.01178	0.00178	0.01333	0.08278	-0.06922	-0.05767
53	0.00244	0.04833	0.17367	0.02189	0.02888	0.15422
53.5	0.06933	0.66633	1	0.07633	0.65933	0.993
54	0.158	0.23056	0.81667	0.108	0.28056	0.86667
54.5	0.05967	0.70533	1	0.01533	0.74967	1.04434
55	0.14533	0.602	1	0.06378	0.68355	1.08155
55.5	0.08578	0.63733	1	0.02689	0.69622	1.05889
56	0.05689	0.70033	1	0.18311	0.57411	0.87378
56.5	0.09078	0.716	1	0.157	0.64978	0.93378
57	0.15256	0.64611	1	0.10033	0.69834	1.05223
57.5	0.09789	0.71889	1	0.05467	0.76211	1.04322
58	0.16878	0.66289	1	0.089	0.74267	1.07978
58.5	0.11811	0.70656	1	0.05622	0.76845	1.06189
59	0.16189	0.65467	1	0.01144	0.80512	1.15045
59.5	0.15867	0.627	1	0.05722	0.72845	1.10145
60	0.16967	0.57344	1	0.14722	0.59589	1.02245
60.5	0.16389	0.504	1	0.07356	0.59433	1.09033
61	0.162	0.45889	1	0.06367	0.55722	1.09833
61.5	0.14678	0.34733	1	0.086	0.40811	1.06078
62	0.07356	0.24844	0.73178	0.15256	0.16944	0.65278
62.5	0.065	0.12833	0.463	0.07622	0.11711	0.45178
63	0.03722	0.00544	0.09989	0.12844	-0.08578	0.00867
63.5	0.01656	0.06067	0.10967	0.04856	0.02867	0.07767
64	0.02189	0.07144	0.30789	0	0.09333	0.32978
64.5	0.04678	0.08022	0.44622	0.03889	0.08811	0.45411
65	0.01978	0.01889	0.03078	0.01	0.02867	0.04056
65.5	0.05622	0.06556	0.19278	0.17822	-0.05644	0.07078
66	0.01322	0.00356	0.01322	0.04667	-0.02989	-0.02023
66.5	0.02089	0.04722	0.23422	0.158	-0.08989	0.09711
67	0.01967	0.02478	0.35667	0.011	0.03345	0.36534
67.5	0.07789	0.14422	0.54011	0	0.22211	0.618
68	0.09011	0.12356	0.48989	0.06933	0.14434	0.51067
68.5	0.07933	0.25656	0.51044	0.17078	0.16511	0.41899
69	0.108	0.35211	0.62711	0.01978	0.44033	0.71533
69.5	0.13722	0.635	1	0.09333	0.67889	1.04389
70	0.121	0.64744	1	0.09322	0.67522	1.02778
70.5	0.08811	0.58733	1	0.13389	0.54155	0.95422
71	0.09056	0.53056	1	0.12844	0.49268	0.96212
71.5	0.09311	0.36478	1	0.06322	0.39467	1.02989

## Sheet: fly#4
Fig 4_S3
Fraction of time in behaviors								Power spectra
t(hours)	grooming	locomotion	wake	shuffled groomng	modified locomotion	modified wake		Period(hours)	grooming	locomotion	wake	shuffled groomng	modified locomotion	modified wake
0	0.11311	0.50422	1	0.20933	0.408	0.90378		35.75	0.06208	0.00857	0.05257	1.57529	0.06749	0.11771
0.5	0.11489	0.12489	0.39656	0.07478	0.165	0.43667		31.7778	0.84471	3.33869	2.29738	3.04802	2.5696	1.92578
1	0	0.19367	0.36956	0.11722	0.07645	0.25234		28.6	5.12385	17.4559	13.0712	3.19256	15.2851	11.8571
1.5	0	0.01544	0.00011	0.10311	-0.08767	-0.103		26	13.1483	39.4822	30.4261	2.10111	36.1684	28.4225
2	0.00189	0.00133	0.00189	0.07867	-0.07545	-0.07489		23.8333	18.6154	51.1209	40.3227	0.74348	47.6157	38.0356
2.5	0.11356	0.35722	0.87111	0.12233	0.34845	0.86234		22	18.0933	44.1977	36.2553	0.03939	41.8461	34.4792
3	0.04467	0.072	0.34433	0.20411	-0.08744	0.18489		20.4286	12.6108	25.3856	22.4403	0.07013	24.5829	21.5317
3.5	0	0.27078	0.37656	0	0.27078	0.37656		19.0667	4.72804	6.59313	6.95877	0.08953	6.65923	6.75339
4	0	0.01778	0	0.08889	-0.07111	-0.08889		17.875	0.33605	0.07399	0.21651	0.00313	0.08972	0.23198
4.5	0	0.00144	0	0	0.00144	0		16.8235	0.34806	2.69448	1.39293	0.26834	2.27892	1.24935
5	0.07389	0.22244	0.54856	0	0.29633	0.62245		15.8889	1.0707	4.26095	2.6724	0.72255	3.66343	2.39056
5.5	0.07422	0.00456	0.09878	0.04356	0.03522	0.12944
6	0.03489	0.425	0.62267	0	0.45989	0.65756
6.5	0.12256	0.47556	1	0.00656	0.59156	1.116
7	0.04356	0.72178	1	0	0.76534	1.04356
7.5	0.08589	0.65044	1	0.12322	0.61311	0.96267
8	0.10067	0.64267	1	0.00622	0.73712	1.09445
8.5	0.10256	0.70044	1	0	0.803	1.10256
9	0.067	0.71178	1	0.086	0.69278	0.981
9.5	0.10356	0.63722	1	0.16133	0.57945	0.94223
10	0.108	0.70422	1	0.09833	0.71389	1.00967
10.5	0.12589	0.66789	1	0.11311	0.68067	1.01278
11	0.11833	0.67189	1	0.02633	0.76389	1.092
11.5	0.07478	0.70856	1	0.07978	0.70356	0.995
12	0.09022	0.71222	1	0	0.80244	1.09022
12.5	0.14489	0.69811	1	0.01767	0.82533	1.12722
13	0.08244	0.70811	1	0.17944	0.61111	0.903
13.5	0.17367	0.44389	0.74722	0	0.61756	0.92089
14	0.06922	0.61522	1	0.00256	0.68188	1.06666
14.5	0.16133	0.56456	1	0.09367	0.63222	1.06766
15	0.13189	0.37989	1	0.10356	0.40822	1.02833
15.5	0.20933	0.24711	0.80767	0.04611	0.41033	0.97089
16	0.05233	0.06989	0.49833	0.00833	0.11389	0.54233
16.5	0.04611	0.06411	0.17144	0.10256	0.00766	0.11499
17	0.01789	0.08844	0.12156	0	0.10633	0.13945
17.5	0	0.005	0	0.05478	-0.04978	-0.05478
18	0.02222	0.00589	0.02222	0	0.02811	0.04444
18.5	0.04033	0.04756	0.12922	0.09889	-0.011	0.07066
19	0	0.00667	0.00022	0.00533	0.00134	-0.00511
19.5	0.00411	0.02767	0.00411	0.04889	-0.01711	-0.04067
20	0	0.01811	0	0.19	-0.17189	-0.19
20.5	0	0.01722	0	0.02833	-0.01111	-0.02833
21	0	0.01711	0	0.13767	-0.12056	-0.13767
21.5	0.01633	0.10156	0.11644	0.05522	0.06267	0.07755
22	0.05478	0.05544	0.19756	0.057	0.05322	0.19534
22.5	0.08744	0.17244	0.61889	0.15533	0.10455	0.551
23	0.15778	0.15	0.523	0.05233	0.25545	0.62845
23.5	0.07944	0.54133	1	0.08111	0.53966	0.99833
24	0.13244	0.36922	0.89744	0.00589	0.49577	1.02399
24.5	0	0.00889	0	0.09067	-0.08178	-0.09067
25	0	0.03144	0	0	0.03144	0
25.5	0.00478	0.00244	0.01233	0.134	-0.12678	-0.11689
26	0.00433	0.10956	0.00878	0.12256	-0.00867	-0.10945
26.5	0.00533	0.04767	0.00533	0.134	-0.081	-0.12334
27	0.02433	0.01522	0.09989	0.02433	0.01522	0.09989
27.5	0.01444	0.09778	0.147	0.15067	-0.03845	0.01077
28	0.13933	0.00156	0.235	0.12589	0.015	0.24844
28.5	0	0.17478	0.17689	0.067	0.10778	0.10989
29	0.00622	0.06744	0.01756	0.125	-0.05134	-0.10122
29.5	0	0.00144	0	0.13244	-0.131	-0.13244
30	0.01578	0.13289	0.157	0.253	-0.10433	-0.08022
30.5	0.06189	0.72489	1	0	0.78678	1.06189
31	0.10767	0.64778	1	0.03489	0.72056	1.07278
31.5	0.08111	0.62844	1	0	0.70955	1.08111
32	0.09367	0.62589	1	0.11489	0.60467	0.97878
32.5	0.16256	0.63556	1	0.01478	0.78334	1.14778
33	0.067	0.708	1	0	0.775	1.067
33.5	0.13767	0.654	1	0.18578	0.60589	0.95189
34	0.09889	0.68233	1	0.10067	0.68055	0.99822
34.5	0.09067	0.69144	1	0.13933	0.64278	0.95134
35	0.145	0.66289	1	0.08444	0.72345	1.06056
35.5	0.07467	0.69833	1	0	0.773	1.07467
36	0.167	0.65433	1	0.03256	0.78877	1.13444
36.5	0.06422	0.73267	1	0.08244	0.71445	0.98178
37	0.15533	0.65956	1	0.08744	0.72745	1.06789
37.5	0.13989	0.59278	1	0	0.73267	1.13989
38	0.22444	0.501	1	0.167	0.55844	1.05744
38.5	0.125	0.40644	1	0.06422	0.46722	1.06078
39	0.253	0.34722	0.96256	0.02222	0.578	1.19334
39.5	0.01478	0.14078	0.32256	0.06244	0.09312	0.2749
40	0.05522	0.06056	0.29967	0.05022	0.06556	0.30467
40.5	0.00544	0.002	0.00556	0.02689	-0.01945	-0.01589
41	0.02489	0.00622	0.12	0.01744	0.01367	0.12745
41.5	0	0	0	0.10089	-0.10089	-0.10089
42	0	0	0	0.08189	-0.08189	-0.08189
42.5	0.02833	0.00222	0.10144	0.14489	-0.11434	-0.01512
43	0	0	0	0.00478	-0.00478	-0.00478
43.5	0.01767	0.00922	0.12278	0.04033	-0.01344	0.10012
44	0	0.000444444	0.00011	0.17367	-0.17323	-0.17356
44.5	0.00833	0.04133	0.10811	0	0.04966	0.11644
45	0.00256	0.03333	0.00267	0.04233	-0.00644	-0.0371
45.5	0.02689	0.00389	0.09344	0.00544	0.02534	0.11489
46	0.12322	0.04622	0.436	0.02611	0.14333	0.53311
46.5	0.06822	0.084	0.48856	0	0.15222	0.55678
47	0.16911	0.08144	0.81156	0.00533	0.24522	0.97534
47.5	0	0.25233	0.22844	0.01633	0.236	0.21211
48	0	0.02744	0	0.04433	-0.01689	-0.04433
48.5	0.04233	0.00722	0.20233	0.10522	-0.05567	0.13944
49	0.055	0.01578	0.11389	0.13989	-0.06911	0.029
49.5	0.03256	0.008	0.187	0.11356	-0.073	0.106
50	0.057	0.07144	0.25522	0.15778	-0.02934	0.15444
50.5	0.02722	0.11467	0.26944	0.16911	-0.02722	0.12755
51	0.12233	0.11122	0.80033	0.06922	0.16433	0.85344
51.5	0	0.005	0.122	0.06233	-0.05733	0.05967
52	0.03656	0.27411	0.64	0.08589	0.22478	0.59067
52.5	0.15067	0.18489	0.43467	0	0.33556	0.58534
53	0.00589	0.25167	0.38189	0.108	0.14956	0.27978
53.5	0.07978	0.45111	0.79022	0.01578	0.51511	0.85422
54	0.01133	0.19589	0.23422	0.10767	0.09955	0.13788
54.5	0.17944	0.52111	1	0.067	0.63355	1.11244
55	0.134	0.49533	1	0.02867	0.60066	1.10533
55.5	0.07756	0.66111	1	0.07422	0.66445	1.00334
56	0.18578	0.61911	1	0.00433	0.80056	1.18145
56.5	0.10089	0.67622	1	0.00633	0.77078	1.09456
57	0.05022	0.67811	1	0.22444	0.50389	0.82578
57.5	0.10522	0.68367	1	0.00189	0.787	1.10333
58	0.10311	0.66244	1	0	0.76555	1.10311
58.5	0.08444	0.642	1	0.07467	0.65177	1.00977
59	0.07867	0.68922	1	0.06822	0.69967	1.01045
59.5	0.19122	0.63133	1	0.19122	0.63133	1
60	0.134	0.68456	1	0.09022	0.72834	1.04378
60.5	0.10511	0.61567	1	0.145	0.57578	0.96011
61	0.19	0.551	1	0.10511	0.63589	1.08489
61.5	0.06244	0.61067	1	0.16256	0.51055	0.89988
62	0.23867	0.37989	1	0.07722	0.54134	1.16145
62.5	0.20411	0.46911	0.96289	0.00411	0.66911	1.16289
63	0.08889	0.36956	0.78189	0.04467	0.41378	0.82611
63.5	0.11722	0.25478	0.66678	0.13189	0.24011	0.65211
64	0.02611	0.15433	0.40244	0.055	0.12544	0.37355
64.5	0.01744	0.01444	0.31322	0.07756	-0.04568	0.2531
65	0.02633	0.000555556	0.02633	0.02489	0.002	0.02777
65.5	0.00633	0.02756	0.00644	0	0.03389	0.01277
66	0.08189	0.02978	0.34722	0.06189	0.04978	0.36722
66.5	0	0	0	0.01133	-0.01133	-0.01133
67	0.00656	0.000666667	0.00656	0	0.00723	0.01312
67.5	0	0	0	0.01789	-0.01789	-0.01789
68	0.02867	0.00378	0.04111	0.23867	-0.20622	-0.16889
68.5	0.086	0.00289	0.14944	0.11833	-0.02944	0.11711
69	0.00533	0.01478	0.00533	0.01444	0.00567	-0.00378
69.5	0.04889	0.01167	0.11044	0	0.06056	0.15933
70	0.09833	0.04489	0.59878	0.07944	0.06378	0.61767
70.5	0.07722	0.01522	0.09544	0.07389	0.01855	0.09877
71	0.04433	0.02089	0.42278	0.03656	0.02866	0.43055
71.5	0.06233	0.18956	0.69978	0.02722	0.22467	0.73489
