# Supplementary material for: Automated analysis of long-term grooming behavior in Drosophila using a k-nearest neighbors classifier
Source: eLife. 2018 Feb 27;7:e34497. doi: 10.7554/eLife.34497 (PMC5860874; doi:10.7554/eLife.34497)
Supplement: Figure 6—source data 1. [file elife-34497-fig6-data1.xlsx]

## Sheet: F6A
Figure 6A
Fraction of time grooming
iso31+	per0
0.06221	0.07017
0.079	0.08744
0.05571	0.06221
0.08126	0.06173
0.06988	0.08053
0.06314	0.11179
0.07146	0.08263
0.07206	0.07397
0.06412	0.08986
0.07776	0.08125
0.07711	0.09401
0.06652	0.0817
0.07471	0.0682
0.05641	0.05814
0.08007	0.04331
0.07101	0.05118
0.0596	0.03231
0.0618	0.05891
0.05195	0.06909
0.06185	0.0389
0.07453	0.05149
0.07106	0.07924
0.06031	0.05035
0.06404	0.0388
0.06688	0.03254
0.08106	0.03876
0.08878	0.02765
0.0502	0.08961
0.04526	0.07369
0.07372	0.05914
0.0446	0.08979
0.0589	0.08478
0.0576	0.06834
0.09876	0.08728
0.09095	0.08189
0.10263	0.06901
0.06147	0.07328
0.06164	0.07433
0.05776	0.06471
0.06722	0.06886
0.05808	0.03497
0.05272	0.06403
0.05894	0.09113
0.06865	0.07713
0.04649	0.05648
0.07199	0.06565
0.05751	0.05375
0.07109	0.07991
0.06978	0.0646
0.04948	0.0709
0.05764	0.0556
0.04706	0.06512
0.05832	0.05662
0.05495
0.0519
0.05742
0.06685
0.06439
0.07419
0.05447
0.0698
0.0573
0.06279
0.04977
0.05985
0.05045
0.06449
0.06208
0.07302
0.05558
0.04788
0.06995
0.05333
0.05548
0.05465
0.07573
0.04707
0.06286
0.06696
0.05411
0.05253
0.05545
0.05777

## Sheet: F6B
Figure 6B
Fraction of time grooming
iso31	clkJRK
0.05757	0.06046
0.04707	0.07159
0.07215	0.08136
0.05009	0.06775
0.05671	0.07571
0.05173	0.11624
0.05882	0.08444
0.05232	0.06638
0.05604	0.08809
0.04902	0.08668
0.04968	0.08863
0.0737	0.06849
0.07107	0.10472
0.05591	0.09166
0.05422	0.07395
0.06334	0.09968
0.05564	0.10895
0.06853	0.08799
0.10529	0.11488
0.07006	0.09322
0.05422	0.08866
0.06248	0.09345
0.04309	0.1088
0.05346	0.09683
0.049	0.06509
0.08219
0.04327
0.06342

## Sheet: F6C
Figure 6C
Fraction of time grooming
Canton S	cyc01
0.07753	0.18585
0.06357	0.23448
0.13151	0.08007
0.11656	0.24723
0.11168	0.17763
0.09681	0.24394
0.11703	0.14309
0.08709	0.10357
0.1958	0.13239
0.11498	0.08354
0.11772	0.13195
0.16151	0.15689
0.16806	0.2622
0.13259	0.12611
0.11049	0.1374
0.11981	0.09375
0.07326	0.16196
0.06893	0.09655
0.08913
0.084
0.0727
0.07546
0.0826
0.09477
0.09038
0.07188
0.06543
0.07265
0.06224
0.09376
0.06956
0.06815
0.06916
0.09574
0.0709
0.05973
0.09487
0.13521
0.10248
0.08803
0.12513
0.05866
0.10037
0.09954
0.1006
0.07282
0.04752
0.07597
0.0713
0.09378
0.09896
0.0813
0.09763
0.10994
0.06121
0.07191
0.05284
0.0765
0.08644
0.07016
0.06875
0.07314
0.11034
0.07241
0.10429
0.11454
0.09256
0.0832
0.12305
0.14669
0.07474
0.07331
0.0895
0.08154
0.07863
0.08593

## Sheet: F6D
Figure 6D
Fraction of time grooming
w1118	fumin
0.10061	0.081022
0.0668	0.0715625
0.0862	0.0813773
0.06305	0.0786204
0.07345	0.0889005
0.07745	0.111103
0.06697	0.082669
0.04994	0.077
0.06142	0.104922
0.07562	0.0974896
0.06401	0.0775336
0.07012	0.0991296
0.06684	0.0881505
0.08212	0.068838
0.09416	0.0729444
0.06175	0.116363
0.06654	0.10003
	0.0724444
	0.0870833
	0.0847593
	0.0872269
	0.114588
	0.116657

## Sheet: F6E
Figure 5E
Fraction of time grooming
iso31	sss
0.05757	0.0127986
0.04707	0.0155347
0.07215	0.0183472
0.05009	0.0149028
0.05671	0.0346644
0.05173	0.0271505
0.05882	0.0274363
0.05232	0.0376412
0.05604	0.0138356
0.04902	0.00970023
0.04968	0.00742593
0.0737	0.00700926
0.07107	0.0737662
0.05591	0.0345972
0.05422	0.0124954
0.06334	0.014919
0.05564	0.0163912
0.06853
0.10529
0.07006
0.05422
0.06248
0.04309
0.05346
0.049
0.08219
0.04327
0.06342
