# Supplementary material for: Automated analysis of long-term grooming behavior in Drosophila using a k-nearest neighbors classifier
Source: eLife. 2018 Feb 27;7:e34497. doi: 10.7554/eLife.34497 (PMC5860874; doi:10.7554/eLife.34497)
Supplement: Figure 6—source data 2. [file elife-34497-fig6-data2.xlsx]

## Sheet: Fig 6-S1F
Fig 6-S1F
Fraction of time in behaviors normalized to wt control
sss		fumin		cyc01		clkJRK		per0
Grooming	sleep	Grooming	sleep	Grooming	sleep	Grooming	sleep	Grooming	sleep
0.21474	0.00625	1.12531	0.014	2.02008	0.97752	1.01436	0.69919	1.09811	0.83318
0.26065	0.00783	0.99392	0.10656	2.54871	0.91724	1.20114	0.44357	1.36846	0.64294
0.30784	0	1.13024	0.00487	0.87032	1.33895	1.36508	0.84236	0.97362	0.16444
0.25005	0	1.09195	0.00444	2.68727	0.57597	1.13667	0.48185	0.96605	0.8989
0.58162	0	1.23473	0	1.93078	1.25637	1.27031	0.5915	1.26027	1.23364
0.45554	0	1.5431	0	2.65154	0.86556	1.95035	0.17798	1.74944	0.58363
0.46034	0.11714	1.14818	0.02361	1.55535	0.91268	1.41678	0.60696	1.29314	0.52445
0.63156	0.11123	1.06944	0	1.12578	1.29033	1.11371	0.85991	1.15762	0.57874
0.23214	0.05385	1.45726	0.01619	1.43903	1.10595	1.47795	0.464	1.40628	0.81365
0.16276	0.19277	1.35402	0.03801	0.90806	1.31105	1.45433	0.62258	1.2715	0.29122
0.1246	0	1.07686	0.01979	1.43425	0.75397	1.48711	0.35952	1.47116	0.56959
0.1176	0	1.3768	0.12232	1.70529	0.17197	1.1491	0.80425	1.27858	1.04179
1.2377	0	1.2243	0.03906	2.85004	0.69031	1.75712	0.33538	1.06731	1.36491
0.5805	0.0065	0.9561	0.06289	1.37075	0.7066	1.53791	0.67594	0.9099	1.35791
0.2097	0.0145	1.0131	0.06803	1.49343	0.98519	1.24076	0.66807	0.67778	1.4692
0.2503	0	1.6162	0	1.01907	1.28885	1.67241	0.4689	0.80092	1.03113
0.275	0	1.3893	0	1.76047	0.67544	1.82797	0.51388	0.50565	1.51605
		1.0062	0.13377	1.04949	1.26637	1.47632	0.63494	0.92198	1.05435
		1.2095	0.01128			1.92743	0.40671	1.08123	1.29382
		1.1772	0.09644			1.56409	0.4854	0.60875	1.35915
		1.2115	0.06699			1.48766	0.57071	0.80574	1.26821
		1.5915	0.06027			1.5679	0.92265	1.24005	0.84257
		1.6202	0.04237			1.82556	0.53129	0.78795	1.40151
						1.6246	0.54224	0.60715	1.44433
						1.09216	0.98307	0.50931	1.37279
								0.60661	1.60562
								0.43263	1.64247
								1.40236	0.57631
								1.15328	0.32929
								0.92553	0.94942
								1.40515	0.98879
								1.32673	0.3764
								1.06956	0.65994
								1.36592	0.45699
								1.28159	1.03238
								1.07999	0.93095
								1.14679	1.33919
								1.16317	1.33628
								1.01261	0.66798
								1.07757	1.25613
								0.54726	1.44996
								1.00211	0.85987
								1.4262	0.61911
								1.20711	1.13001
								0.88394	1.18754
								1.02745	1.08468
								0.84116	0.61064
								1.25058	0.60374
								1.01089	1.12712
								1.10952	0.85868
								0.8701	0.86794
								1.01904	0.67941
								0.88601	0.86573

## Sheet: Fig 6-S1G
Fig 6-S1G
Fraction of time in behaviors normalized to wt control
sss		fumin		cyc01		clkJRK		per0
Grooming	sleep	Grooming	sleep	Grooming	sleep	Grooming	sleep	Grooming	sleep
0.21474	2.95184	1.12531	1.738	2.02008	0.5081	1.01436	1.81801	1.09811	1.37481
0.26065	2.97659	0.99392	1.4271	2.54871	0.39657	1.20114	2.20508	1.36846	1.47068
0.30784	3.13437	1.13024	1.67029	0.87032	0.57873	1.36508	1.22791	0.97362	2.52832
0.25005	3.24576	1.09195	1.67402	2.68727	0.77865	1.13667	2.36461	0.96605	1.21347
0.58162	3.01477	1.23473	1.58963	1.93078	0.33484	1.27031	1.76774	1.26027	0.55658
0.45554	2.87396	1.5431	1.82975	2.65154	0.54156	1.95035	2.64406	1.74944	1.27899
0.46034	2.30901	1.14818	1.54975	1.55535	0.3901	1.41678	1.48001	1.29314	1.85047
0.63156	2.45743	1.06944	1.98991	1.12578	0.44856	1.11371	1.2761	1.15762	1.75085
0.23214	2.63766	1.45726	1.46028	1.43903	0.67293	1.47795	2.15402	1.40628	1.37504
0.16276	0.59292	1.35402	1.45328	0.90806	0.27381	1.45433	1.76802	1.2715	1.91816
0.1246	2.90611	1.07686	1.74628	1.43425	0.93657	1.48711	2.18844	1.47116	1.36098
0.1176	3.1568	1.3768	1.46015	1.70529	1.94596	1.1491	1.47452	1.27858	0.58439
1.2377	2.4821	1.2243	1.26367	2.85004	0.4972	1.75712	2.27374	1.06731	0.50596
0.5805	2.962	0.9561	1.24488	1.37075	1.45798	1.53791	1.40342	0.9099	0.36475
0.2097	3.0727	1.0131	1.37633	1.49343	0.31522	1.24076	1.57536	0.67778	0.3122
0.2503	3.2055	1.6162	1.40773	1.01907	0.73287	1.67241	1.85319	0.80092	1.04202
0.275	3.2655	1.3893	1.98432	1.76047	1.18968	1.82797	1.52634	0.50565	0.50171
		1.0062	1.12299	1.04949	0.54064	1.47632	1.75048	0.92198	0.91482
		1.2095	1.92319			1.92743	2.1629	1.08123	0.44679
		1.1772	1.25104			1.56409	2.12473	0.60875	0.51437
		1.2115	1.40524			1.48766	1.31495	0.80574	0.58656
		1.5915	1.18686			1.5679	1.00985	1.24005	1.0156
		1.6202	1.53718			1.82556	1.98337	0.78795	0.41253
						1.6246	1.88614	0.60715	0.32143
						1.09216	0.93818	0.50931	0.54817
								0.60661	0.20836
								0.43263	0.2993
								1.40236	1.74361
								1.15328	1.81319
								0.92553	1.18243
								1.40515	0.95321
								1.32673	1.77395
								1.06956	1.42142
								1.36592	1.60774
								1.28159	0.80111
								1.07999	1.13084
								1.14679	0.43768
								1.16317	0.37809
								1.01261	1.46374
								1.07757	0.66537
								0.54726	0.47363
								1.00211	1.26757
								1.4262	1.4762
								1.20711	0.78371
								0.88394	0.53946
								1.02745	1.07573
								0.84116	1.9077
								1.25058	1.69735
								1.01089	0.72869
								1.10952	1.08679
								0.8701	1.42859
								1.01904	1.6692
								0.88601	1.24481

## Sheet: Fig 6-S1H
Fig 6-S1H
Fraction of time grooming
OR	PGRP	imd
0.09267	0.11018	0.0711
0.1627	0.09761	0.05658
0.10364	0.11972	0.05753
0.15036	0.11625	0.04649
0.09607	0.11439	0.04887
0.0986	0.121	0.045
0.09985	0.09284	0.07029
0.14567	0.12347	0.05627
0.04221	0.11402	0.06627
0.10941	0.12171	0.05611
0.15393	0.13809	0.06404
0.08669	0.07359	0.05885
0.09629	0.11496	0.06545
0.08594	0.1272	0.08165
0.18933	0.07909	0.08761
0.09972	0.14277	0.0714
0.11183	0.11697	0.08067
0.11403	0.10643	0.11342
0.12057	0.10571	0.08224
0.10101	0.07663	0.06083
0.1173	0.09089	0.06493
0.12546	0.11425	0.08256
0.13391	0.05922	0.067
0.11217	0.12961	0.06806
0.15199	0.09581	0.0846
0.12217	0.08346	0.08329
0.092	0.08766	0.06999
0.09406	0.09525	0.06975
0.14136	0.1262	0.06598
0.06629	0.08985	0.08704
0.09118	0.10017	0.09214
0.09545	0.10374	0.07181
0.11305	0.11435	0.05826
0.05977	0.09467	0.04887
0.12132	0.10548	0.05496
0.11591	0.1129	0.06781
0.14149	0.11111	0.04061
0.07377	0.10684	0.07007
0.07007	0.07372	0.0512
0.08494	0.0914	0.07162
0.1733	0.08977	0.06338
0.08741	0.11621	0.06919
0.11407	0.0972	0.07223
0.06418	0.09592	0.06541
0.12411	0.07388	0.06073
0.1093	0.07159
0.0824	0.17416
0.06991
0.07338
0.06131
0.14388
0.11462
0.10265
0.13755
0.12369
0.10397
